# Supplementary material for: The influence of different carbonate ligands on the hydrolytic stability and reduction of platinum(iv) prodrugs
Source: Royal Society of Chemistry journal article supplement (doi:10.1039/d1dt03959h), 2021-12-13
Supplement: d1dt03959h1.pdf [file d1dt03959h1.pdf]

**Supporting Information for**

**The Influence of Carbonate Ligands on the Hydrolytic Stability and Reduction of Platinum(IV) Prodrugs**

Shu Chen,<sup>ab</sup> Ka-Yan Ng,<sup>a</sup> Qiyuan Zhou,<sup>ab</sup> Houzong Yao,<sup>ab</sup> Zhiqin Deng,<sup>ab</sup> Man-Kit Tse,<sup>a</sup> and Guangyu Zhu<sup>\*ab</sup>

<sup>a</sup>Department of Chemistry, City University of Hong Kong, 83 Tat Chee Avenue, Hong Kong SAR 999077, People's Republic of China

<sup>b</sup>City University of Hong Kong Shenzhen Research Institute, Shenzhen 5108057, People's Republic of China

\*Email: [guangzhu@cityu.edu.hk](mailto:guangzhu@cityu.edu.hk)

## Contents

**Schemes S1-S3.** Synthetic routes of Pt(IV) complexes bearing axial carbonate or carboxylate ligands.

**Figure S1.** ESI-HRMS spectrum of complex **1a**.

**Figures S2–S4.** NMR spectra of complex **1a**.

**Figure S5.** ESI-HRMS spectrum of complex **1b**.

**Figures S6–S8.** NMR spectra of complex **1b**.

**Figure S9.** ESI-HRMS spectrum of complex **1a'**.

**Figures S10–S12.** NMR spectra of complex **1a'**.

**Figure S13.** ESI-HRMS spectrum of complex **1b'**.

**Figures S14–S16.** NMR spectra of complex **1b'**.

**Figure S17.** ESI-HRMS spectrum of complex **2a**.

**Figures S18–S20.** NMR spectra of complex **2a**.

**Figure S21.** ESI-HRMS spectrum of complex **2b**.

**Figures S22–S24.** NMR spectra of complex **2b**.

**Figure S25.** ESI-HRMS spectrum of complex **2a'**.

**Figures S26–S28.** NMR spectra of complex **2a'**.

**Figure S29.** ESI-HRMS spectrum of complex **2b'**.

**Figures S30–S32.** NMR spectra of complex **2b'**.

**Figure S33.** ESI-HRMS spectrum of complex **3a**.

**Figures S34–S36.** NMR spectra of complex **3a**.

**Figure S37.** ESI-HRMS spectrum of complex **3b**.

**Figures S38–S40.** NMR spectra of complex **3b**.

**Figure S41.** ESI-HRMS spectrum of complex **3a'**.

**Figures S42–S44.** NMR spectra of complex **3a'**.

**Figure S45.** ESI-HRMS spectrum of complex **3b'**.

**Figures S46–S48.** NMR spectra of complex **3b'**.

**Figures S49–S51.** HPLC chromatograms for the purity test of the Pt(IV) complexes of **1a-1b**, **1a'-1b'**, **2a-2b**, **2a'-2b'**, **3a-3b**, and **3a'-3b'**.

**Figures S52–S54.** HPLC chromatograms for the stability test of the Pt(IV) complexes of **1a-1b**, **1a'-1b'**, **2a-2b**, **2a'-2b'**, **3a-3b**, and **3a'-3b'**.

**Figures S55–S57.** The decay profiles of the Pt(IV) complexes **1a-1b**, **1a'-1b'**, **2a-2b**, **2a'-2b'**, **3a-3b**, and **3a'-3b'** in a PBS buffer (pH 7.4) at 37 °C within 24 hours.

**Figure S58.** HPLC chromatograms of Pt(IV) complexes **1a'**, **1b'**, **2a'**, and **2b'** in medium and PBS, respectively.

**Figure S59.** HPLC chromatograms of Pt(IV) complexes **1a'**, **1b'**, **2a'**, and **2b'** in medium at 37 °C from 0 to 24 h.

**Figure S60.** ESI-HRMS spectrum and proposed hydrolytic pathway of *c,t,c*-[Pt(NH<sub>3</sub>)<sub>2</sub>(OCOOPhCF<sub>3</sub>)(OCOCH<sub>3</sub>)(Cl)<sub>2</sub>] **3a'** in PBS-buffered H<sub>2</sub><sup>18</sup>O after 24 h.

**Figure S61.** ESI-HRMS spectrum and proposed hydrolytic pathway of *c,t,c*-[Pt(NH<sub>3</sub>)<sub>2</sub>(OCOCH<sub>3</sub>)Cl(Cl)<sub>2</sub>] in PBS-buffered H<sub>2</sub><sup>18</sup>O after 24 h.

**Figure S62–S64.** HPLC chromatograms for the reduction test of the Pt(IV) complexes of **1a-1b**, **1a'-1b'**, **2a-2b**, **2a'-2b'**, **3a-3b**, and **3a'-3b'**.

**Figure S65–S67.** The decay profiles of the Pt(IV) complexes **1a-1b**, **1a'-1b'**, **2a-2b**, **2a'-2b'**, **3a-3b**, and **3a'-3b'** in a PBS buffer (pH 7.4) at 37 °C with excess amount of sodium ascorbate.

**Figures S68–S70.** Cyclic voltammograms for Pt(IV) complexes of **1a-1b**, **1a'-1b'**, **2a-2b**, **2a'-2b'**, **3a-3b**, and **3a'-3b'**.

**Figures S71–S74.** The investigation of reduction products of **2b'**.

**Table S1.** <sup>195</sup>Pt, and selected <sup>1</sup>H, <sup>13</sup>C NMR chemical shifts of the carbonate and carboxylate Pt(IV) complexes in DMSO-*d*<sub>6</sub>.

**Table S2.** The equation for pseudo first order reaction and half-life of cisplatin-based Pt(IV) complexes.

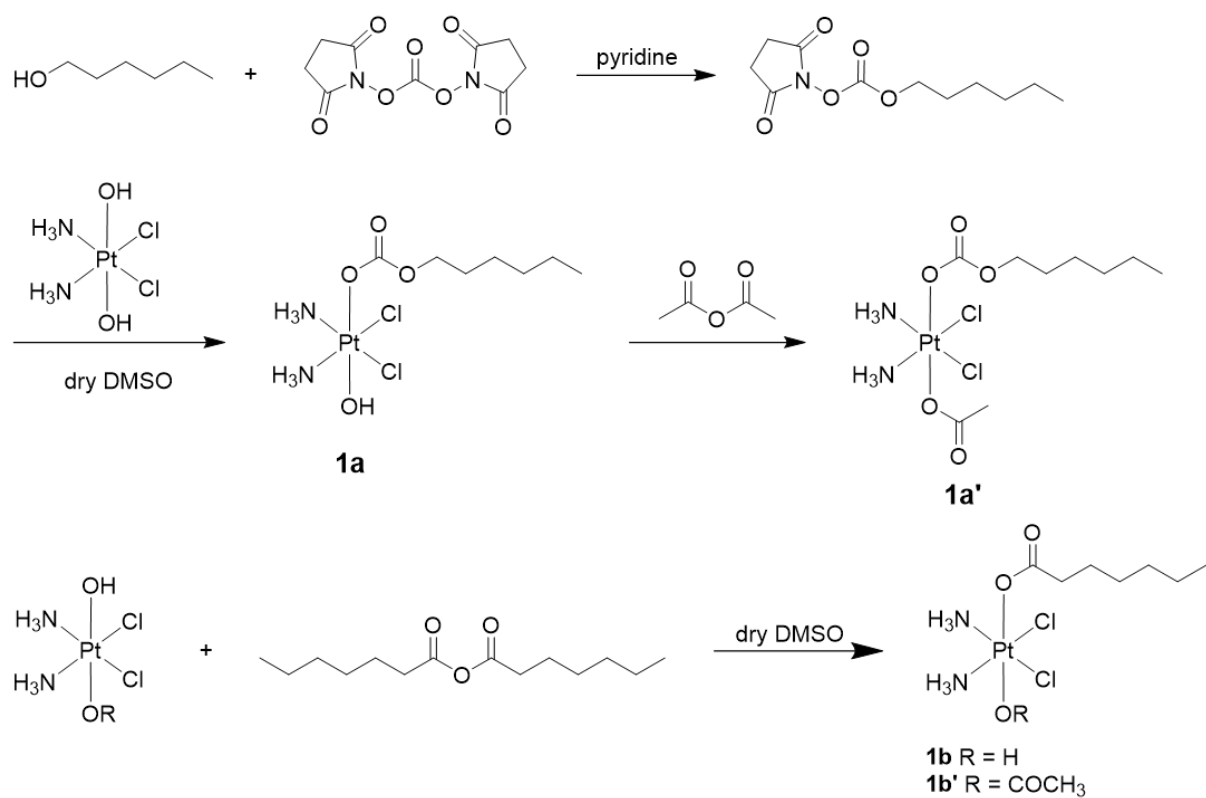

**Scheme S1.** Synthetic pathway of complexes **1a**, **1a'**, **1b**, and **1b'** bearing carboxylate or carbonate axial ligands.

I

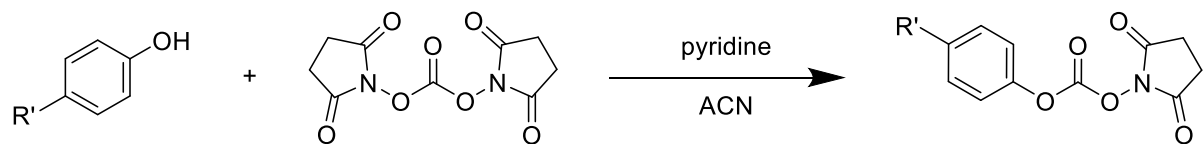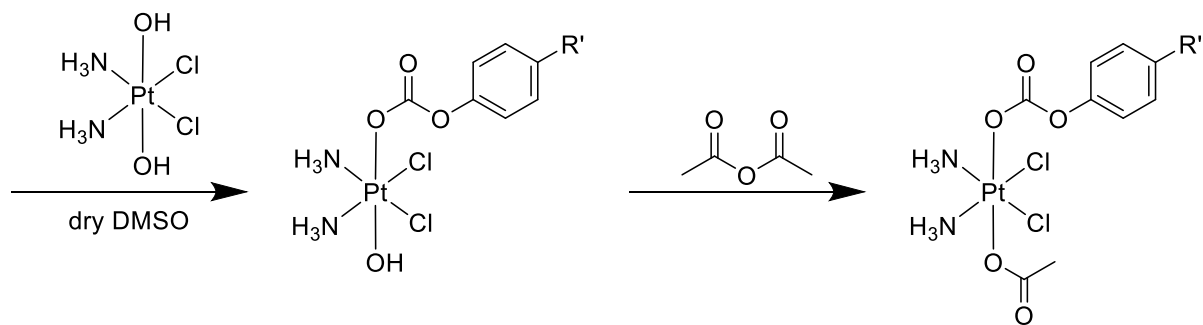**2a** R' = H**3a** R' = CF<sub>3</sub>**2a'** R' = H**3a'** R' = CF<sub>3</sub>

**Scheme S2.** Synthetic pathway of complexes **2a**, **2a'**, **3a**, and **3a'** bearing an axial carbonate ligand.

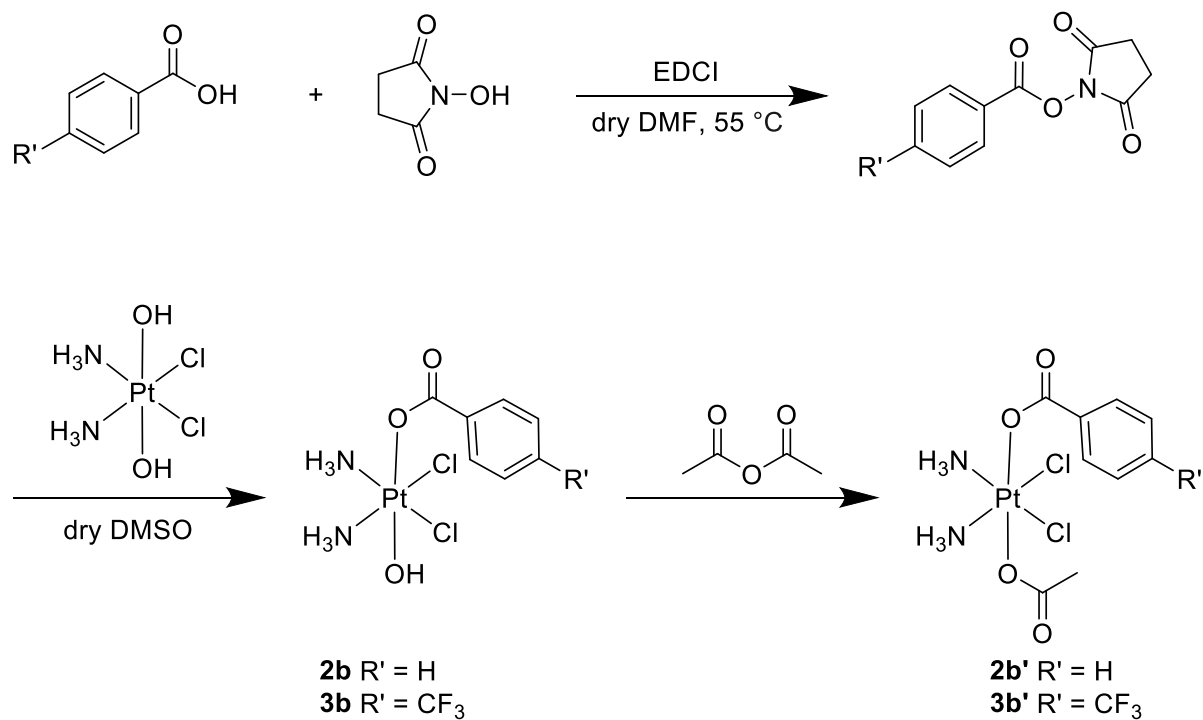

**Scheme S3.** Synthetic pathway of complexes **2b**, **2b'**, **3b**, and **3b'** bearing an axial carboxylate ligand.

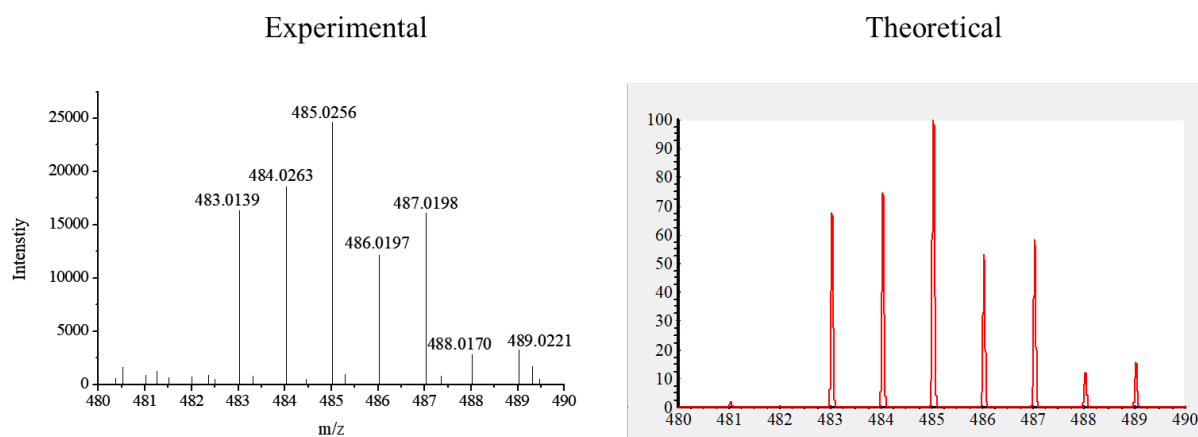

ESI-HRMS (positive ion mode), m/z.  $[M+Na]^+$  calculated for  $C_7H_{20}Cl_2N_2NaO_4Pt$ : 485.0323, found: 485.0256

**Figure S1.** ESI-HRMS spectrum of complex *c,t,c*- $[Pt(NH_3)_2(OCOOCH_2CH_2CH_2CH_2CH_2-CH_3)(OH)(Cl)_2]$  **1a**.

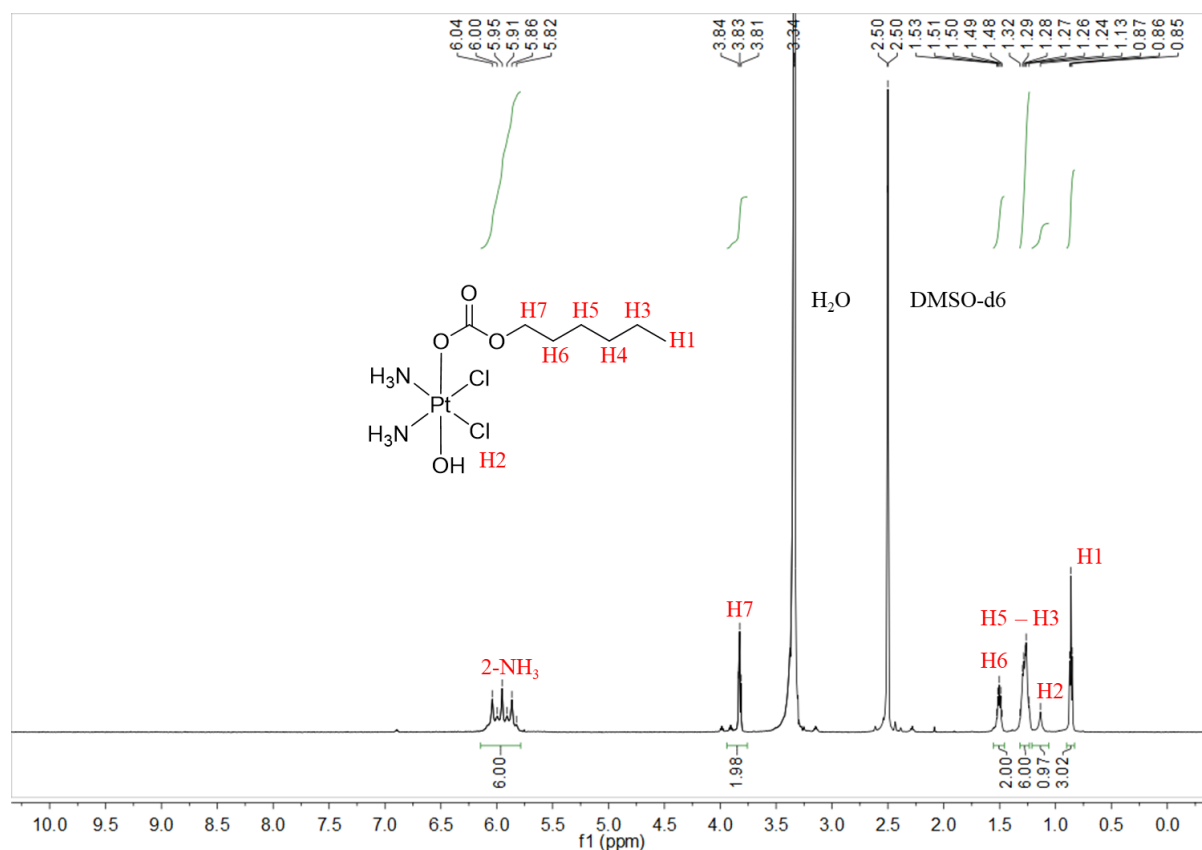

**Figure S2.**  $^1H$  NMR spectrum of complex *c,t,c*- $[Pt(NH_3)_2(OCOOCH_2CH_2CH_2CH_2CH_2CH_3)-(OH)(Cl)_2]$  **1a** in  $DMSO-d_6$ .

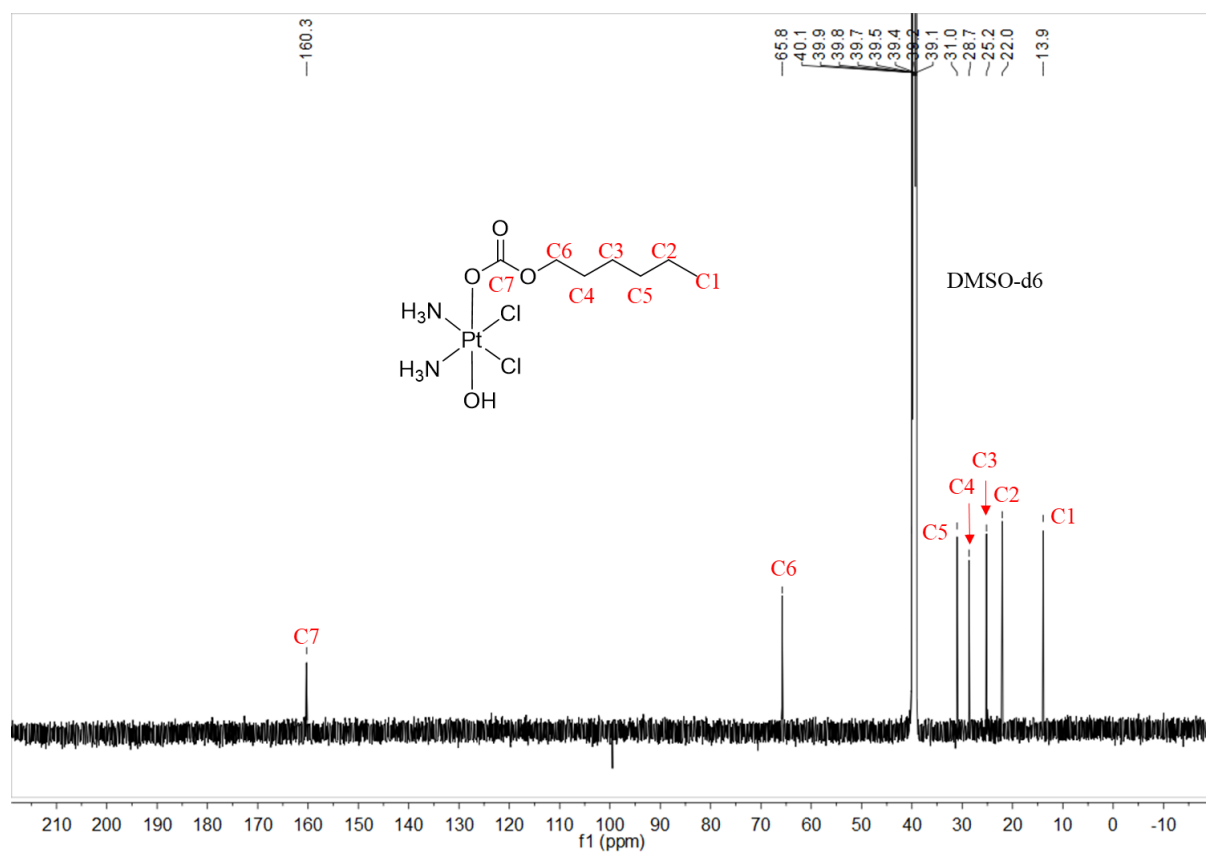

**Figure S3.** <sup>13</sup>C NMR spectrum of complex  $c,t,c$ -[Pt(NH<sub>3</sub>)<sub>2</sub>(OCOOCH<sub>2</sub>CH<sub>2</sub>CH<sub>2</sub>CH<sub>2</sub>CH<sub>2</sub>CH<sub>3</sub>)(OH)(Cl)<sub>2</sub>] **1a** in DMSO-*d*<sub>6</sub>.

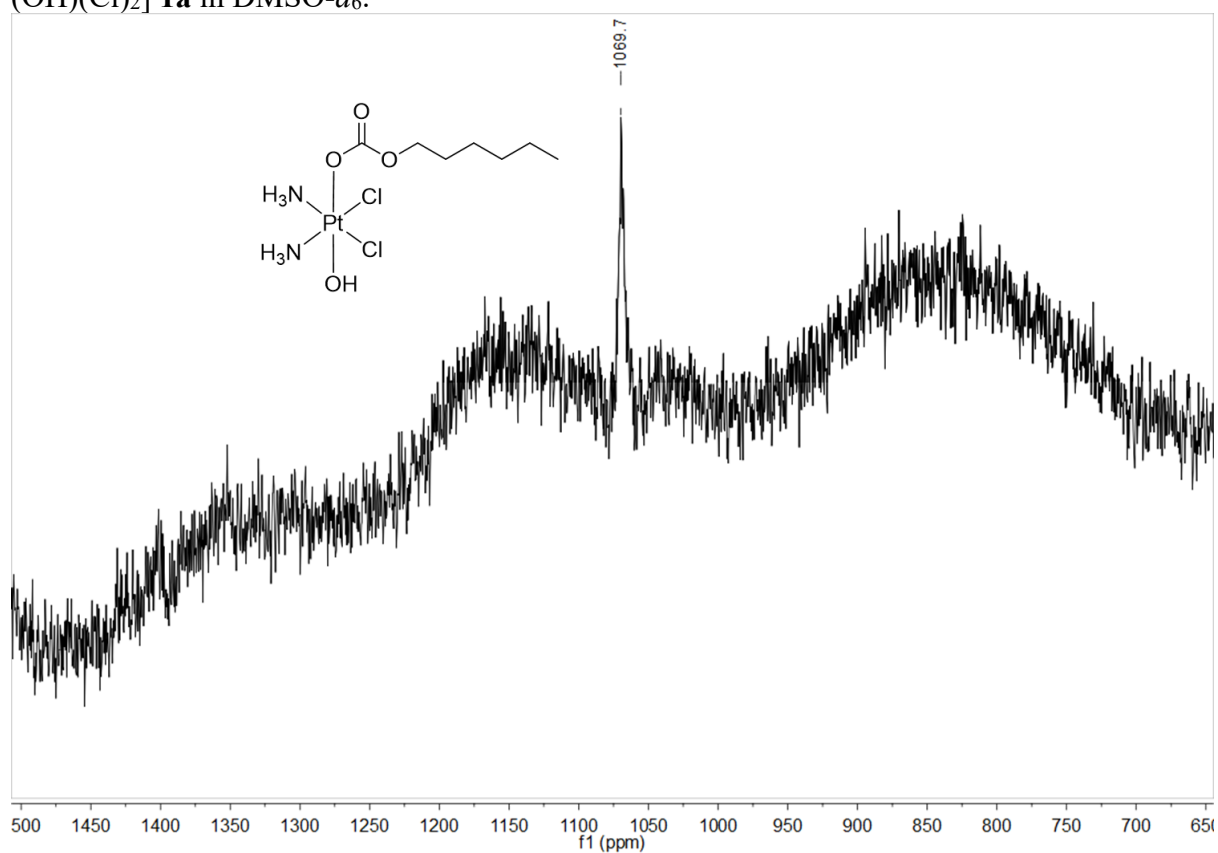

**Figure S4.** <sup>195</sup>Pt NMR spectrum of complex  $c,t,c$ -[Pt(NH<sub>3</sub>)<sub>2</sub>(OCOOCH<sub>2</sub>CH<sub>2</sub>CH<sub>2</sub>CH<sub>2</sub>CH<sub>2</sub>CH<sub>3</sub>)(OH)(Cl)<sub>2</sub>] **1a** in DMSO-*d*<sub>6</sub>.



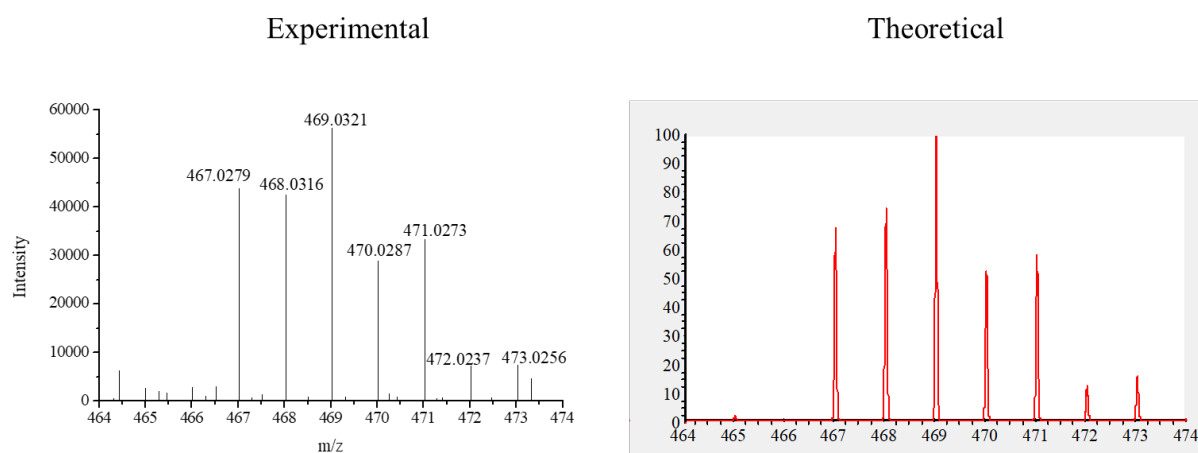

ESI-HRMS (positive ion mode), m/z.  $[M+Na]^+$  calculated for  $C_7H_{20}Cl_2N_2NaO_3Pt$ : 469.0373, found: 469.0321

**Figure S5.** ESI-HRMS spectrum of complex  $c,t,c$ - $[Pt(NH_3)_2(OCOCH_2CH_2CH_2CH_2CH_2CH_3)(OH)(Cl)_2]$  **1b**.

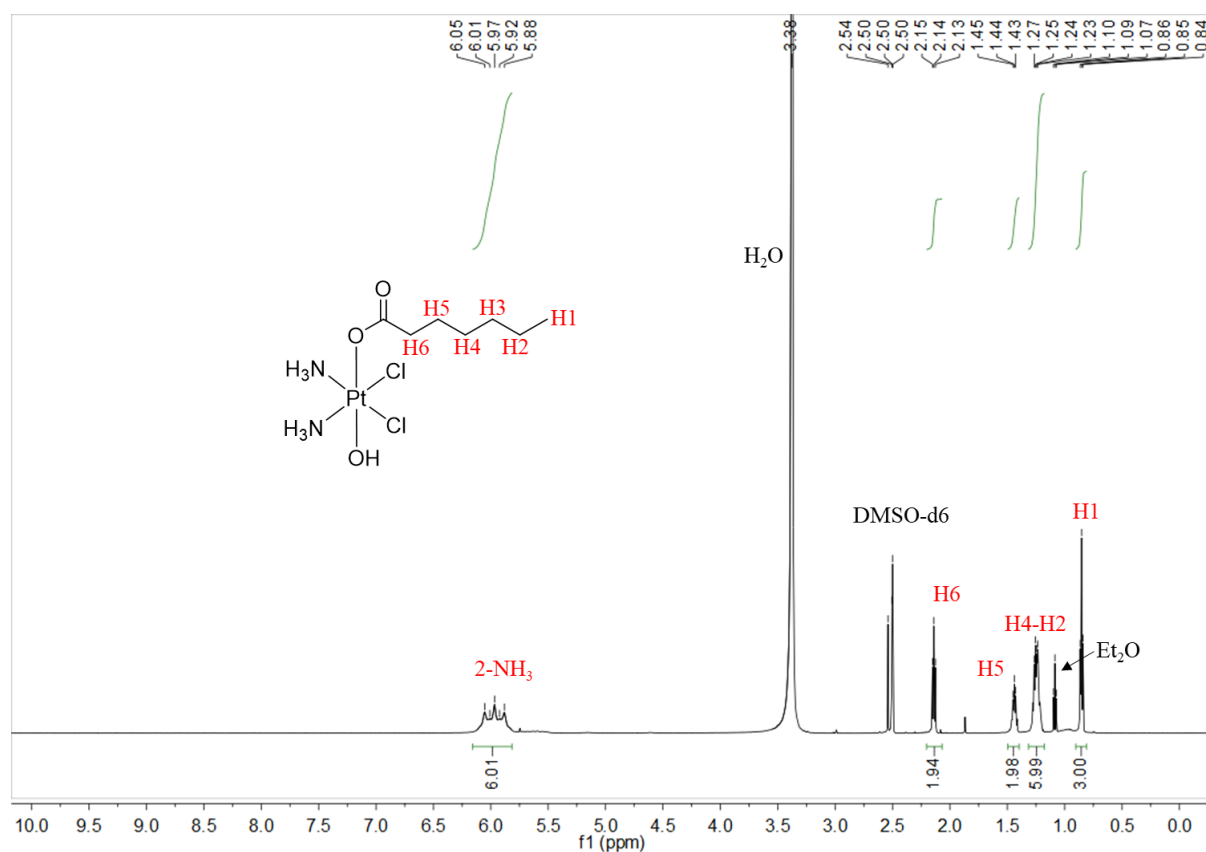

**Figure S6.**  $^1H$  NMR spectrum of complex  $c,t,c$ - $[Pt(NH_3)_2(OCOCH_2CH_2CH_2CH_2CH_2CH_3)(OH)(Cl)_2]$  **1b** in  $DMSO-d_6$ .

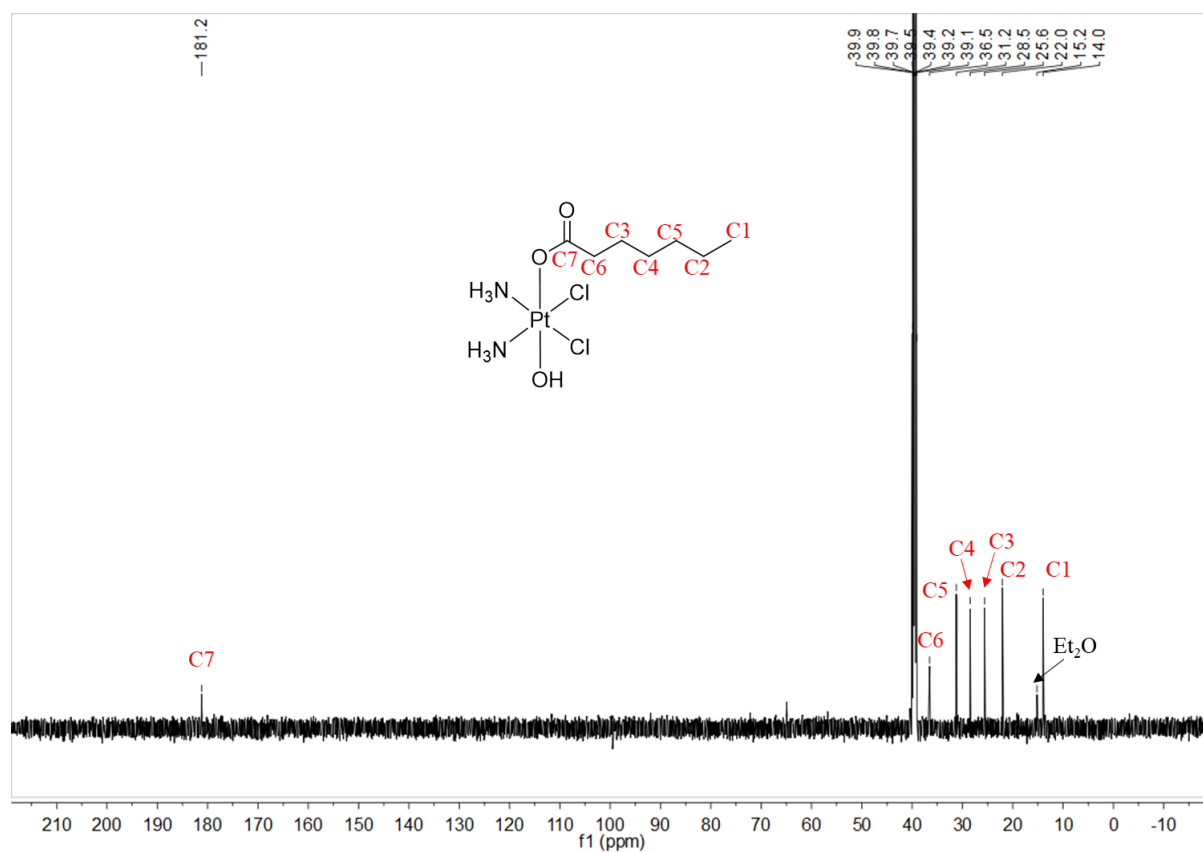

**Figure S7.** <sup>13</sup>C NMR spectrum of complex  $c,t,c$ -[Pt(NH<sub>3</sub>)<sub>2</sub>(OCOCH<sub>2</sub>CH<sub>2</sub>CH<sub>2</sub>CH<sub>2</sub>CH<sub>2</sub>CH<sub>3</sub>)-(OH)(Cl)<sub>2</sub>] **1b** in DMSO-*d*<sub>6</sub>.

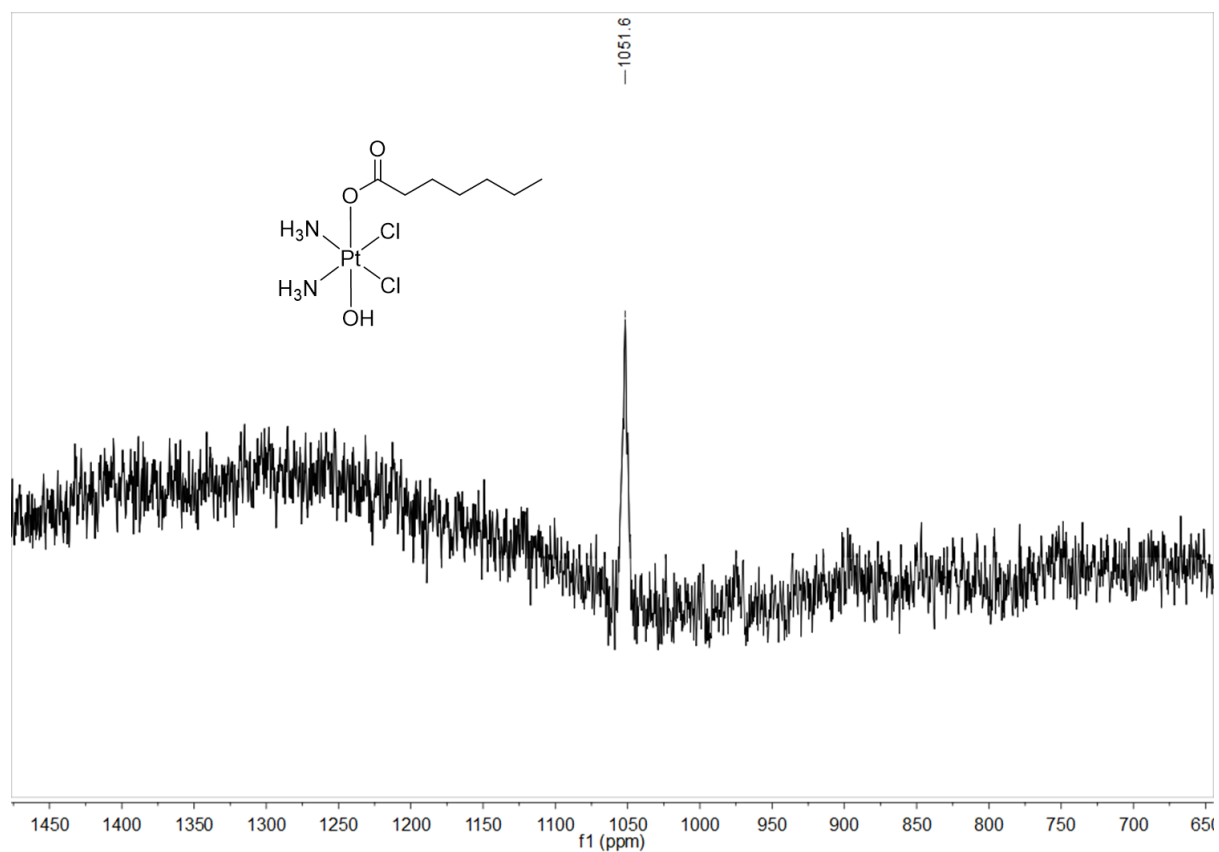

**Figure S8.** <sup>195</sup>Pt NMR spectrum of complex  $c,t,c$ -[Pt(NH<sub>3</sub>)<sub>2</sub>(OCOCH<sub>2</sub>CH<sub>2</sub>CH<sub>2</sub>CH<sub>2</sub>CH<sub>2</sub>CH<sub>3</sub>)-(OH)(Cl)<sub>2</sub>] **1b** in DMSO-*d*<sub>6</sub>.

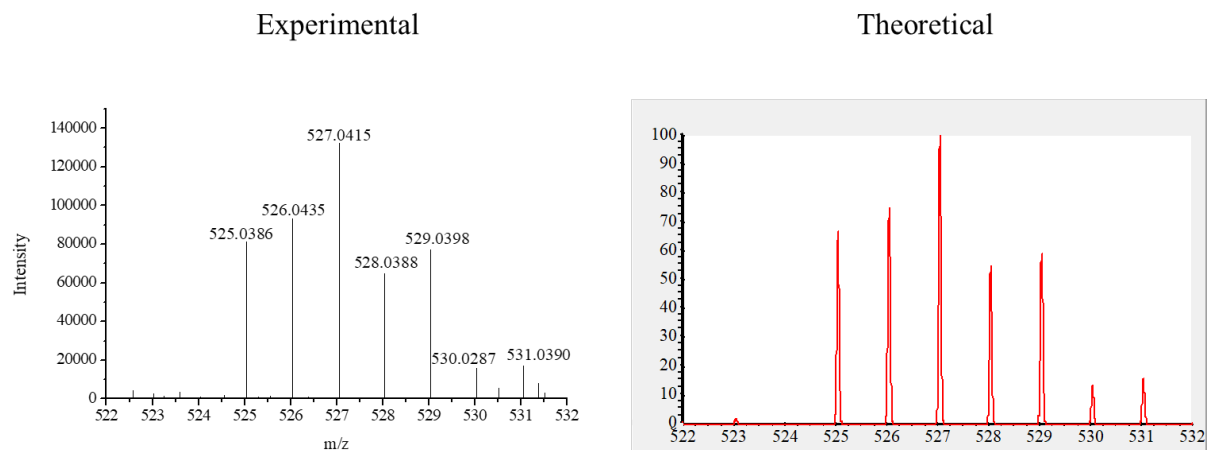

ESI-HRMS (positive ion mode), m/z.  $[M+Na]^+$  calculated for  $C_9H_{22}Cl_2N_2NaO_5Pt$ : 527.0430, found: 527.0415

**Figure S9.** ESI-HRMS spectrum of complex *c,t,c*- $[Pt(NH_3)_2(OCOOCH_2CH_2CH_2CH_2CH_2CH_3)(OCOCH_3)(Cl)_2]$  **1a'**.

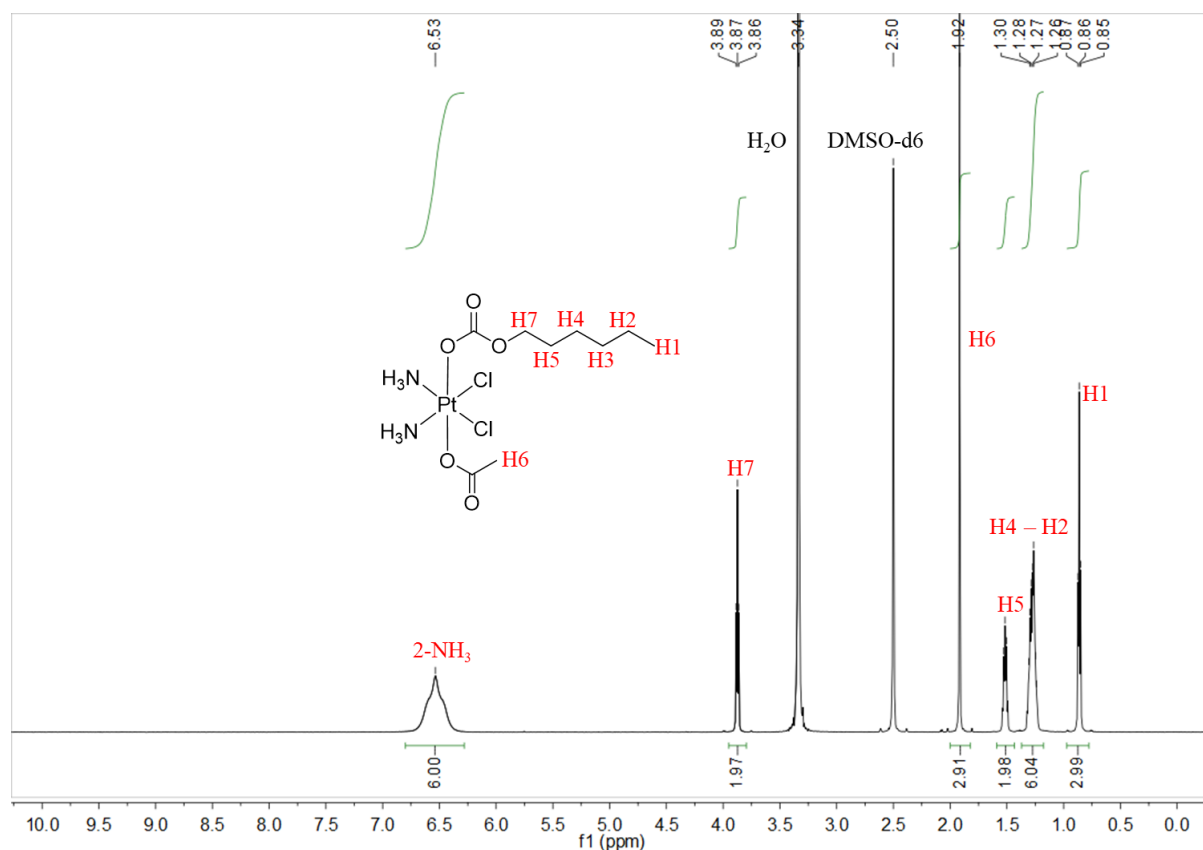

**Figure S10.**  $^1H$  NMR spectrum of complex *c,t,c*- $[Pt(NH_3)_2(OCOOCH_2CH_2CH_2CH_2CH_2CH_3)(OCOCH_3)(Cl)_2]$  **1a'** in  $DMSO-d_6$ .

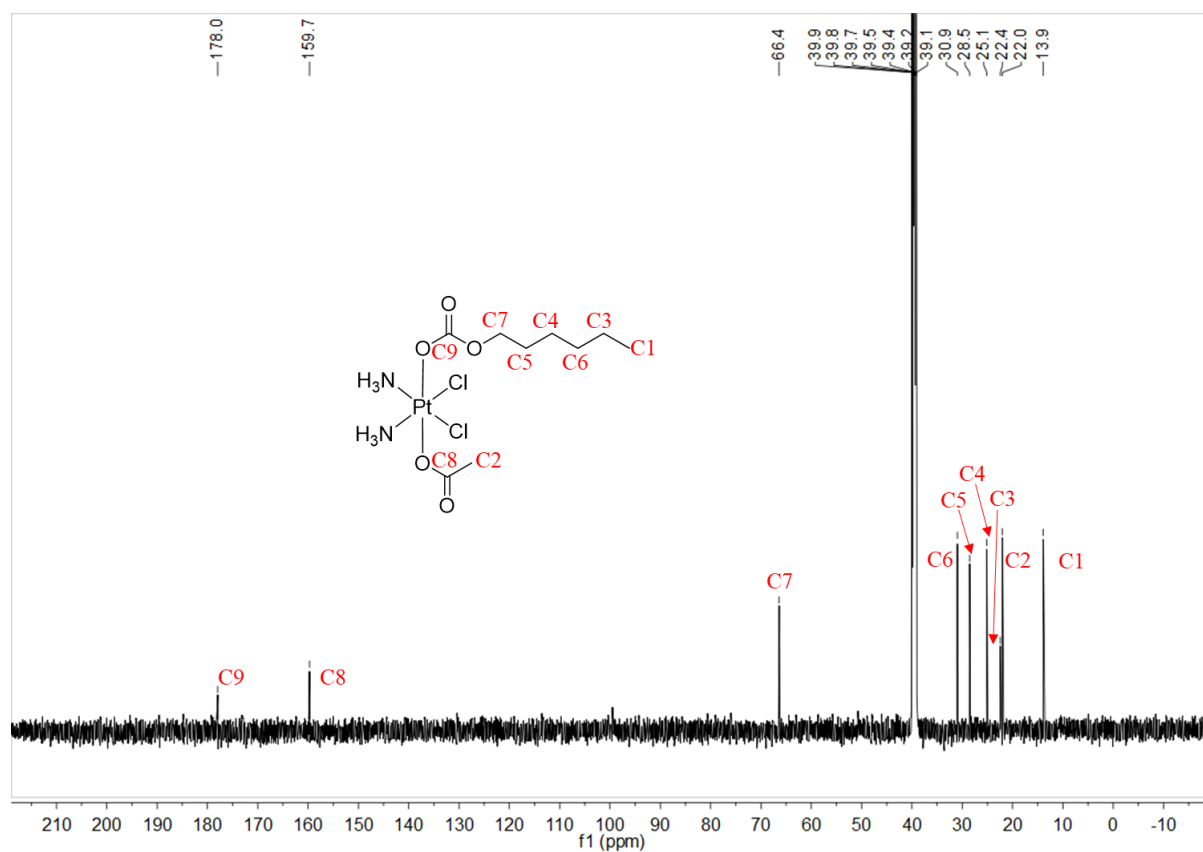

**Figure S11.**  $^{13}\text{C}$  NMR spectrum of complex  $c,t,c$ - $[\text{Pt}(\text{NH}_3)_2(\text{OCOOCH}_2\text{CH}_2\text{CH}_2\text{CH}_2\text{CH}_2\text{CH}_3)(\text{OCOCH}_3)(\text{Cl})_2]$  **1a'** in  $\text{DMSO-}d_6$ .

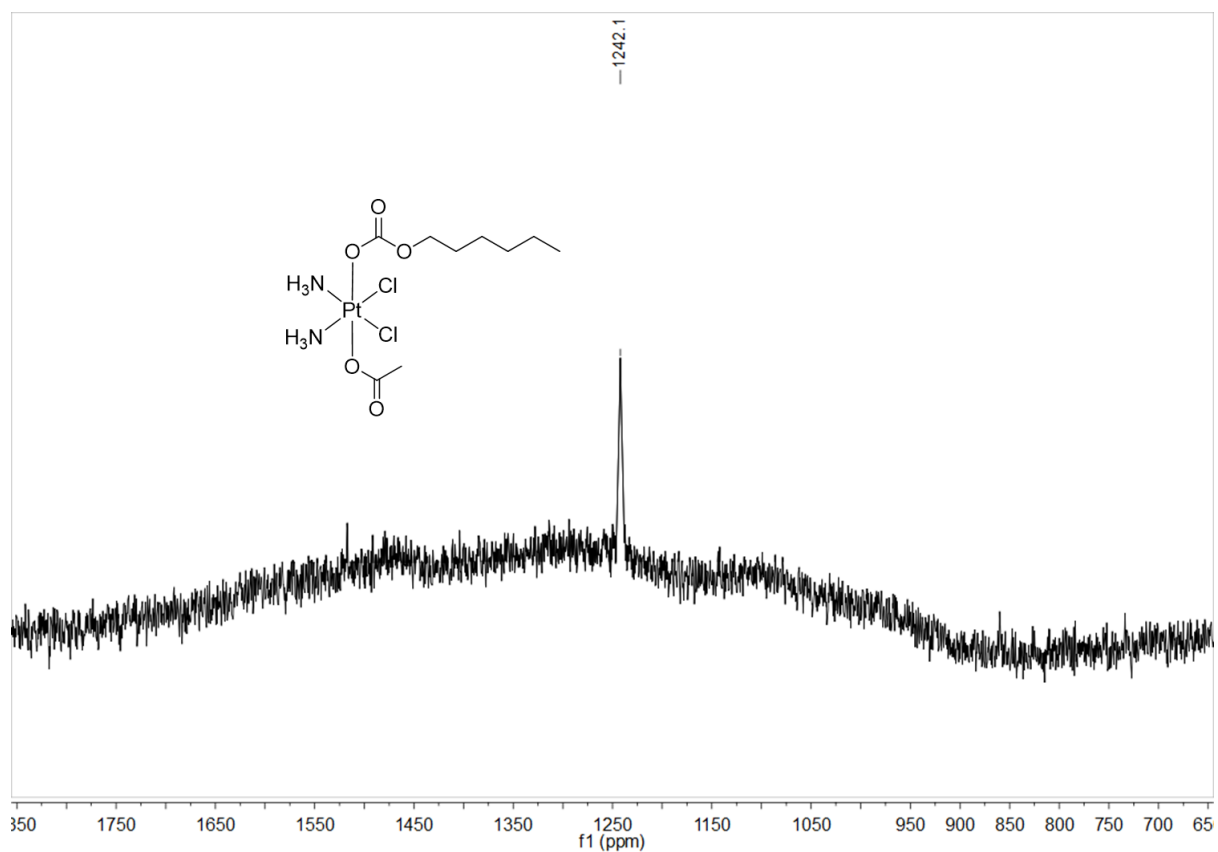

**Figure S12.**  $^{195}\text{Pt}$  NMR spectrum of complex  $c,t,c$ - $[\text{Pt}(\text{NH}_3)_2(\text{OCOOCH}_2\text{CH}_2\text{CH}_2\text{CH}_2\text{CH}_2\text{CH}_3)(\text{OCOCH}_3)(\text{Cl})_2]$  **1a'** in  $\text{DMSO-}d_6$ .

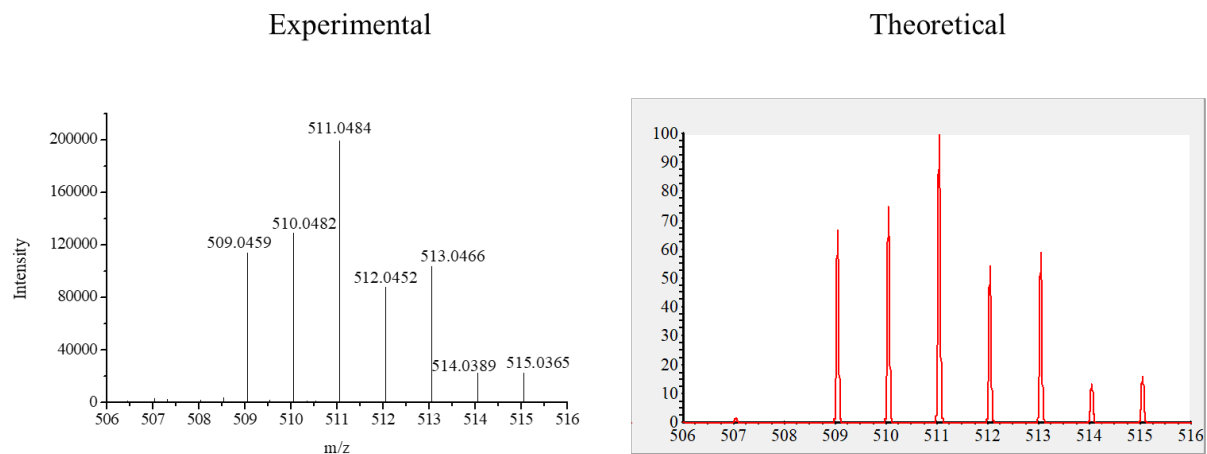

ESI-HRMS (positive ion mode), m/z.  $[M+Na]^+$  calculated for  $C_9H_{22}Cl_2N_2NaO_4Pt$ : 511.0480, found: 511.0484

**Figure S13.** ESI-HRMS spectrum of complex *c,t,c*- $[Pt(NH_3)_2(OCOCH_2CH_2CH_2CH_2CH_2CH_3)(OCOCH_3)(Cl)_2]$  **1b'**.

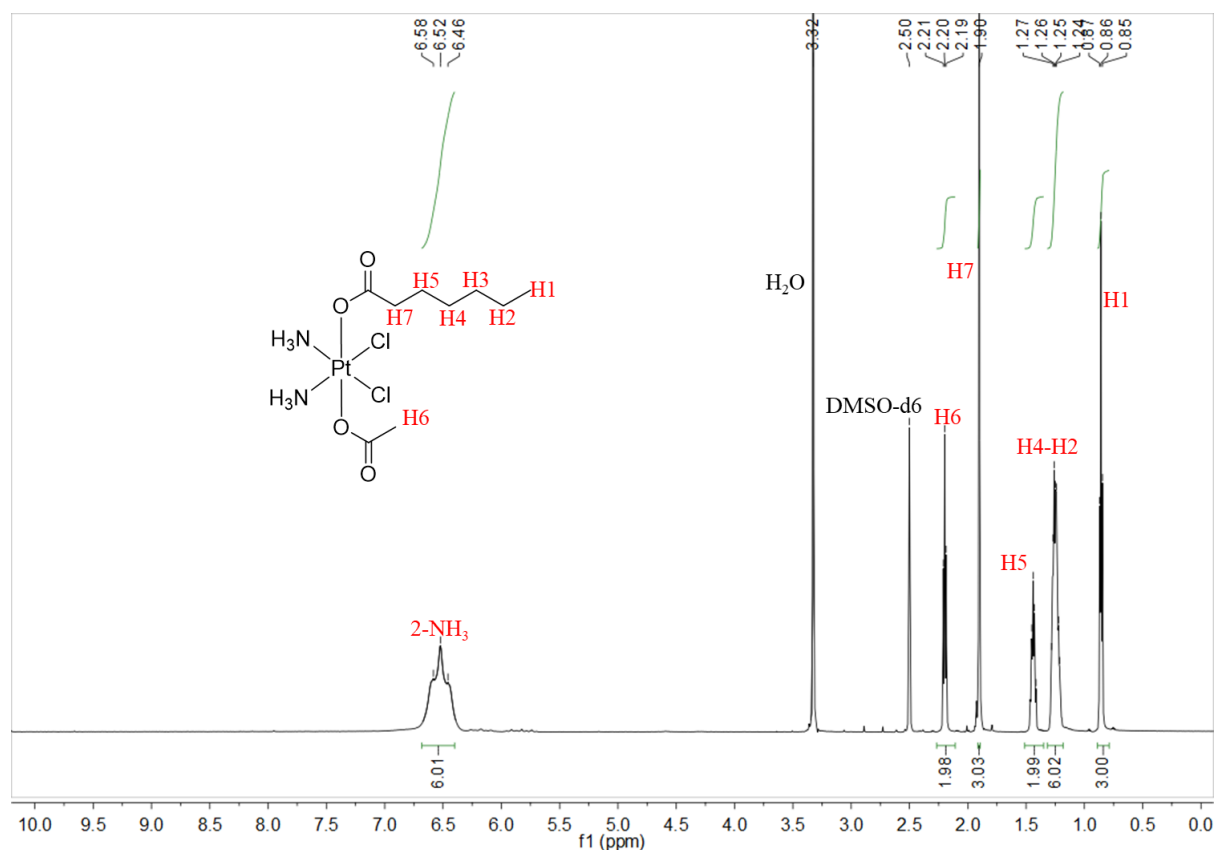

**Figure S14.**  $^1H$  NMR spectrum of complex *c,t,c*- $[Pt(NH_3)_2(OCOCH_2CH_2CH_2CH_2CH_2CH_3)(OCOCH_3)(Cl)_2]$  **1b'** in  $DMSO-d_6$ .

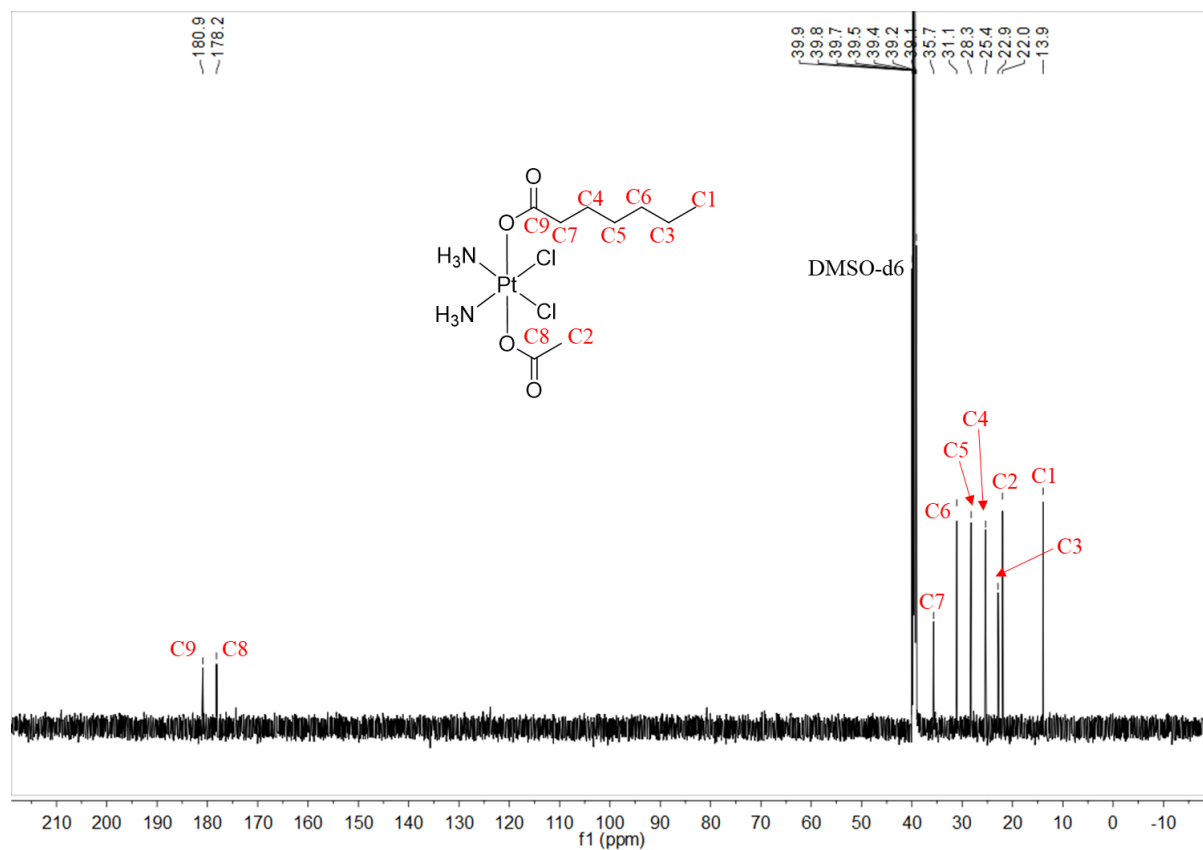

**Figure S15.**  $^{13}\text{C}$  NMR spectrum of complex  $c,t,c$ - $[\text{Pt}(\text{NH}_3)_2(\text{OCOCH}_2\text{CH}_2\text{CH}_2\text{CH}_2\text{CH}_2\text{CH}_3)(\text{OCOCH}_3)(\text{Cl})_2]$  **1b'** in  $\text{DMSO-}d_6$ .

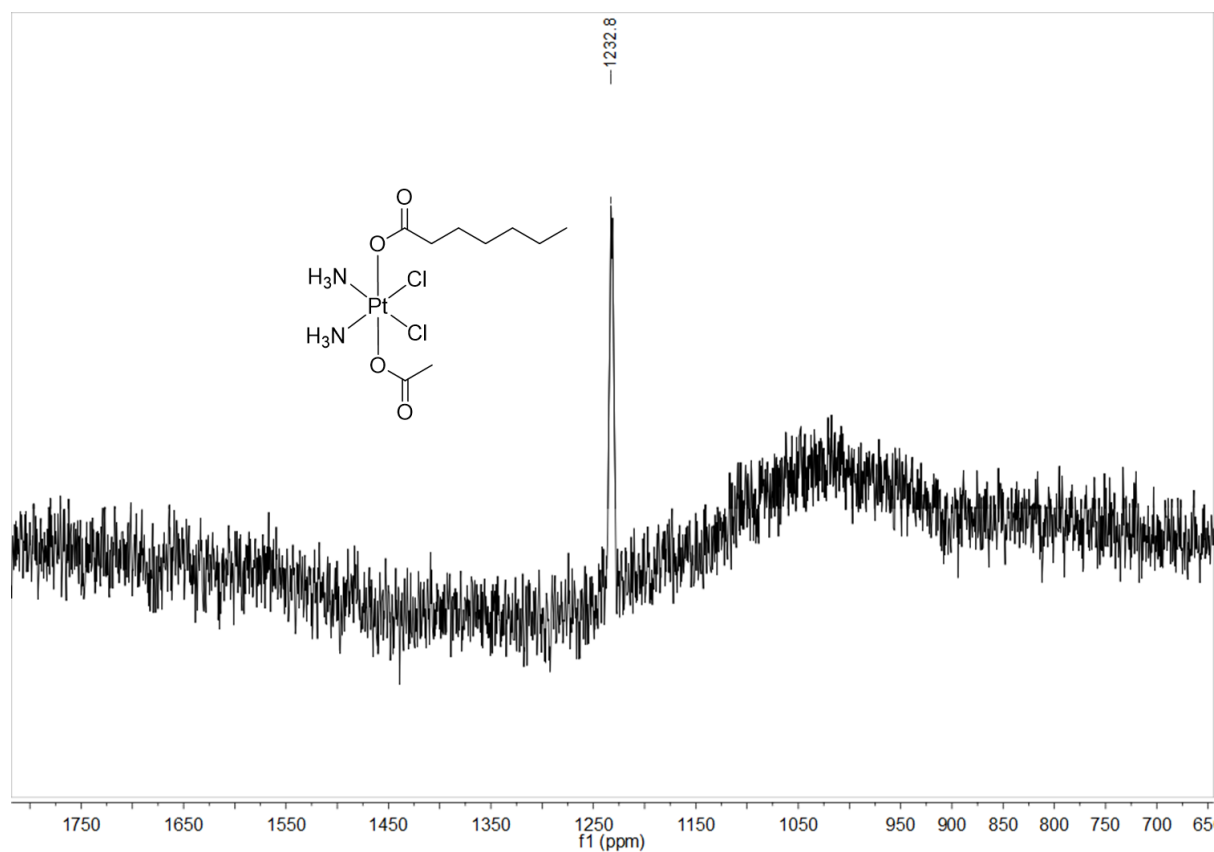

**Figure S16.**  $^{195}\text{Pt}$  NMR spectrum of complex  $c,t,c$ - $[\text{Pt}(\text{NH}_3)_2(\text{OCOCH}_2\text{CH}_2\text{CH}_2\text{CH}_2\text{CH}_2\text{CH}_3)(\text{OCOCH}_3)(\text{Cl})_2]$  **1b'** in  $\text{DMSO-}d_6$ .

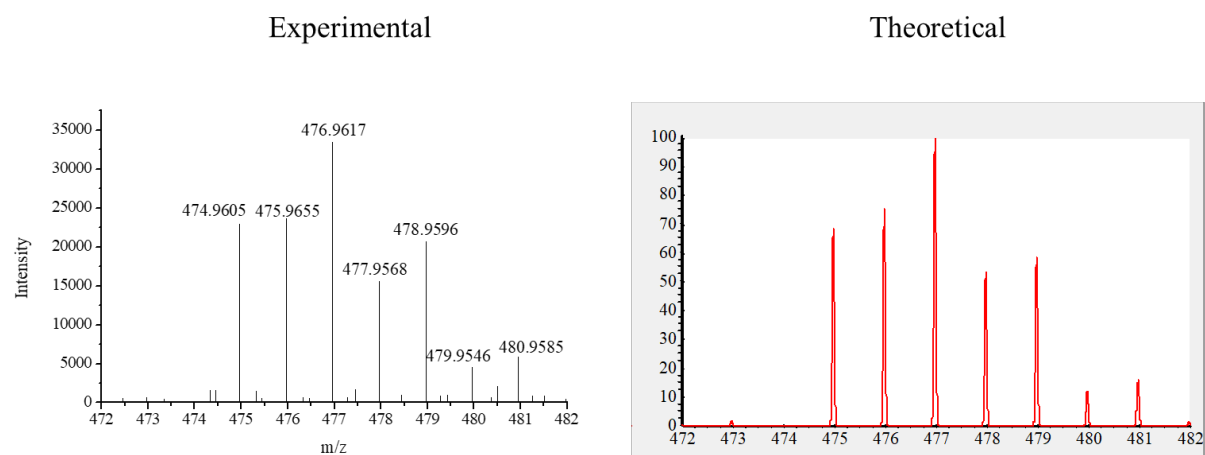

ESI-HRMS (positive ion mode), m/z.  $[M+Na]^+$  calculated for  $C_7H_{12}Cl_2N_2NaO_4Pt$ : 476.9697, found: 476.9617

**Figure S17.** ESI-HRMS spectrum of complex  $c,t,c$ - $[Pt(NH_3)_2(OCOOPh)(OH)(Cl)_2]$  **2a**.

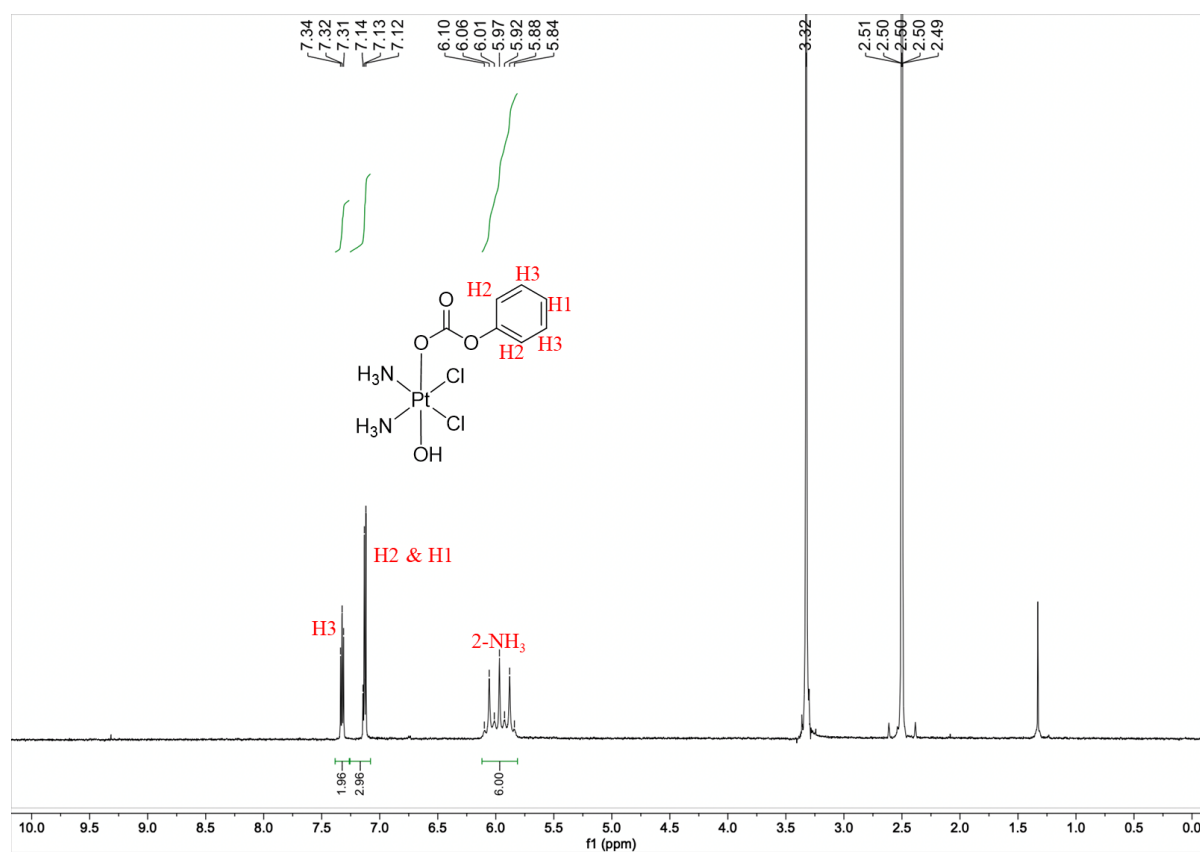

**Figure S18.**  $^1H$  NMR spectrum of complex  $c,t,c$ - $[Pt(NH_3)_2(OCOOPh)(OH)(Cl)_2]$  **2a** in  $DMSO-d_6$ .

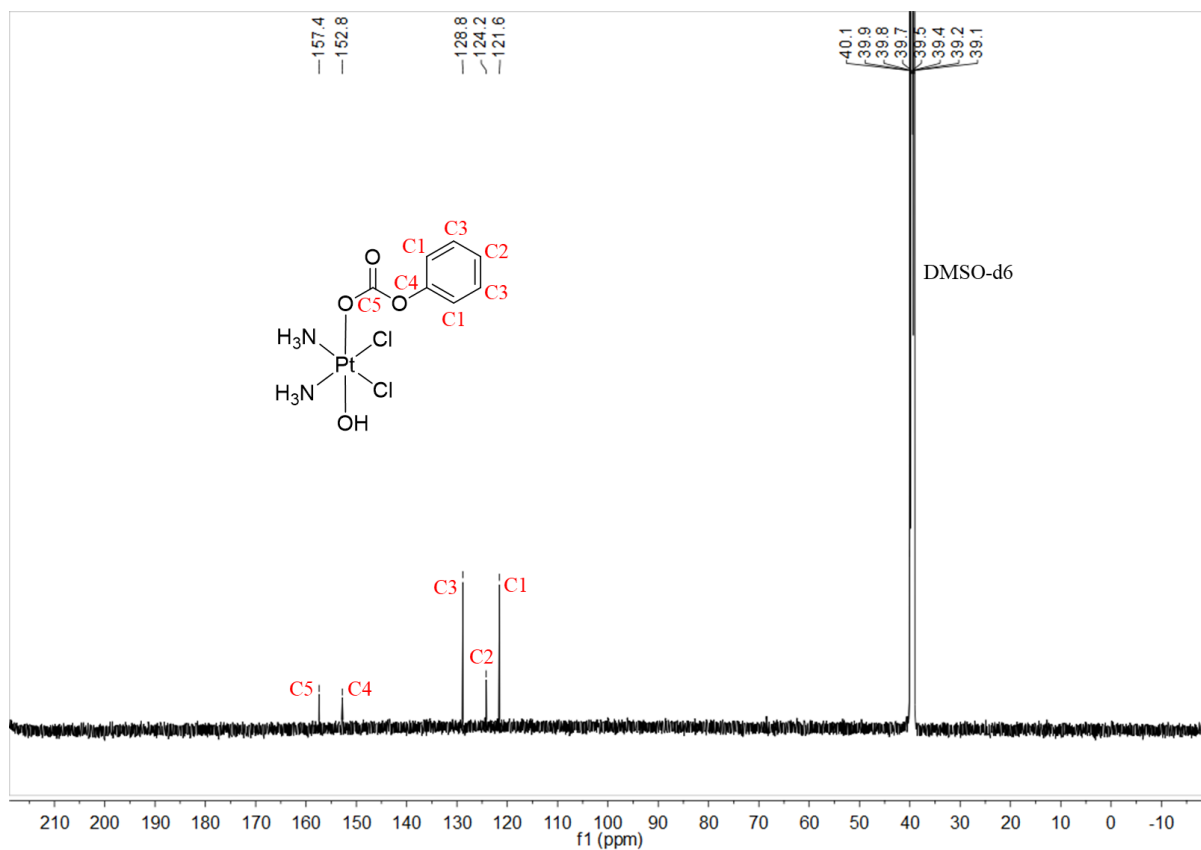

**Figure S19.** <sup>13</sup>C NMR spectrum of complex  $c,t,c$ -[Pt(NH<sub>3</sub>)<sub>2</sub>(OCOOPh)(OH)(Cl)<sub>2</sub>] **2a** in DMSO-*d*<sub>6</sub>.

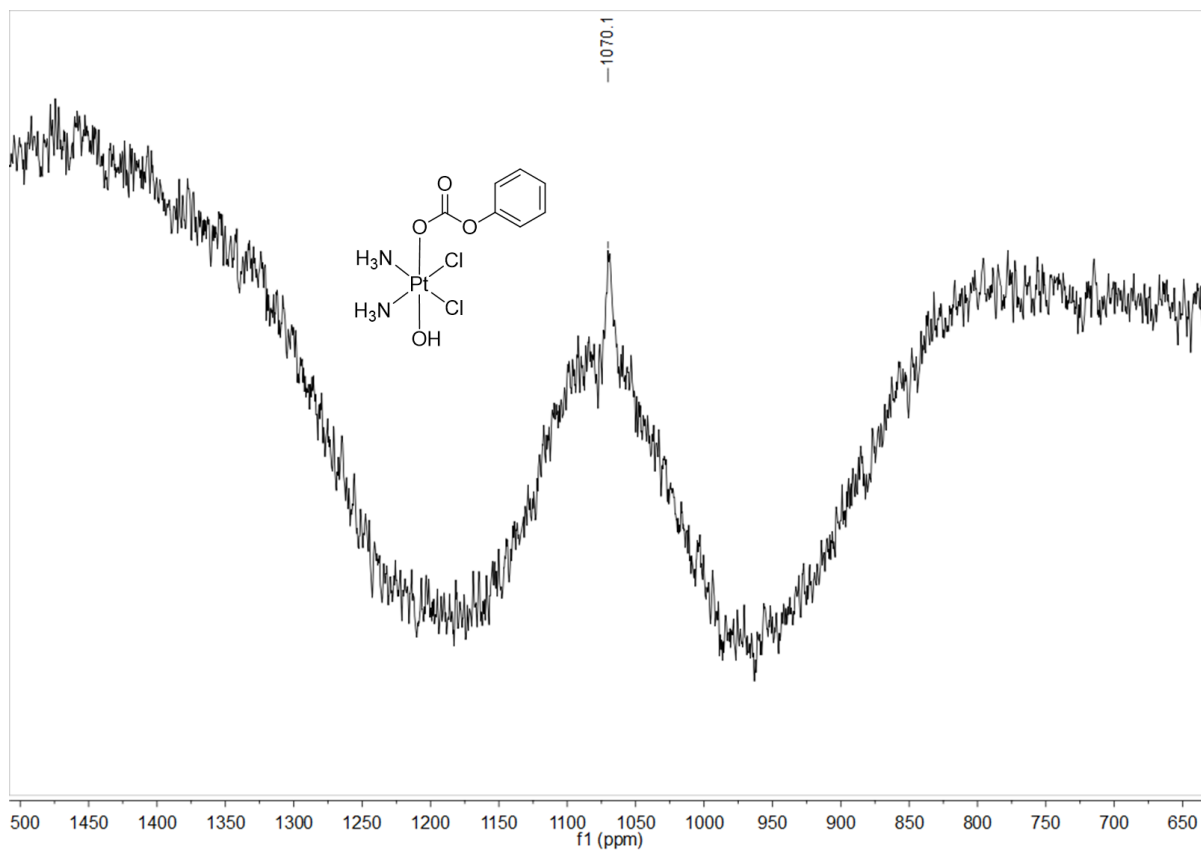

**Figure S20.** <sup>195</sup>Pt NMR spectrum of complex  $c,t,c$ -[Pt(NH<sub>3</sub>)<sub>2</sub>(OCOOPh)(OH)(Cl)<sub>2</sub>] **2a** in DMSO-*d*<sub>6</sub>.



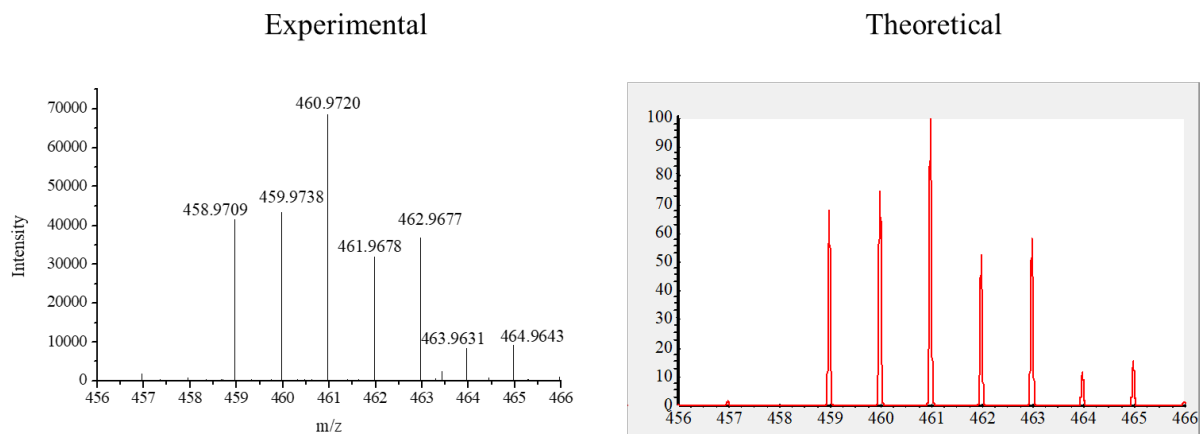

ESI-HRMS (positive ion mode), m/z.  $[M+Na]^+$  calculated for  $C_7H_{12}Cl_2N_2NaO_3Pt$ : 460.9748, found: 460.9720

**Figure S21.** ESI-HRMS spectrum of complex  $c,t,c$ - $[Pt(NH_3)_2(OCOPh)(OH)(Cl)_2]$  **2b**.

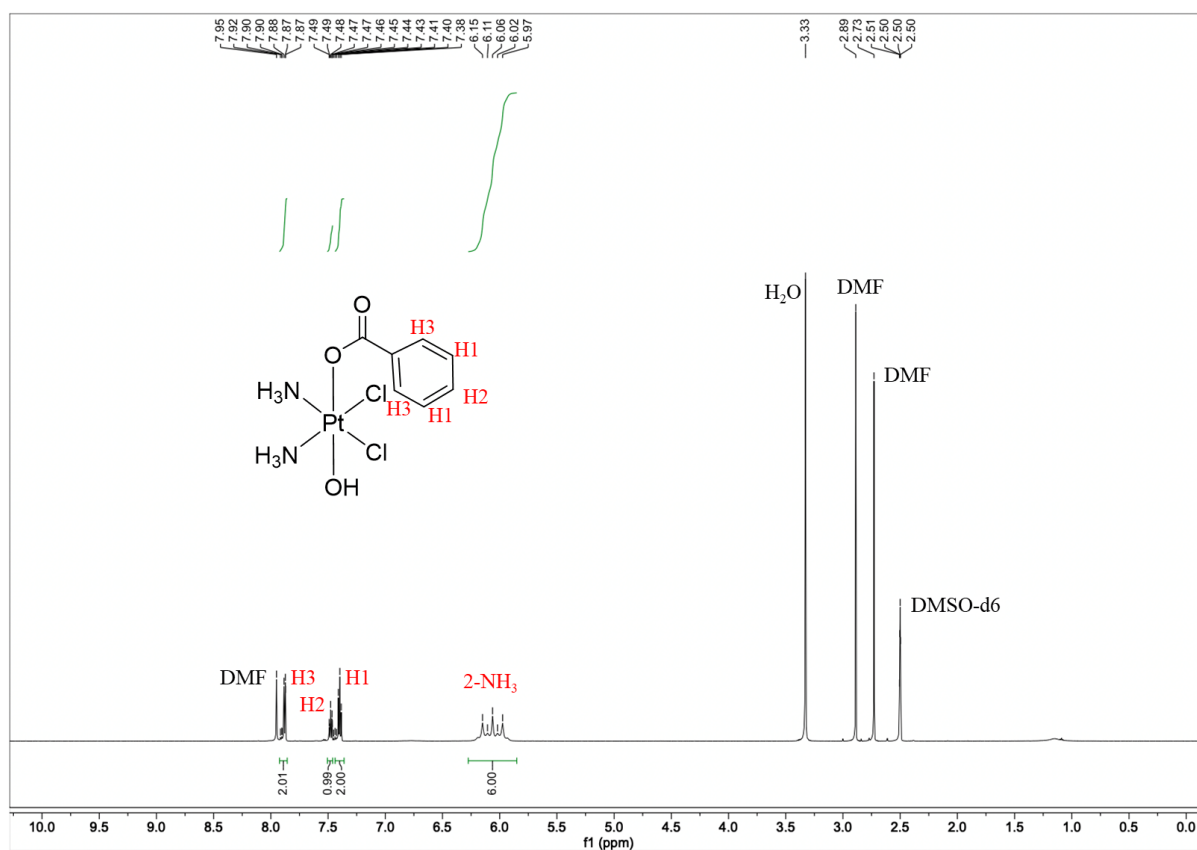

**Figure S22.**  $^1H$  NMR spectrum of complex  $c,t,c$ - $[Pt(NH_3)_2(OCOPh)(OH)(Cl)_2]$  **2b** in  $DMSO-d_6$ .

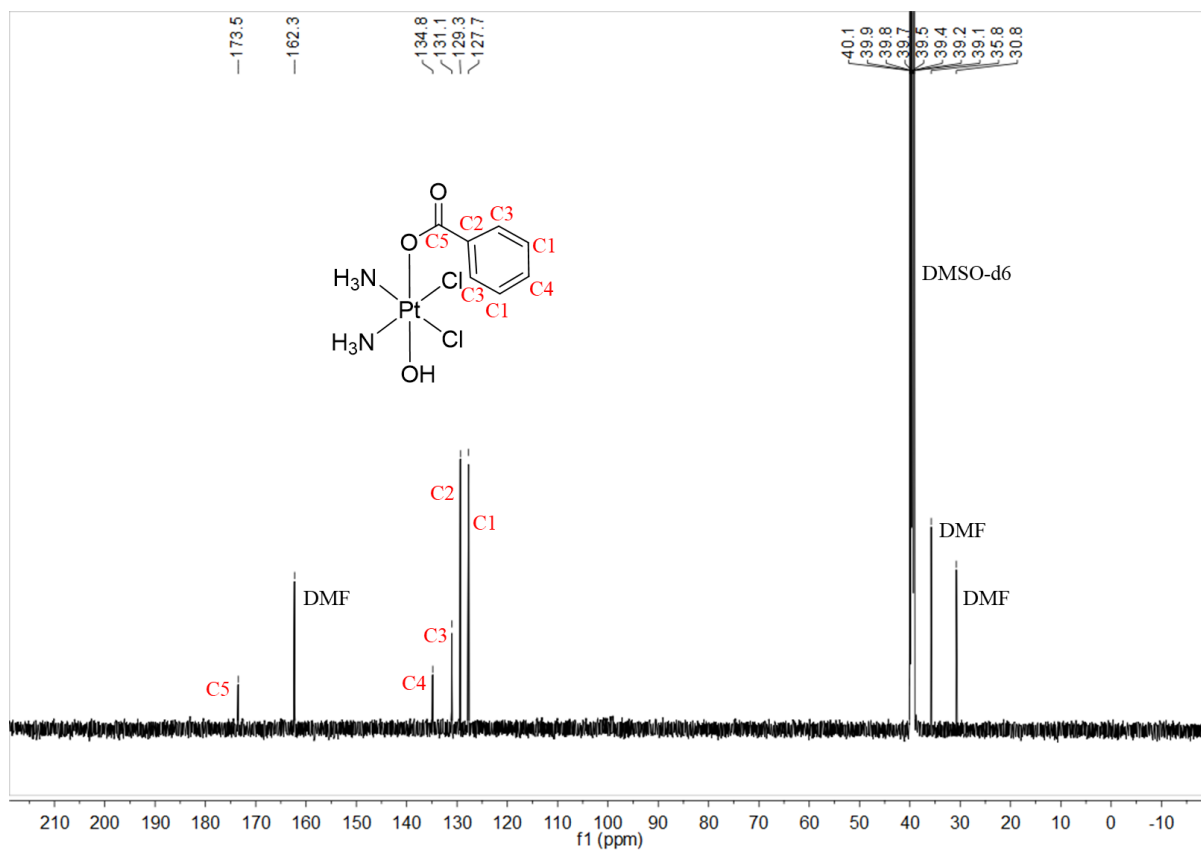

**Figure S23.**  $^{13}\text{C}$  NMR spectrum of complex  $c,t,c$ -[Pt(NH<sub>3</sub>)<sub>2</sub>(OCOPh)(OH)(Cl)<sub>2</sub>] **2b** in DMSO-*d*<sub>6</sub>.

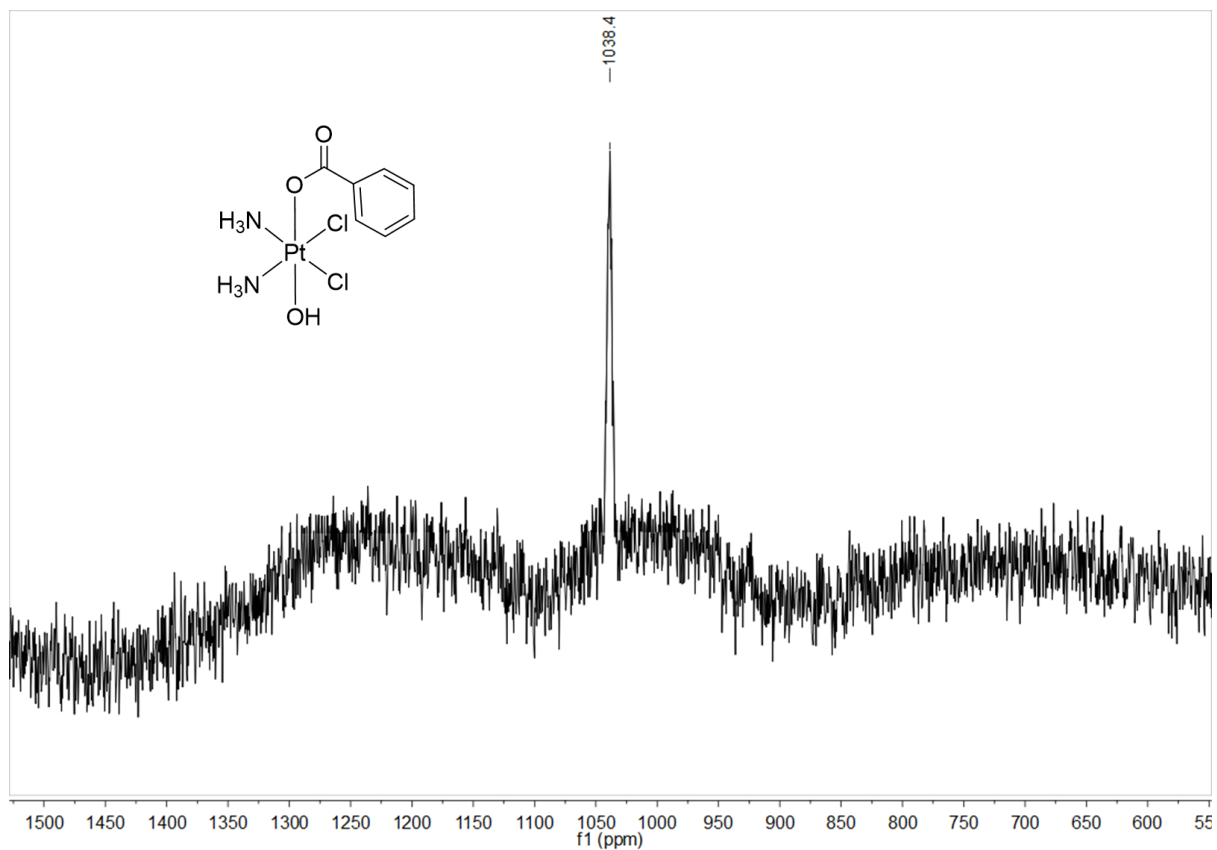

**Figure S24.**  $^{195}\text{Pt}$  NMR spectrum of complex  $c,t,c$ -[Pt(NH<sub>3</sub>)<sub>2</sub>(OCOPh)(OH)(Cl)<sub>2</sub>] **2b** in DMSO-*d*<sub>6</sub>.

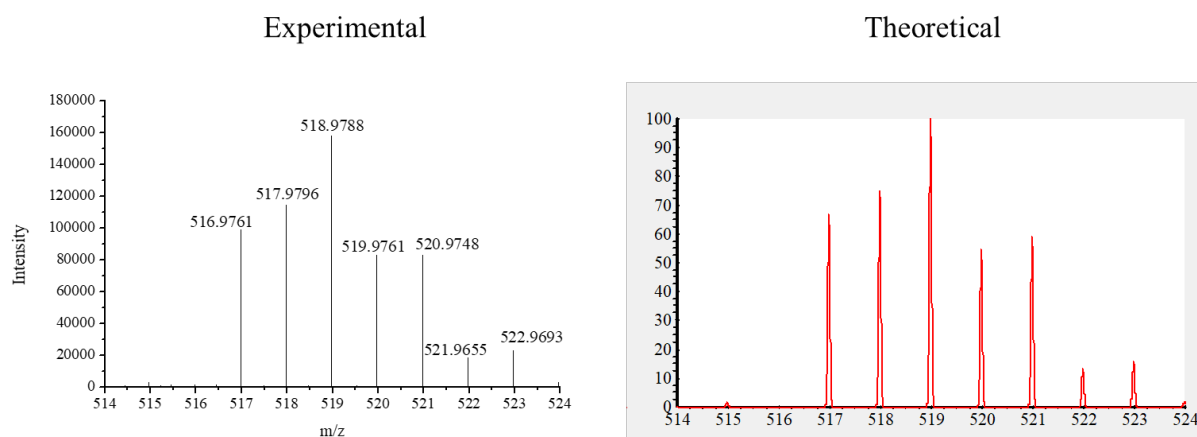

ESI-HRMS (positive ion mode), m/z.  $[M+Na]^+$  calculated for  $C_9H_{14}Cl_2N_2NaO_5Pt$ : 518.9803, found: 518.9788

**Figure S25.** ESI-HRMS spectrum of complex *c,t,c*- $[Pt(NH_3)_2(OCOOPh)(OCOCH_3)(Cl)_2]$  **2a'**.

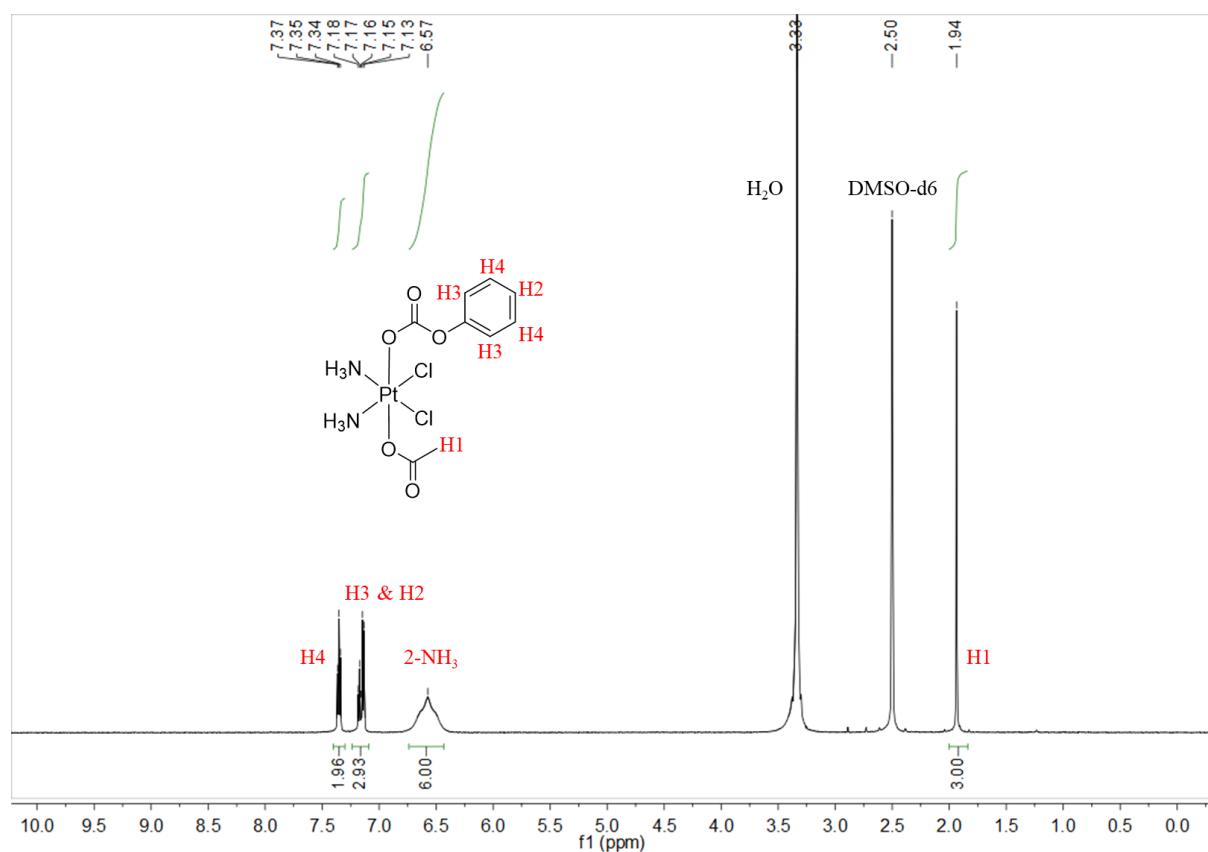

**Figure S26.**  $^1H$  NMR spectrum of complex *c,t,c*- $[Pt(NH_3)_2(OCOOPh)(OCOCH_3)(Cl)_2]$  **2a'** in  $DMSO-d_6$ .

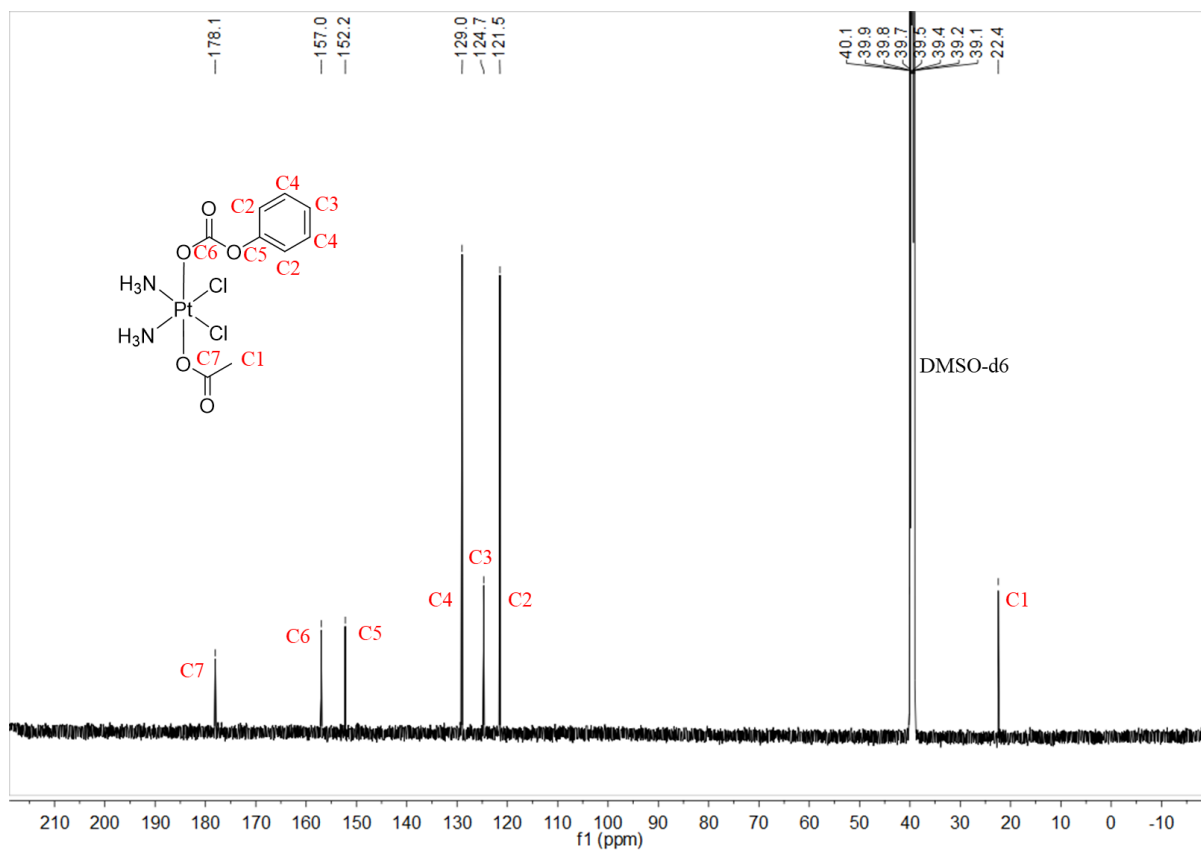

**Figure S27.** <sup>13</sup>C NMR spectrum of complex  $c,t,c$ -[Pt(NH<sub>3</sub>)<sub>2</sub>(OCOOPh)(OCOCH<sub>3</sub>)(Cl)<sub>2</sub>] **2a'** in DMSO-*d*<sub>6</sub>.

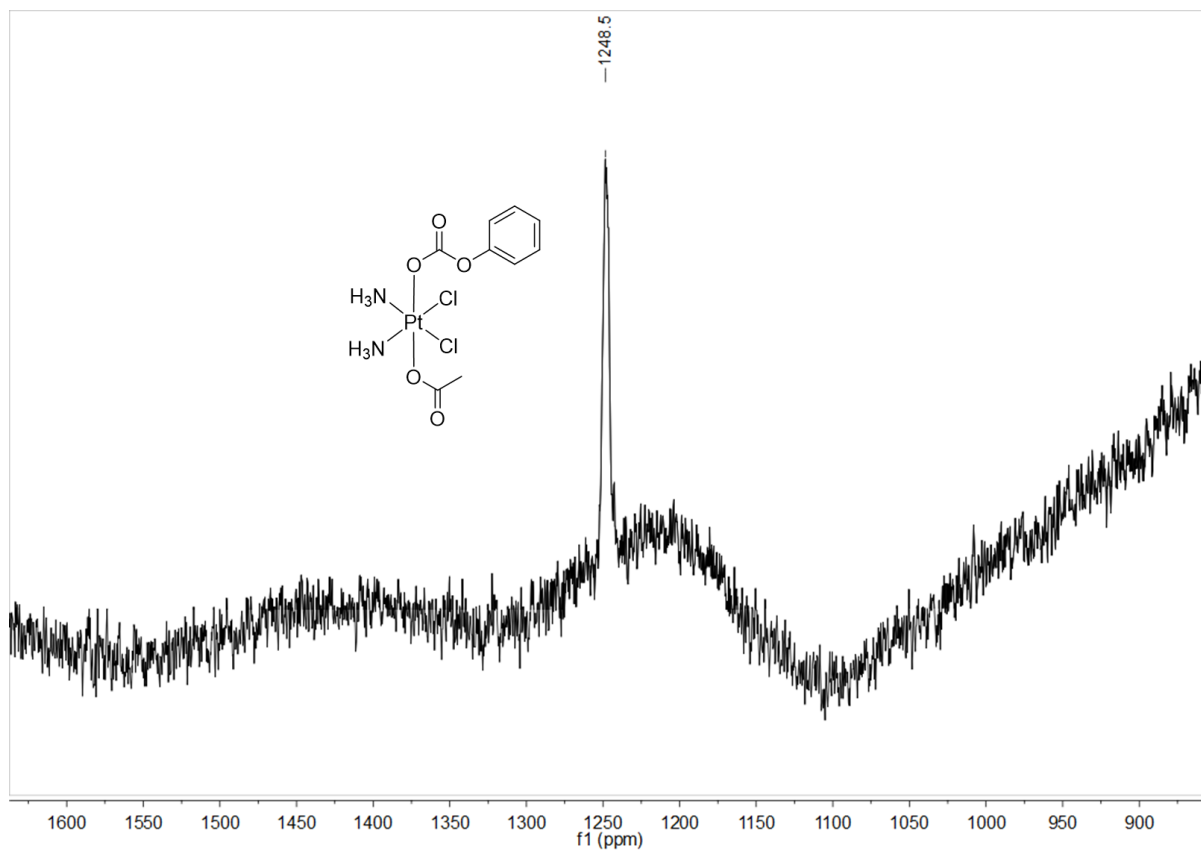

**Figure S28.** <sup>195</sup>Pt NMR spectrum of complex  $c,t,c$ -[Pt(NH<sub>3</sub>)<sub>2</sub>(OCOOPh)(OCOCH<sub>3</sub>)(Cl)<sub>2</sub>] **2a'** in DMSO-*d*<sub>6</sub>.

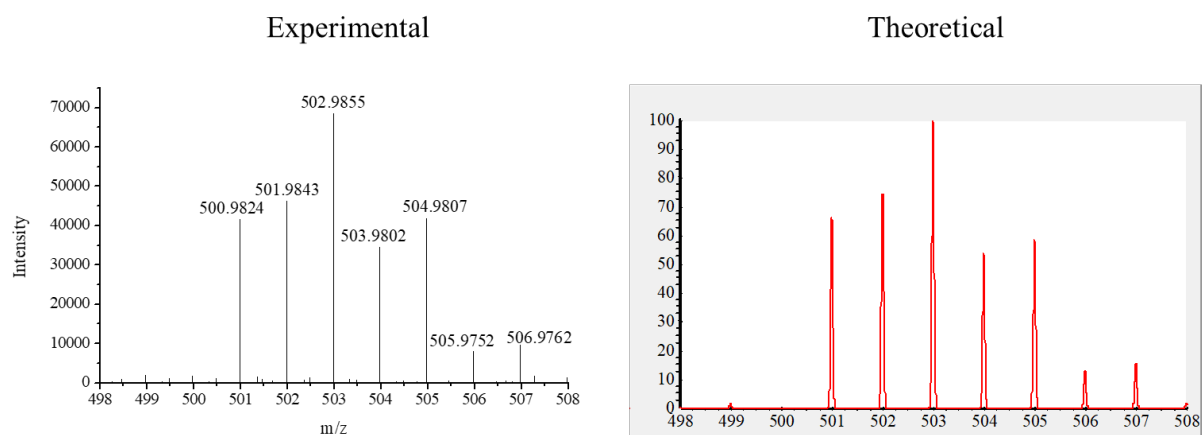

ESI-HRMS (positive ion mode), m/z.  $[M+Na]^+$  calculated for  $C_9H_{14}Cl_2N_2NaO_4Pt$ : 502.9854, found: 502.9855

**Figure S29.** ESI-HRMS spectrum of complex  $c,t,c$ - $[Pt(NH_3)_2(OCOPh)(OCOCH_3)(Cl)_2]$  **2b'**.

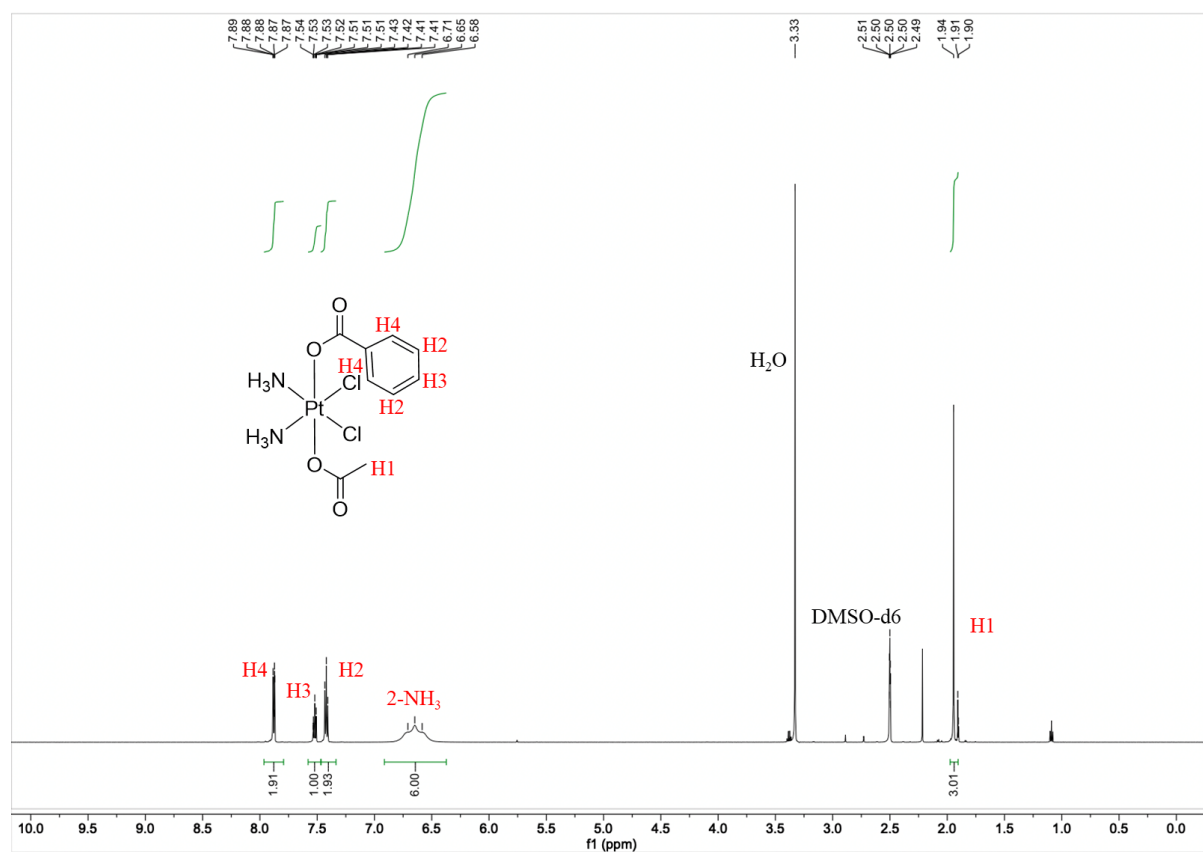

**Figure S30.**  $^1H$  NMR spectrum of complex  $c,t,c$ - $[Pt(NH_3)_2(OCOPh)(OCOCH_3)(Cl)_2]$  **2b'** in  $DMSO-d_6$ .

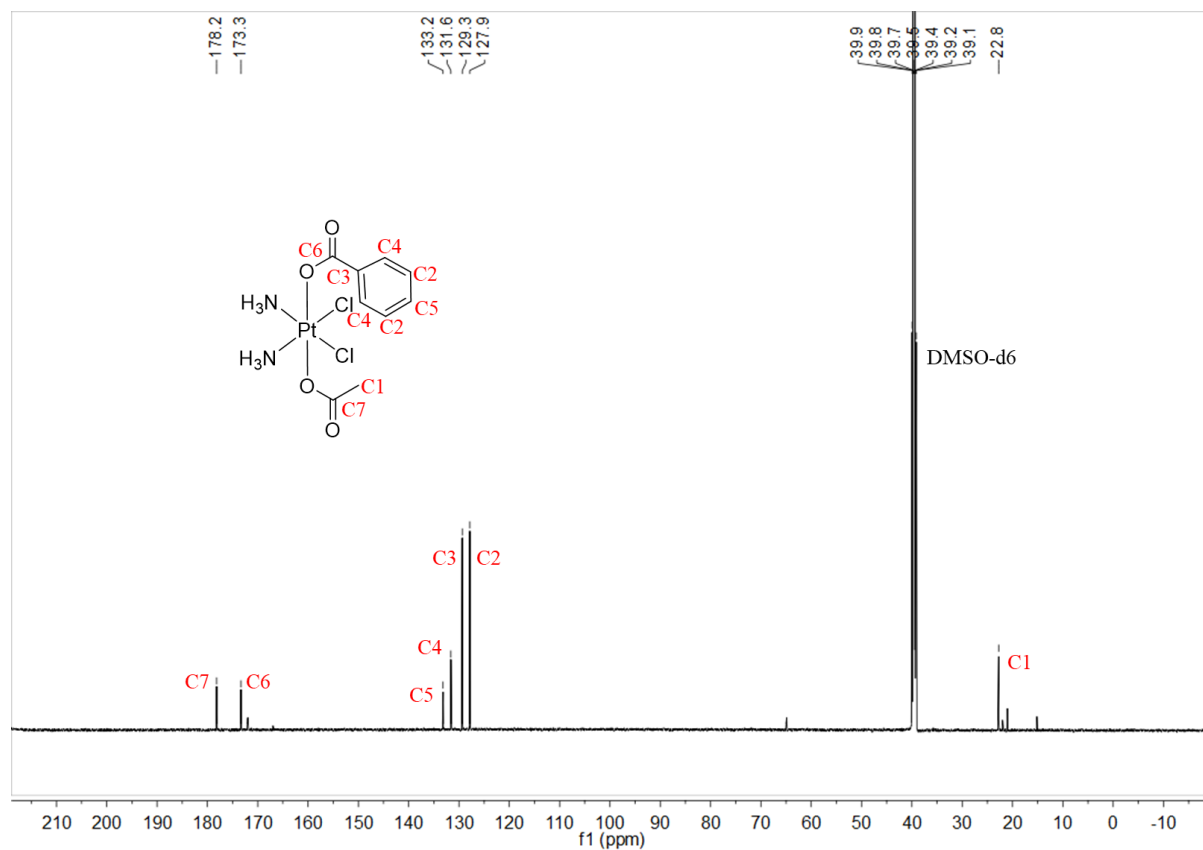

**Figure S31.**  $^{13}\text{C}$  NMR spectrum of complex *c,t,c*- $[\text{Pt}(\text{NH}_3)_2(\text{OCOPh})(\text{OCOCH}_3)(\text{Cl})_2]$  **2b'** in  $\text{DMSO-}d_6$ .

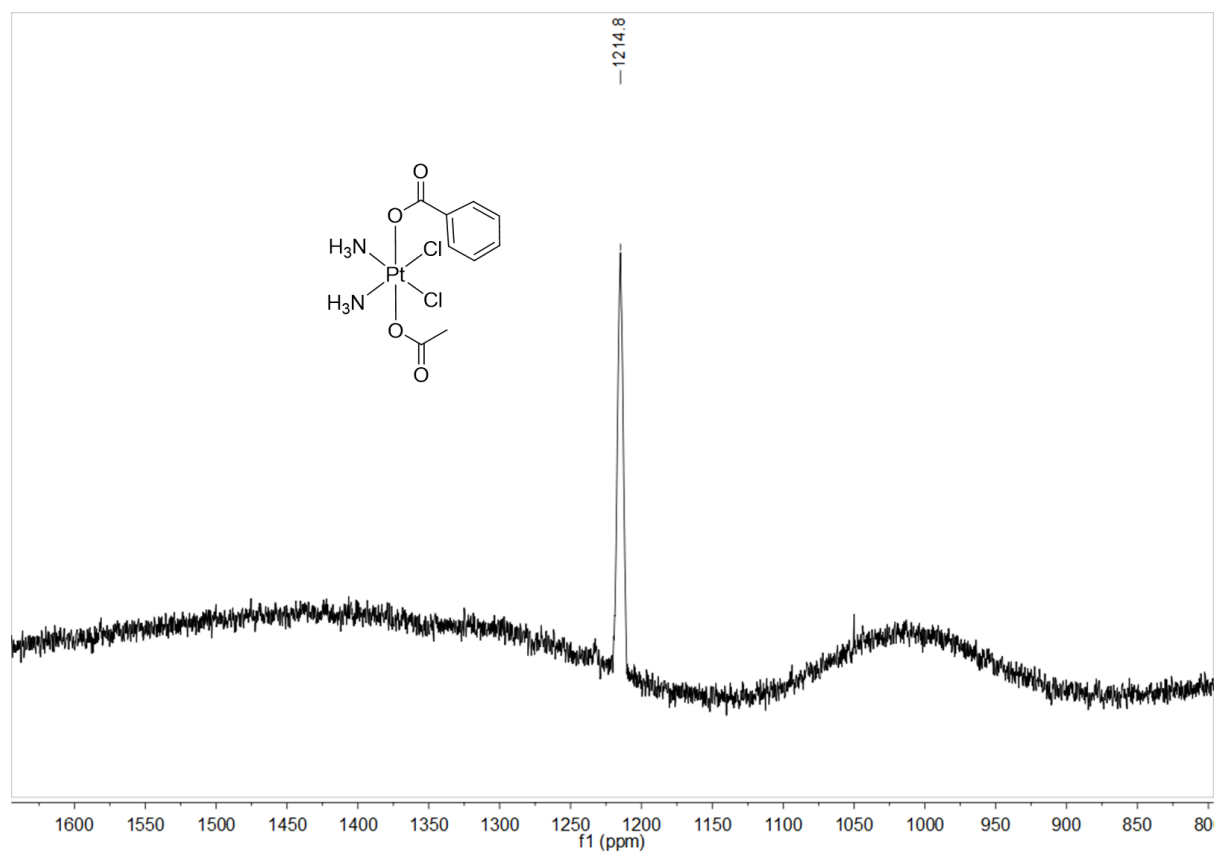

**Figure S32.**  $^{13}\text{C}$  NMR spectrum of complex *c,t,c*- $[\text{Pt}(\text{NH}_3)_2(\text{OCOPh})(\text{OCOCH}_3)(\text{Cl})_2]$  **2b'** in  $\text{DMSO-}d_6$ .

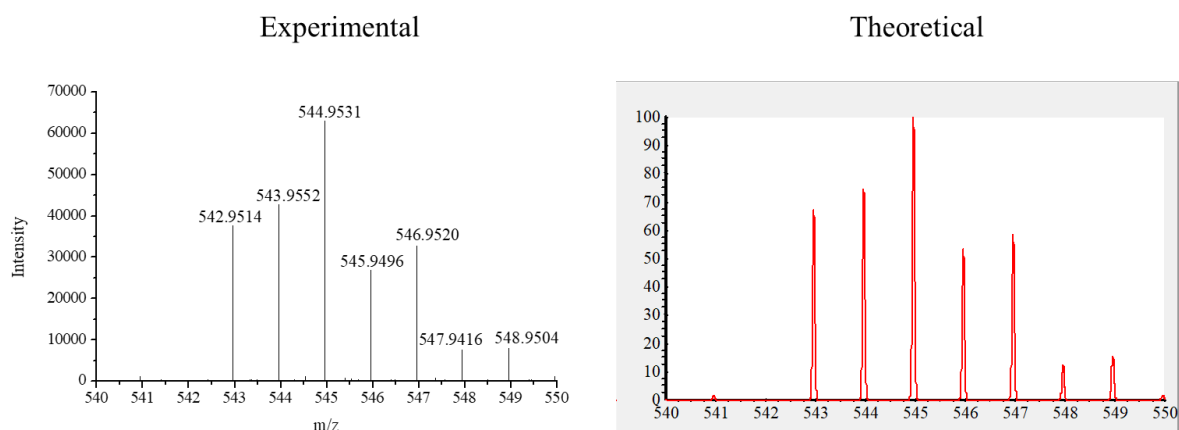

ESI-HRMS (positive ion mode), m/z.  $[M+Na]^+$  calculated for  $C_8H_{11}Cl_2F_3N_2NaO_4Pt$ : 544.9571, found: 544.9531

**Figure S33.** ESI-HRMS spectrum of complex  $c,t,c$ - $[Pt(NH_3)_2(OCOOPhCF_3)(OH)(Cl)_2]$  **3a**.

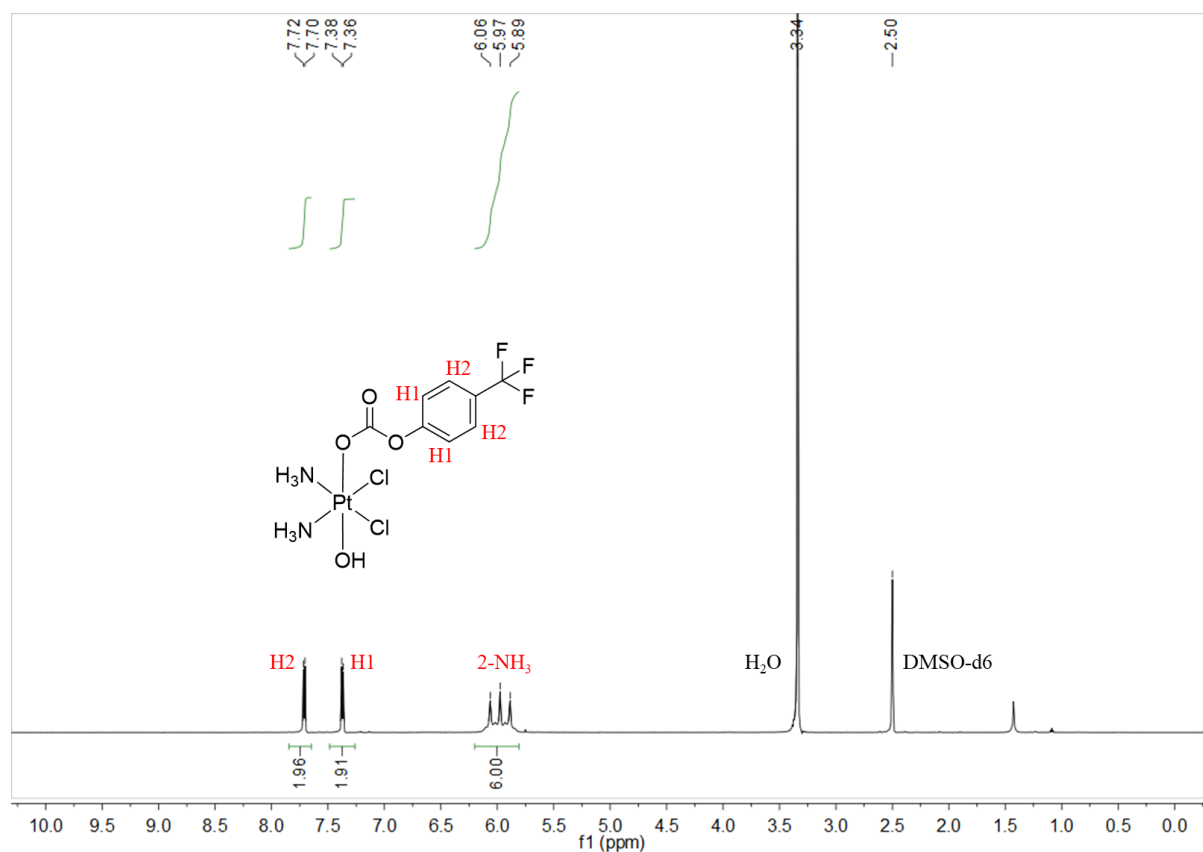

**Figure S34.**  $^1H$  NMR spectrum of complex  $c,t,c$ - $[Pt(NH_3)_2(OCOOPhCF_3)(OH)(Cl)_2]$  **3a** in  $DMSO-d_6$ .

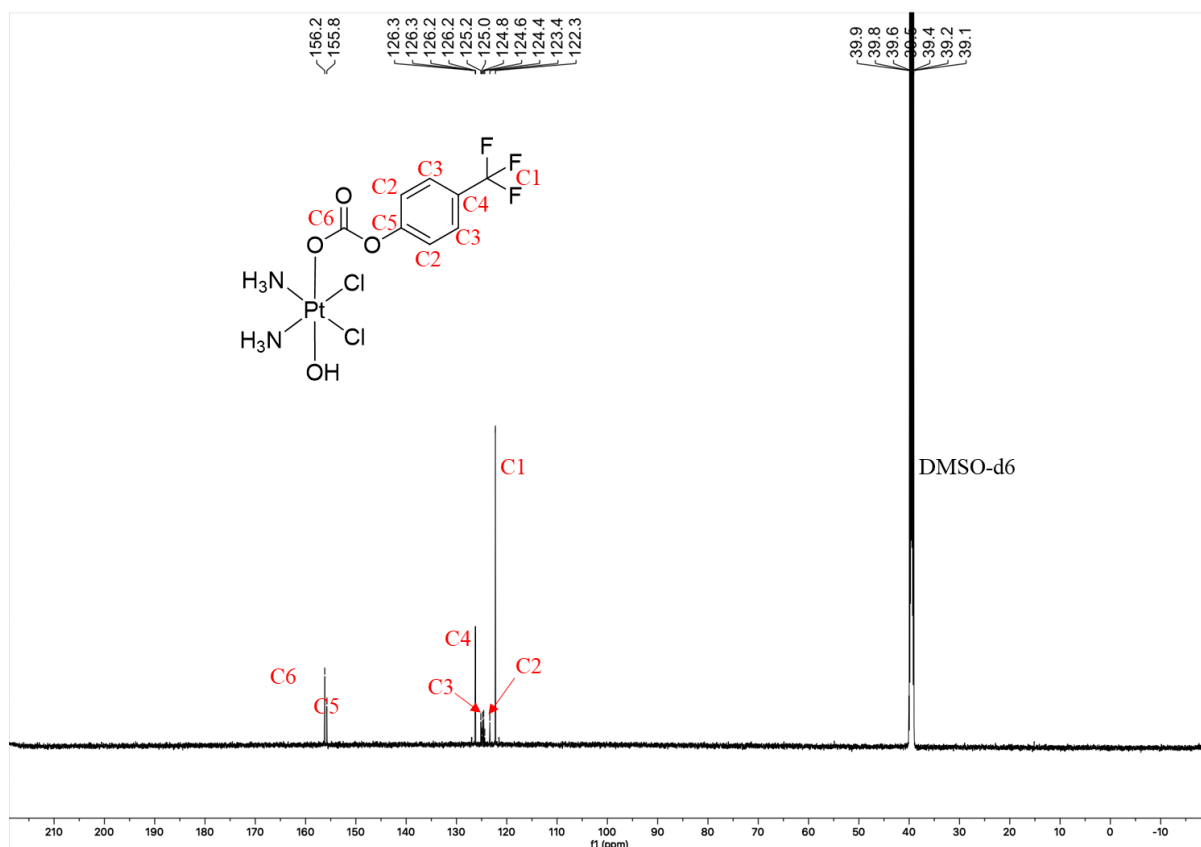

**Figure S35.**  $^{13}\text{C}$  NMR spectrum of complex  $c,t,c$ - $[\text{Pt}(\text{NH}_3)_2(\text{OCOOPhCF}_3)(\text{OH})(\text{Cl})_2]$  **3a** in  $\text{DMSO-}d_6$ .

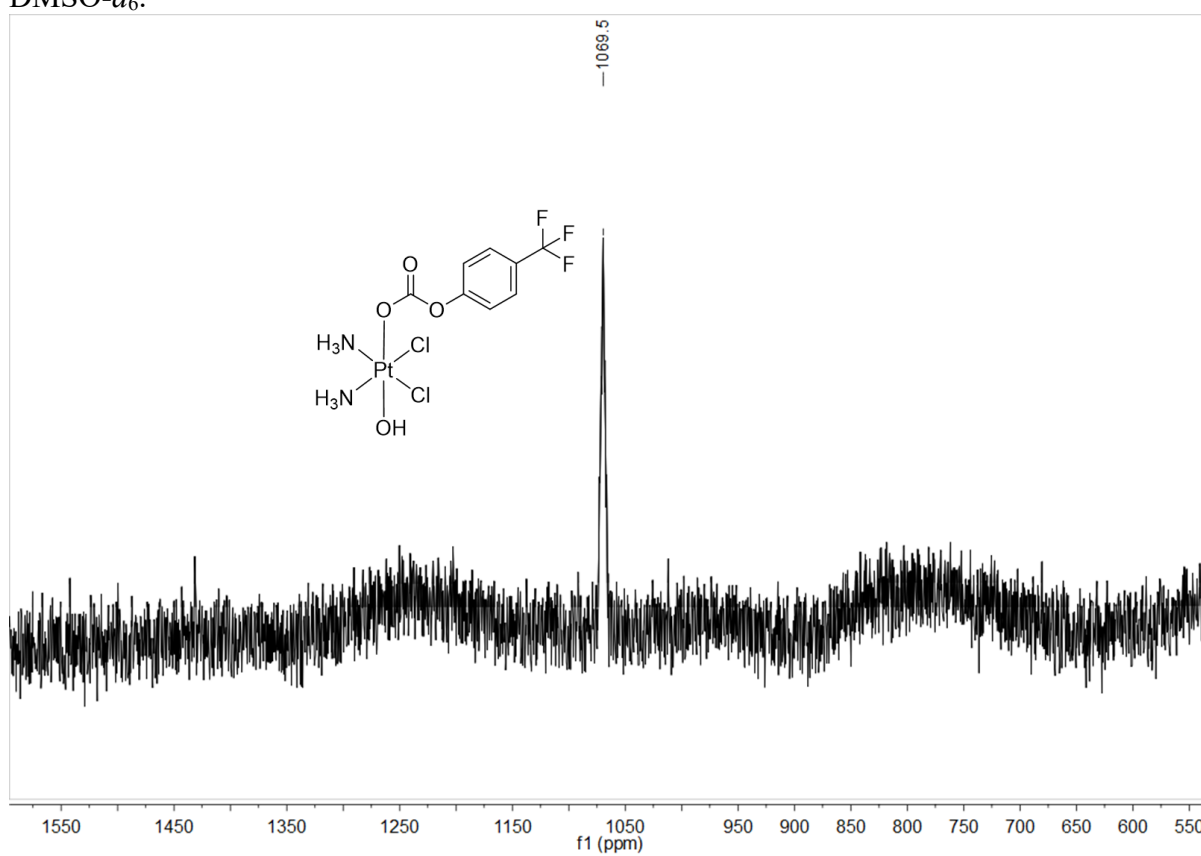

**Figure S36.**  $^{195}\text{Pt}$  NMR spectrum of complex  $c,t,c$ - $[\text{Pt}(\text{NH}_3)_2(\text{OCOOPhCF}_3)(\text{OH})(\text{Cl})_2]$  **3a** in  $\text{DMSO-}d_6$ .



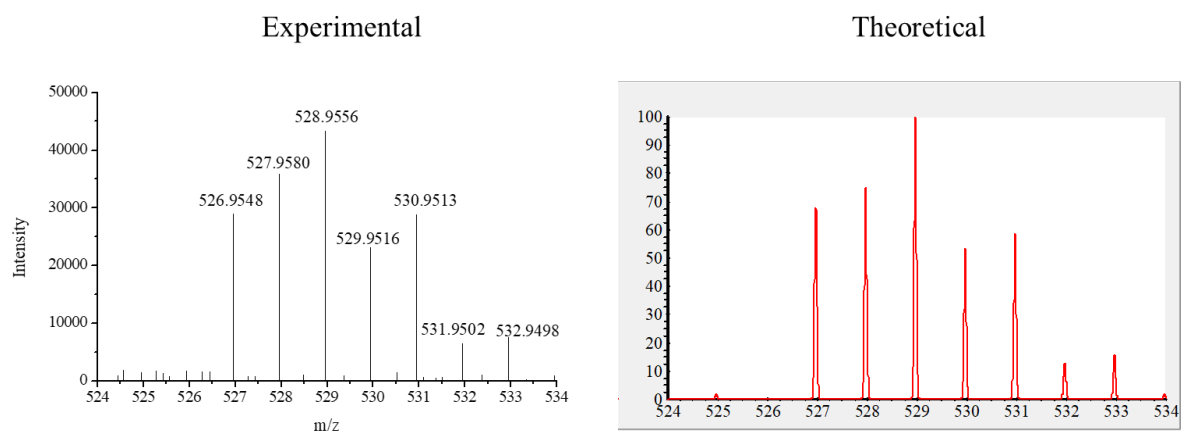

ESI-HRMS (positive ion mode), m/z.  $[M+Na]^+$  calculated for  $C_8H_{11}Cl_2F_3N_2NaO_3Pt$ : 528.9622, found: 528.9556

**Figure S37.** ESI-HRMS spectrum of complex  $c,t,c$ - $[Pt(NH_3)_2(OCOOPhCF_3)(OH)(Cl)_2]$  **3b**.

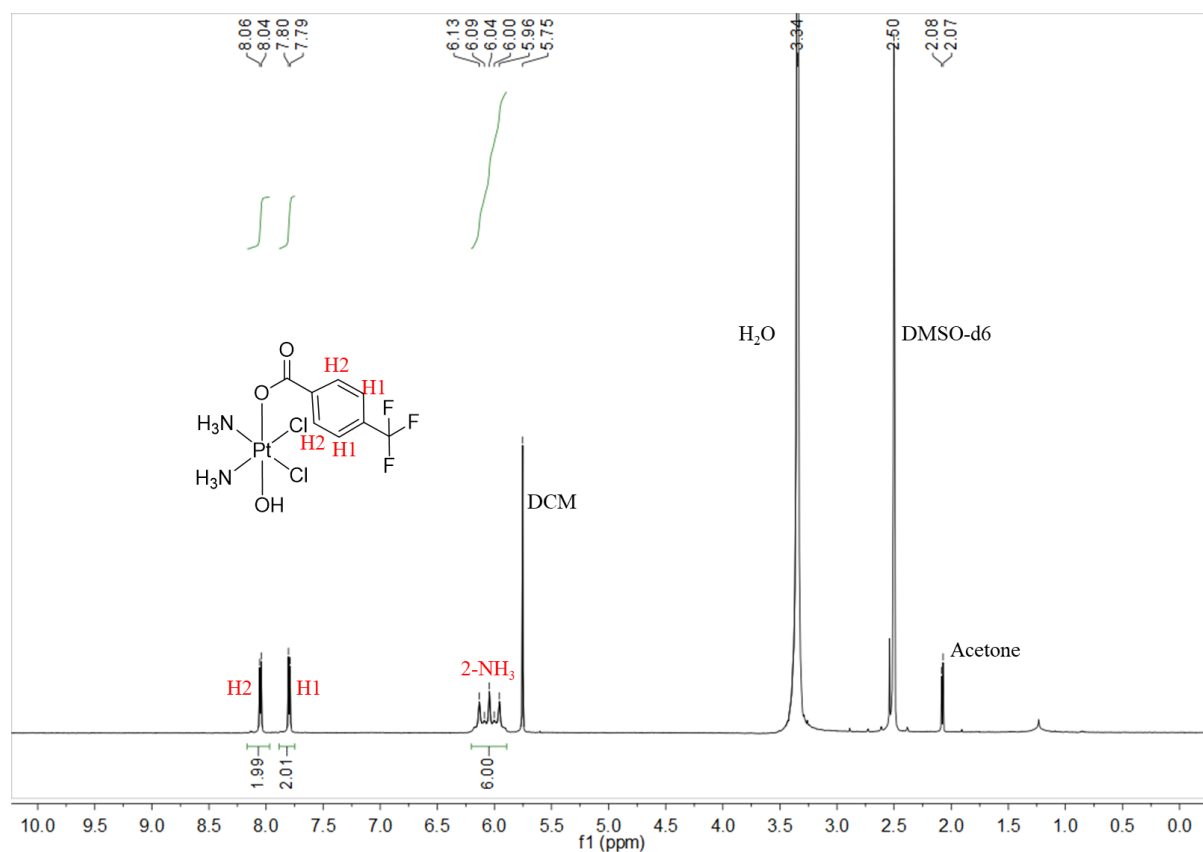

**Figure S38.**  $^1H$  NMR spectrum of complex  $c,t,c$ - $[Pt(NH_3)_2(OCOPhCF_3)(OH)(Cl)_2]$  **3b** in  $DMSO-d_6$ .

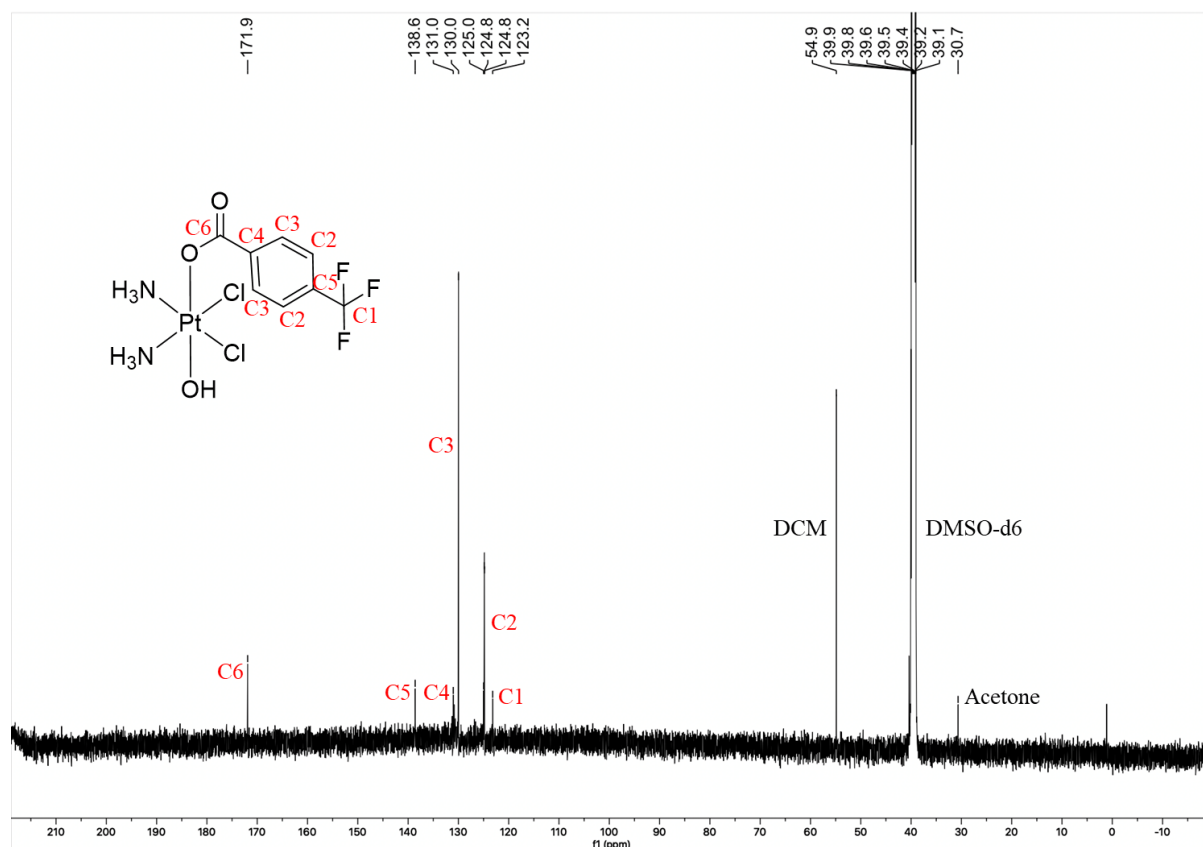

**Figure S39.**  $^{13}\text{C}$  NMR spectrum of complex  $c,t,c$ - $[\text{Pt}(\text{NH}_3)_2(\text{OCOPhCF}_3)(\text{OH})(\text{Cl})_2]$  **3b** in  $\text{DMSO-}d_6$ .

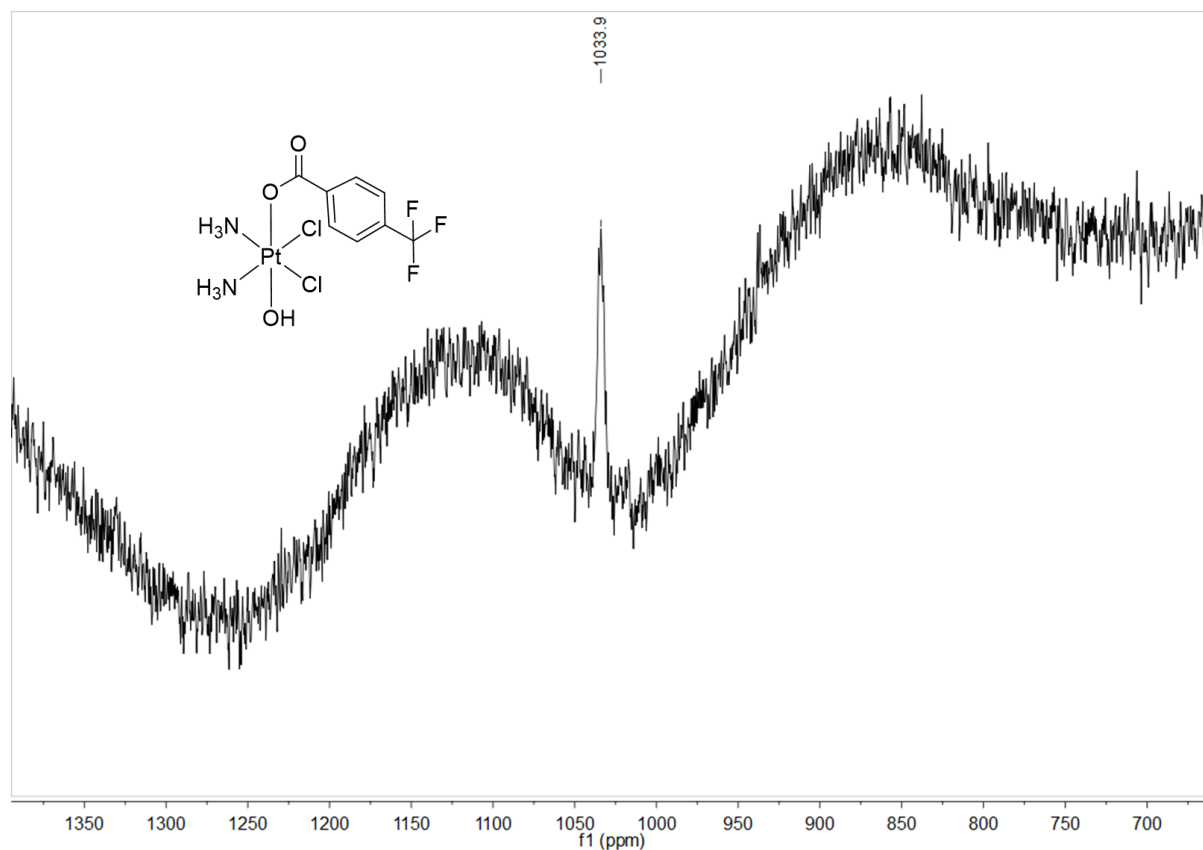

**Figure S40.**  $^{195}\text{Pt}$  NMR spectrum of complex  $c,t,c$ - $[\text{Pt}(\text{NH}_3)_2(\text{OCOPhCF}_3)(\text{OH})(\text{Cl})_2]$  **3b** in  $\text{DMSO-}d_6$ .

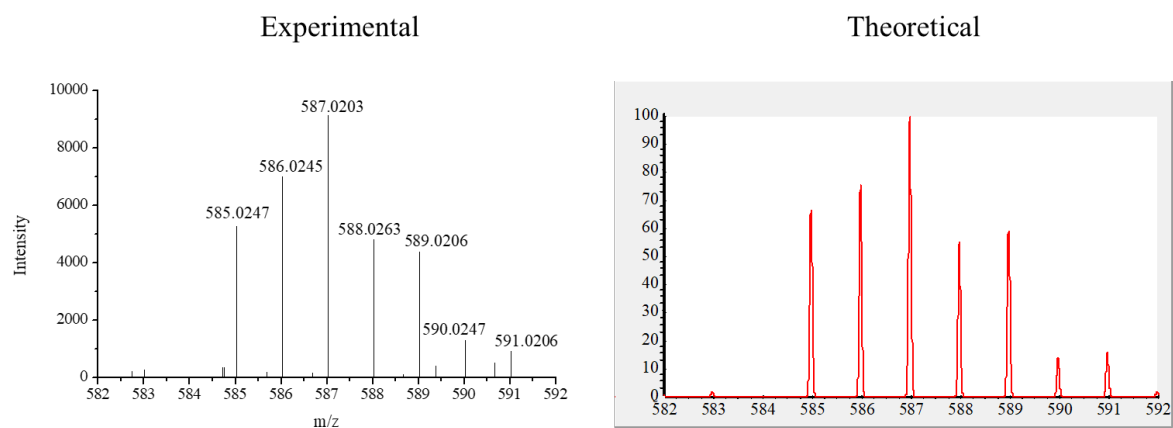

ESI-HRMS (positive ion mode), m/z.  $[M+Na]^+$  calculated for  $C_{10}H_{13}Cl_2F_3N_2NaO_5Pt$ : 586.9678, found: 587.0203

**Figure S41.** ESI-HRMS spectrum of complex *c,t,c*- $[Pt(NH_3)_2(OCOOPhCF_3)(OCOCH_3)(Cl)_2]$  **3a'**.

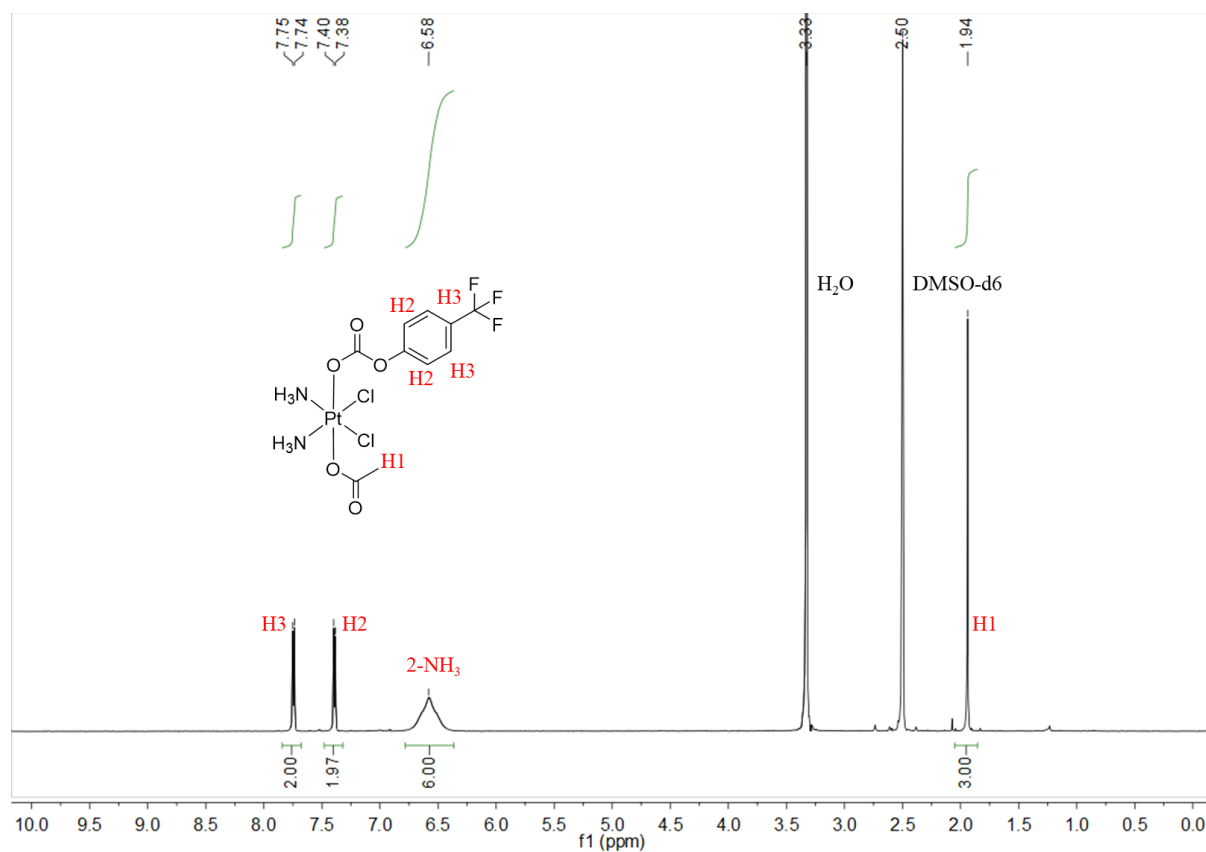

**Figure S42.**  $^1H$  NMR spectrum of complex *c,t,c*- $[Pt(NH_3)_2(OCOOPhCF_3)(OCOCH_3)(Cl)_2]$  **3a'** in  $DMSO-d_6$ .

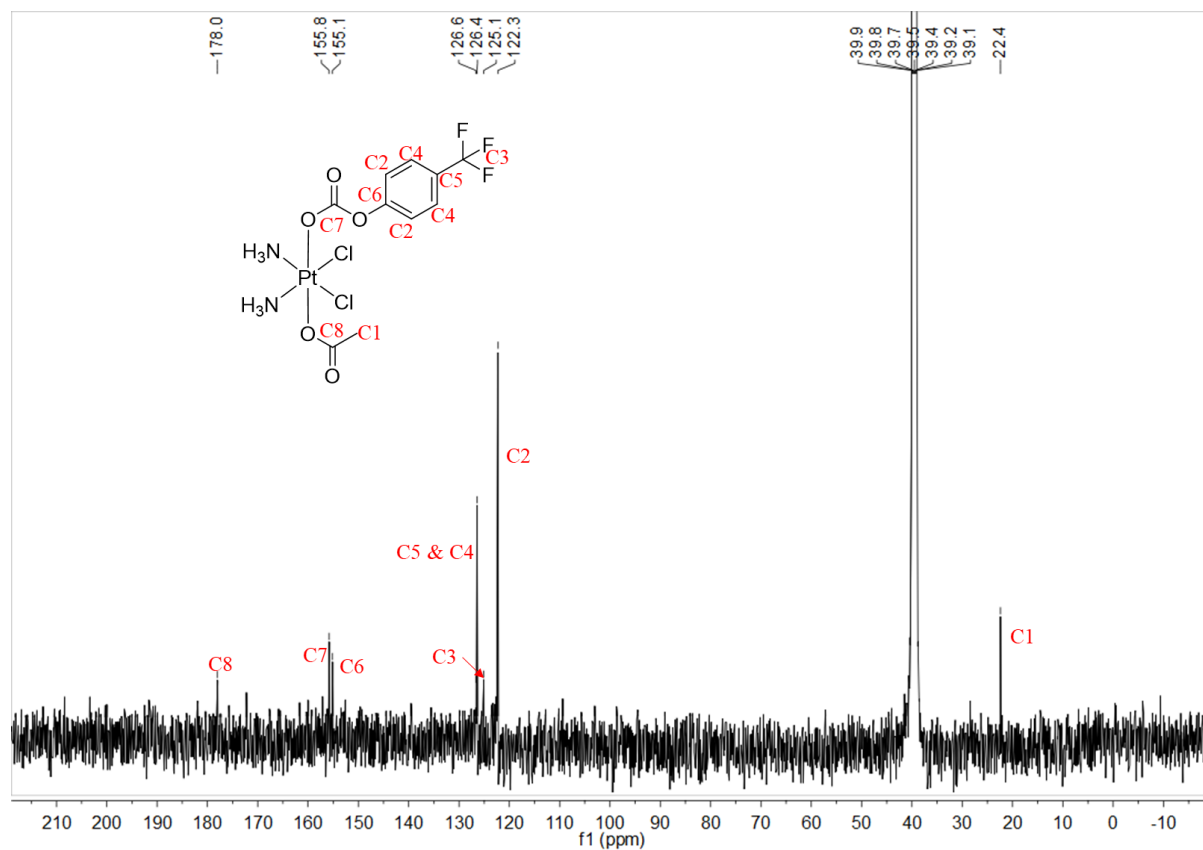

**Figure S43.**  $^{13}\text{C}$  NMR spectrum of complex  $c,t,c$ -[Pt(NH<sub>3</sub>)<sub>2</sub>(OCOOPhCF<sub>3</sub>)(OCOCH<sub>3</sub>)(Cl)<sub>2</sub>] **3a'** in DMSO-*d*<sub>6</sub>.

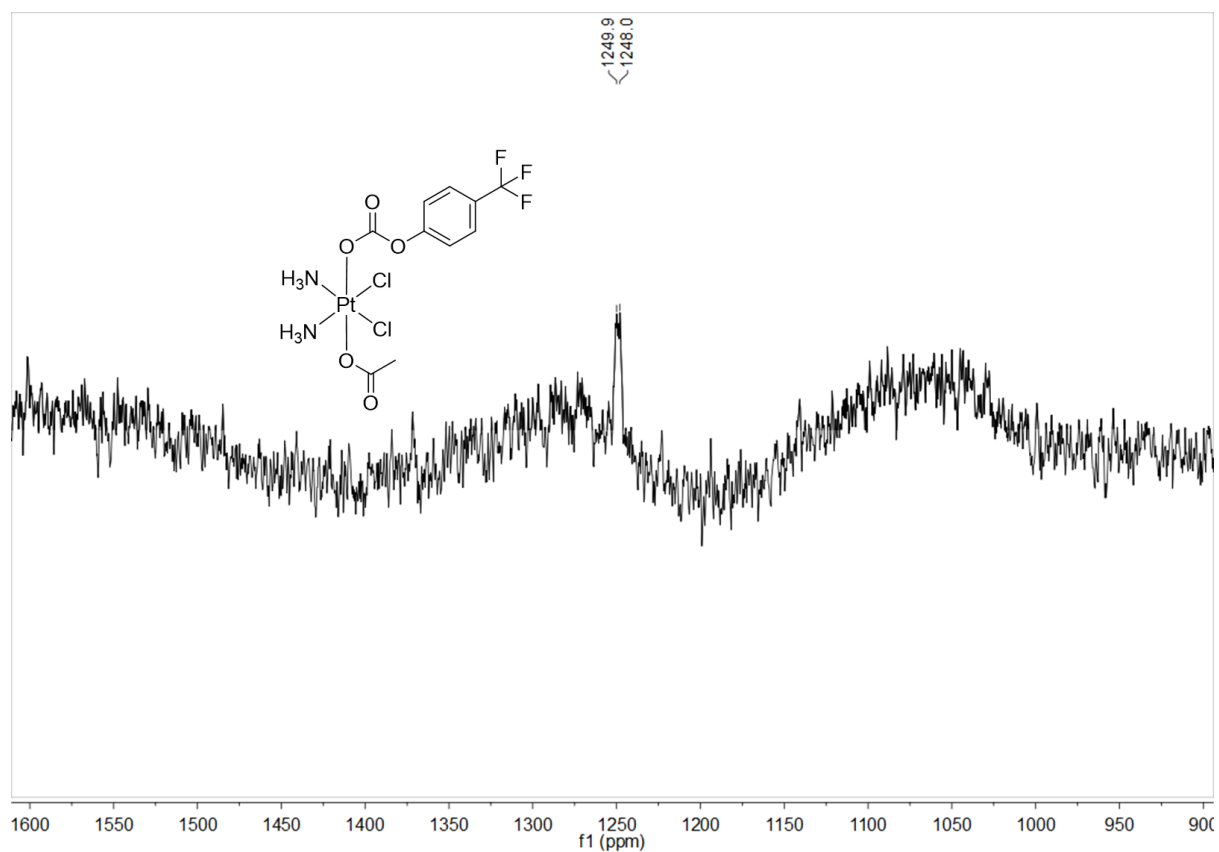

**Figure S44.**  $^{195}\text{Pt}$  NMR spectrum of complex  $c,t,c$ -[Pt(NH<sub>3</sub>)<sub>2</sub>(OCOOPhCF<sub>3</sub>)(OCOCH<sub>3</sub>)(Cl)<sub>2</sub>] **3a'** in DMSO-*d*<sub>6</sub>.

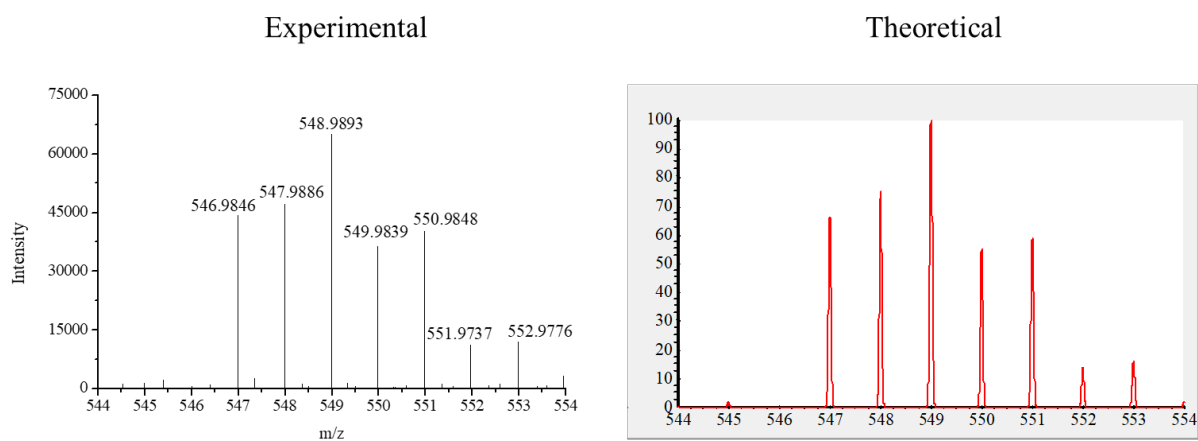

ESI-HRMS (positive ion mode), m/z.  $[M+H]^+$  calculated for  $C_{10}H_{14}Cl_2F_3N_2O_4Pt$ : 548.9909, found: 548.9893

**Figure S45.** ESI-HRMS spectrum of complex *c,t,c*- $[Pt(NH_3)_2(OCOPhCF_3)(OCOCH_3)(Cl)_2]$  **3b'**.

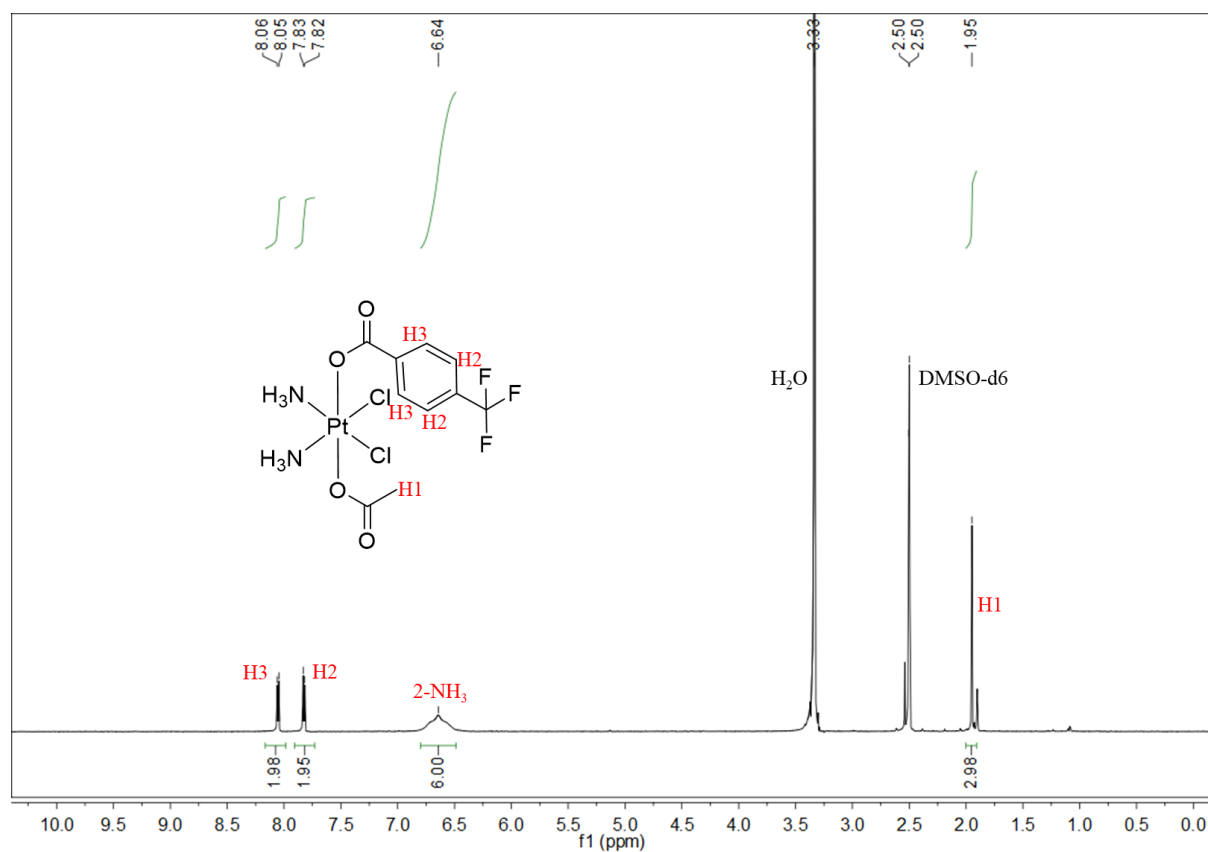

**Figure S46.**  $^1H$  NMR spectrum of complex *c,t,c*- $[Pt(NH_3)_2(OCOPhCF_3)(OCOCH_3)(Cl)_2]$  **3b'** in  $DMSO-d_6$ .

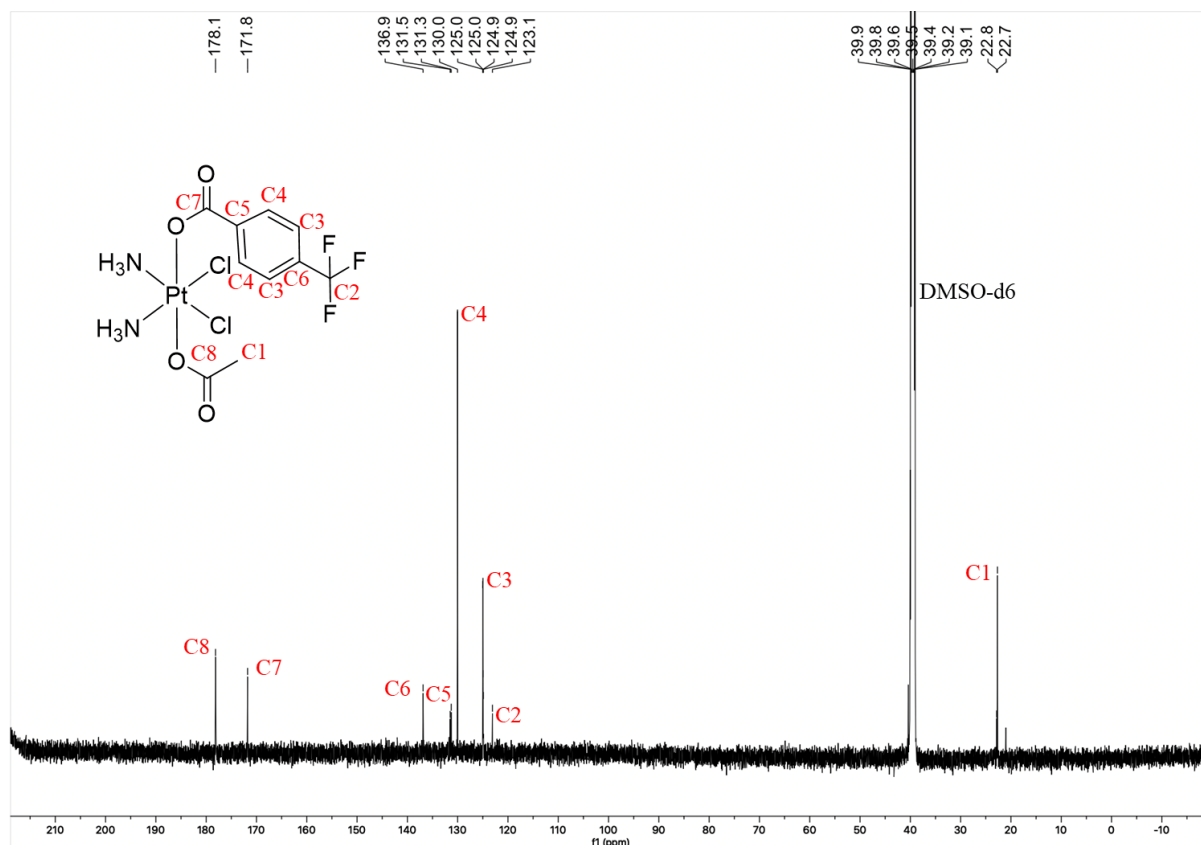

**Figure S47.**  $^{13}\text{C}$  NMR spectrum of complex *c,t,c*-[Pt(NH<sub>3</sub>)<sub>2</sub>(OCOPhCF<sub>3</sub>)(OCOCH<sub>3</sub>)(Cl)<sub>2</sub>] **3b'** in DMSO-*d*<sub>6</sub>.

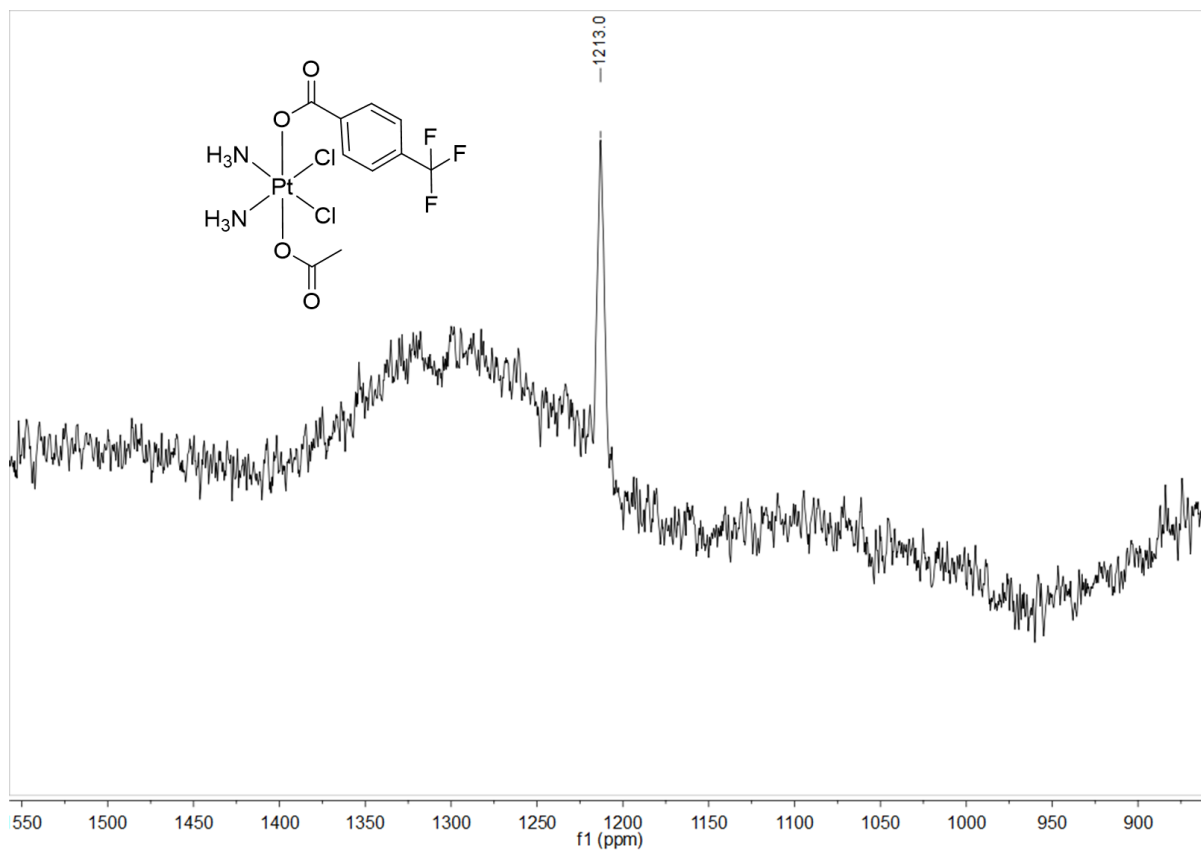

**Figure S48.**  $^{13}\text{C}$  NMR spectrum of complex *c,t,c*-[Pt(NH<sub>3</sub>)<sub>2</sub>(OCOPhCF<sub>3</sub>)(OCOCH<sub>3</sub>)(Cl)<sub>2</sub>] **3b'** in DMSO-*d*<sub>6</sub>.

Complex 1a

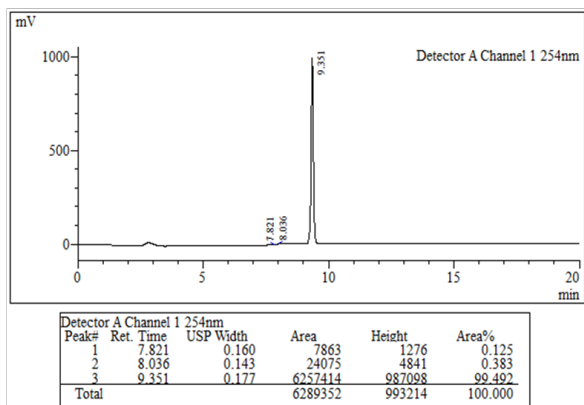

Complex 1b

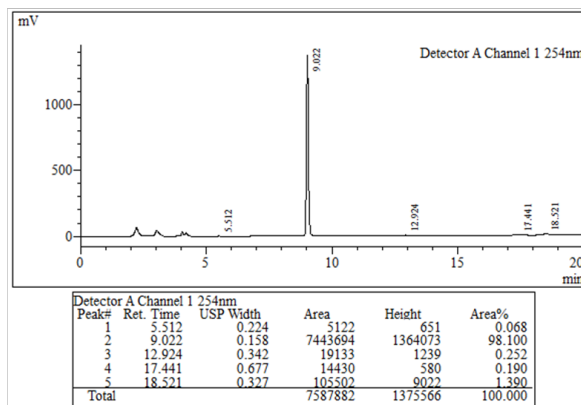

Complex 1a'

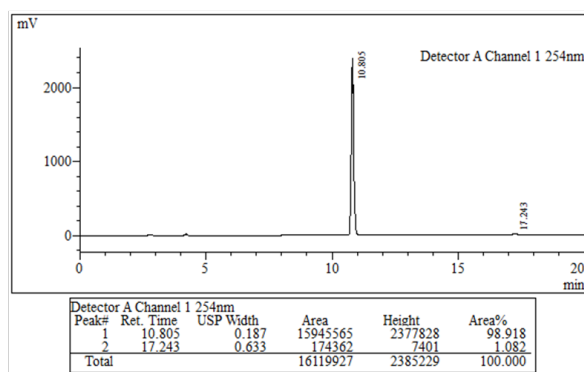

Complex 1b'

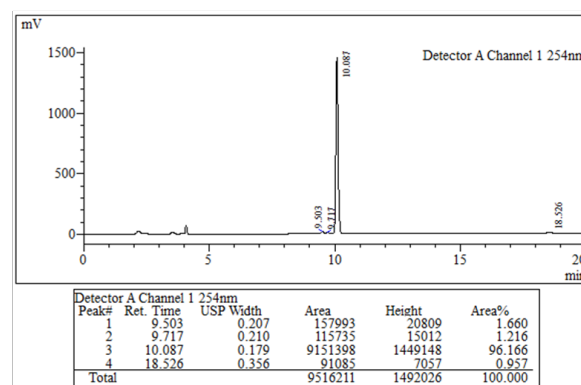

Figure S49. HPLC analysis for the purity of Pt(IV) complexes 1a, 1b, 1a', and 1b'.

Complex 2a

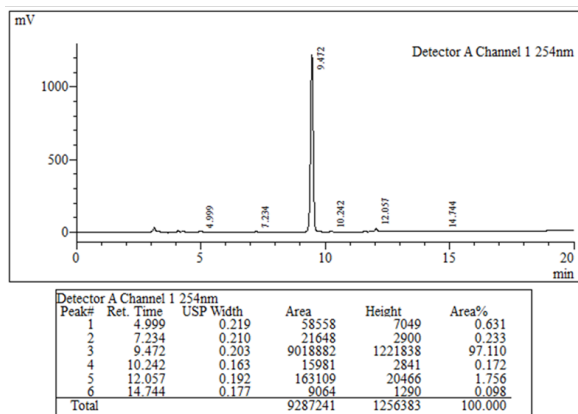

Complex 2b

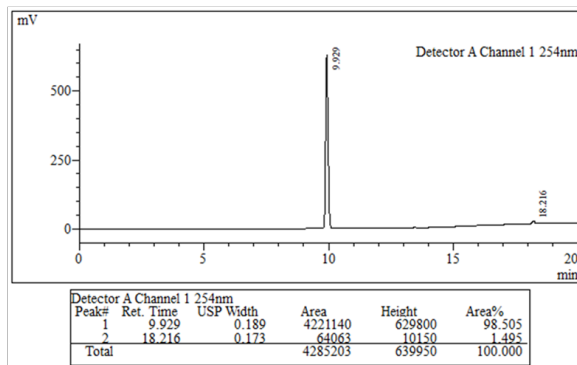

Complex 2a'

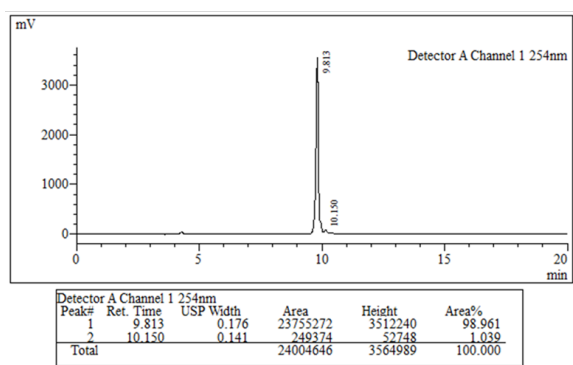

Complex 2b'

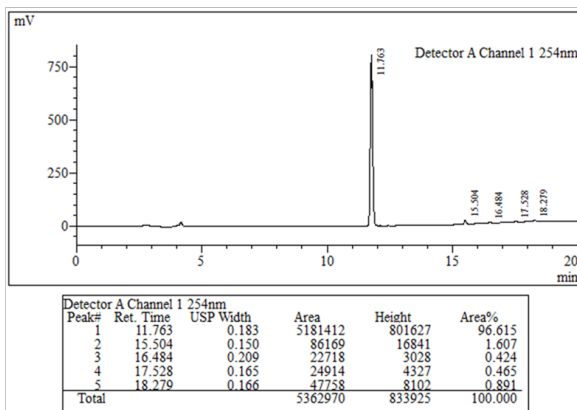

Figure S50. HPLC analysis for the purity of Pt(IV) complexes 2a, 2b, 2a', and 2b'.



Complex 3a

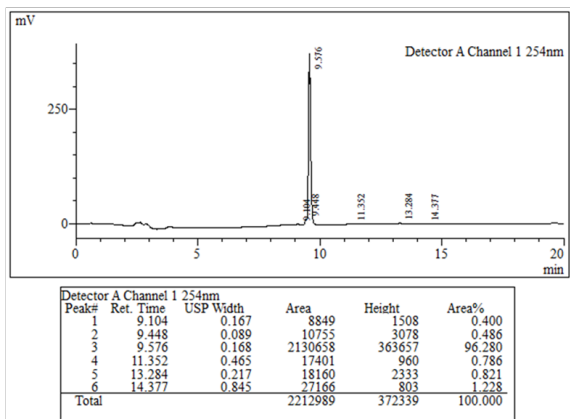

Complex 3b

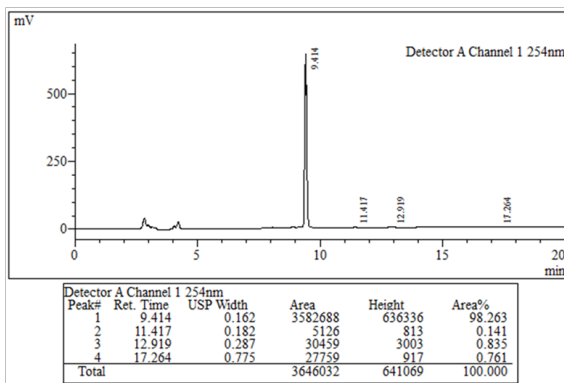

Complex 3a'

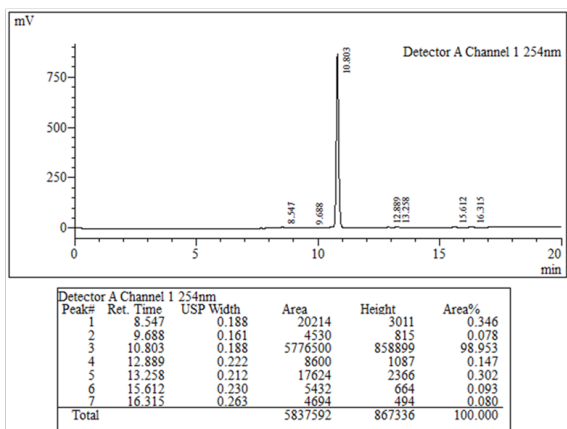

Complex 3b'

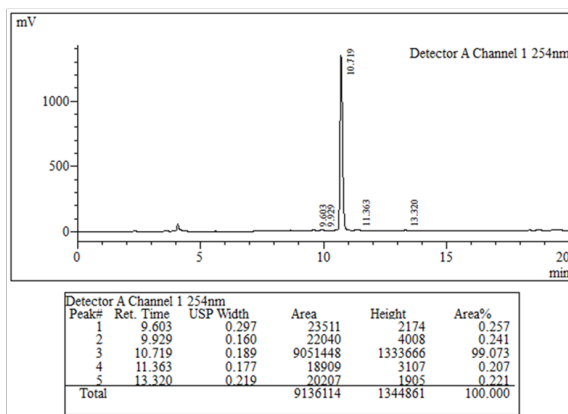

Figure S51. HPLC analysis for the purity of Pt(IV) complexes 3a, 3b, 3a', and 3b'.

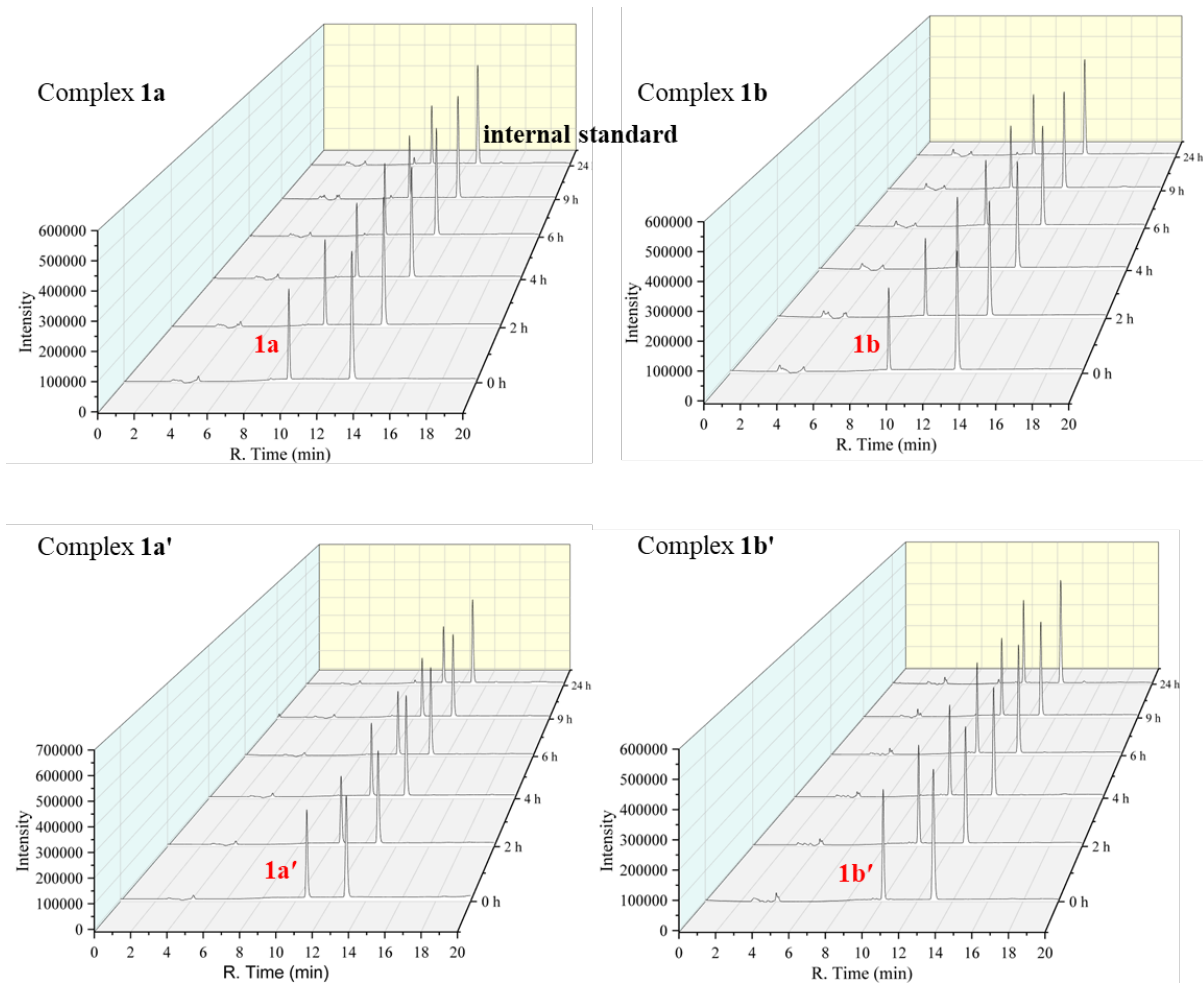

**Figure S52.** HPLC chromatograms of Pt(IV) complexes **1a**, **1b**, **1a'**, and **1b'** in PBS buffer (pH = 7.4) at 37 °C from 0 to 24 h.

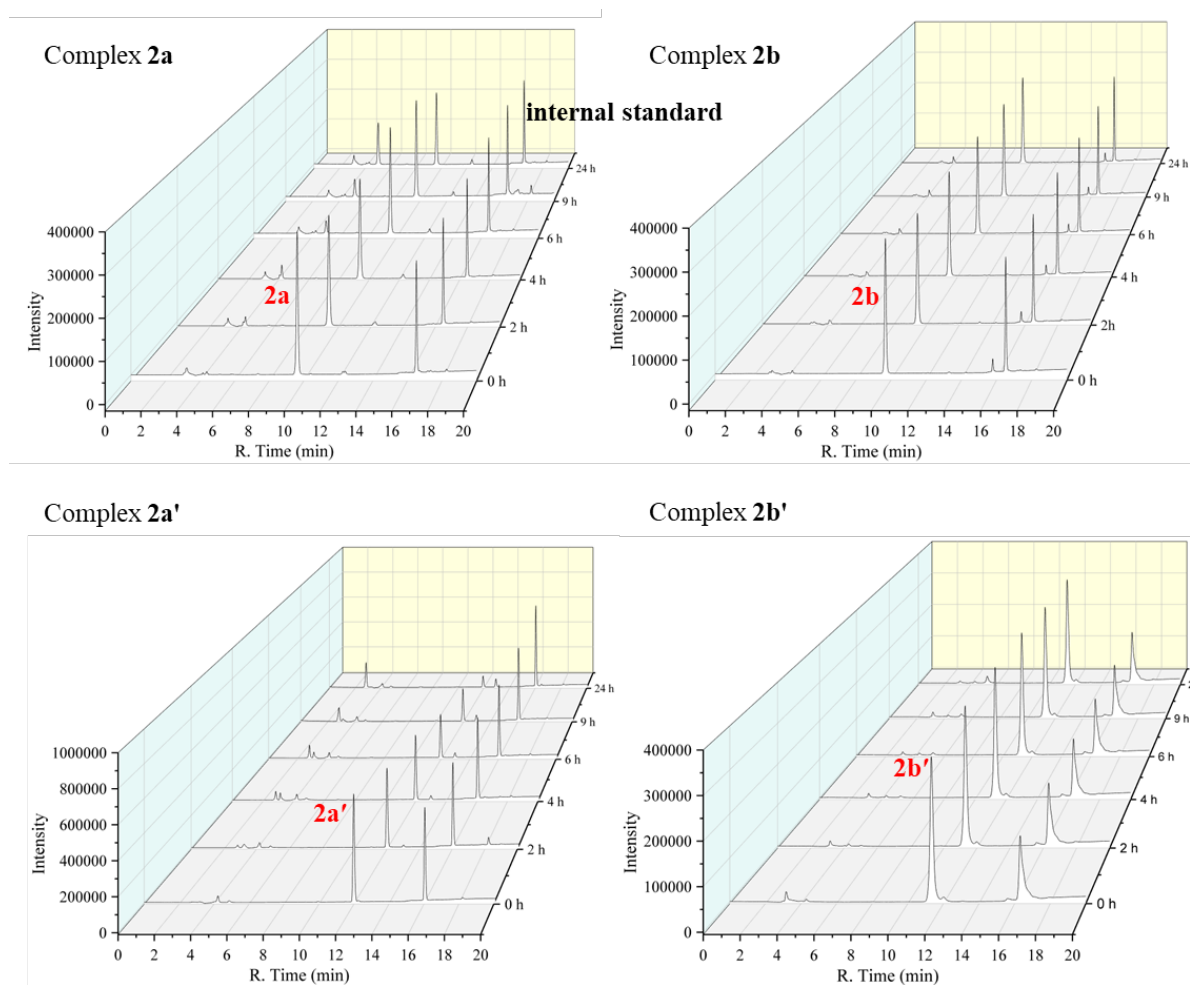

**Figure S53.** HPLC chromatograms of Pt(IV) complexes **2a**, **2b**, **2a'**, and **2b'** in PBS buffer (pH = 7.4) at 37 °C from 0 to 24 h.

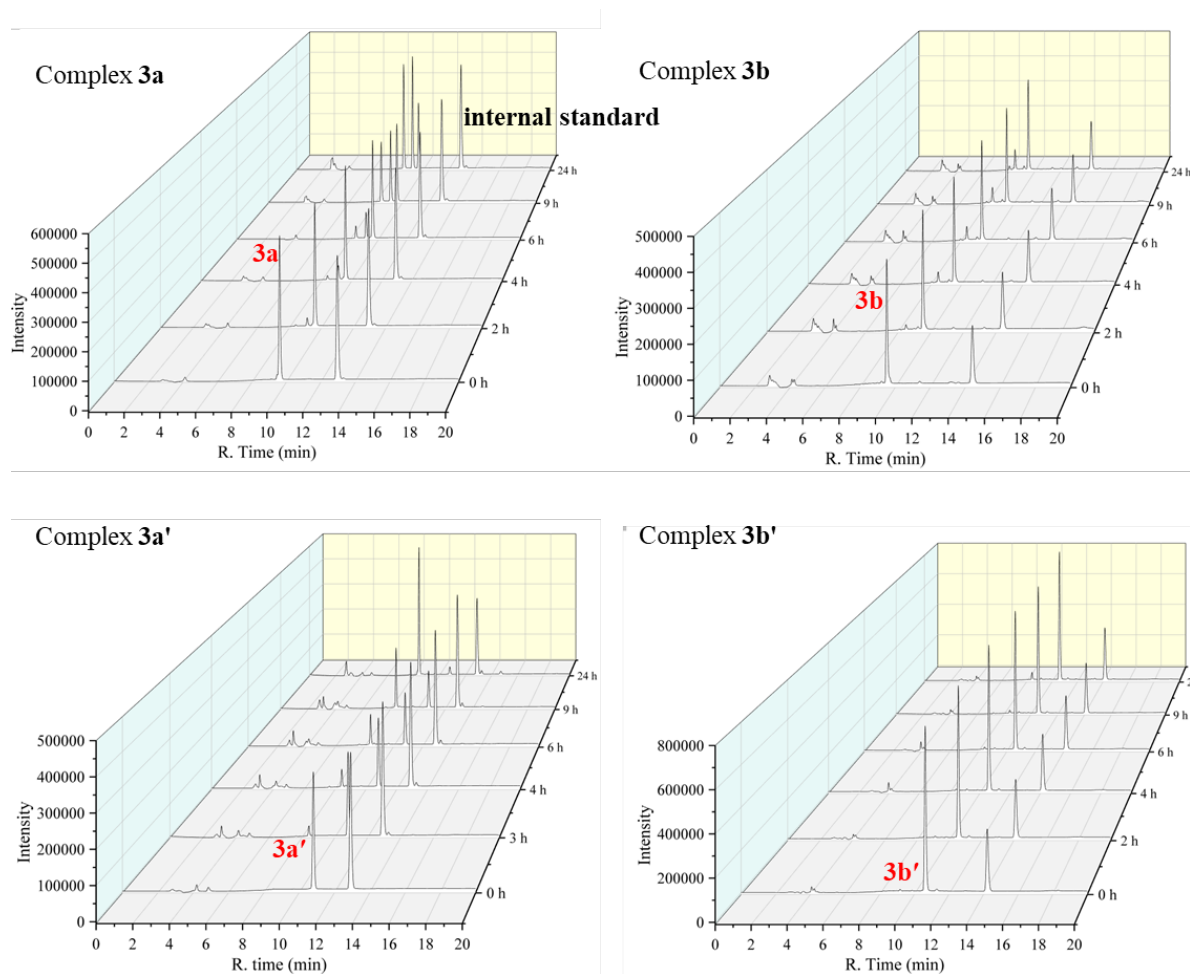

**Figure S54.** HPLC chromatograms of Pt(IV) complexes **3a**, **3b**, **3a'**, and **3b'** in PBS buffer (pH = 7.4) at 37 °C from 0 to 24 h.

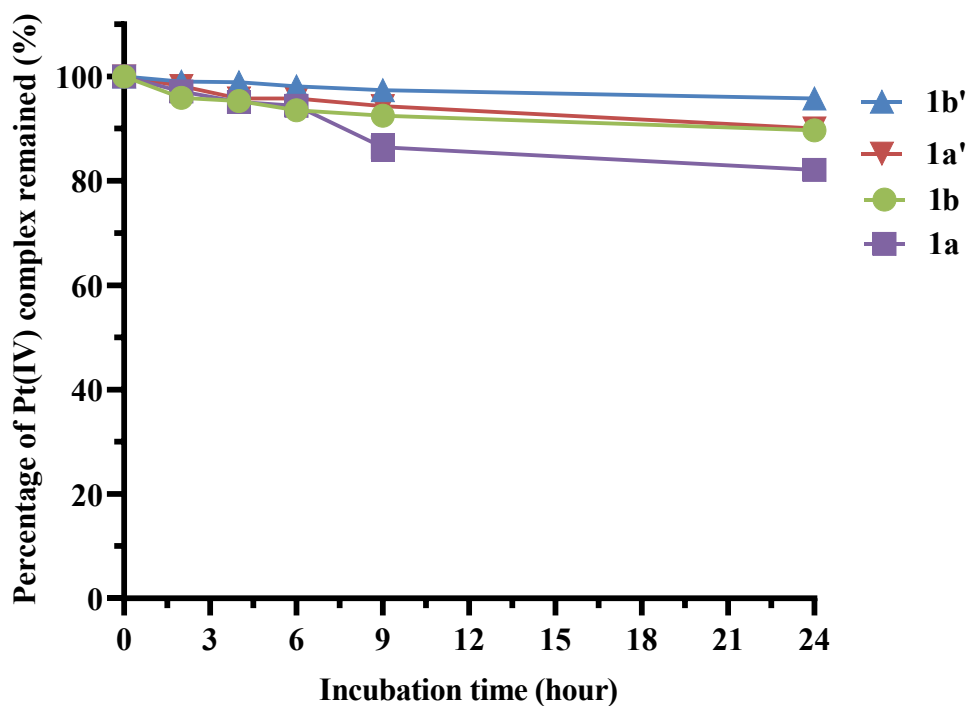

**Figure S55.** The decay profiles of the Pt(IV) complexes **1a**, **1b**, **1a'**, and **1b'** in PBS buffer (pH 7.4) at 37 °C within 24 hours.

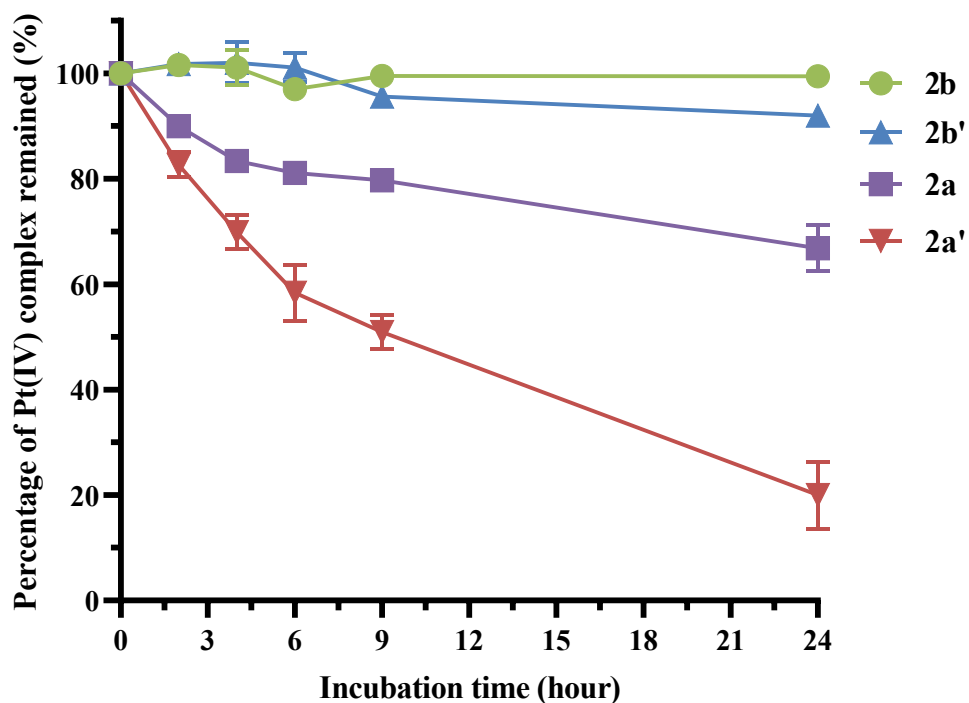

**Figure S56.** The decay profiles of the Pt(IV) complexes **2a**, **2b**, **2a'**, and **2b'** in PBS buffer (pH 7.4) at 37 °C within 24 hours.

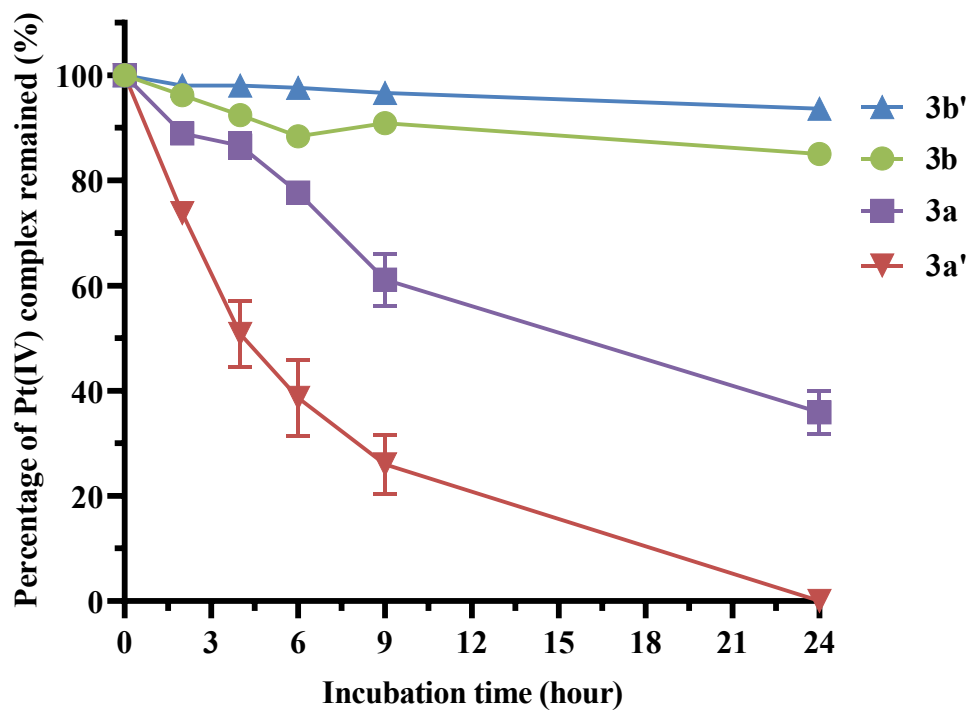

**Figure S57.** The decay profiles of the Pt(IV) complexes **3a**, **3b**, **3a'**, and **3b'** in PBS buffer (pH 7.4) at 37 °C within 24 hours.

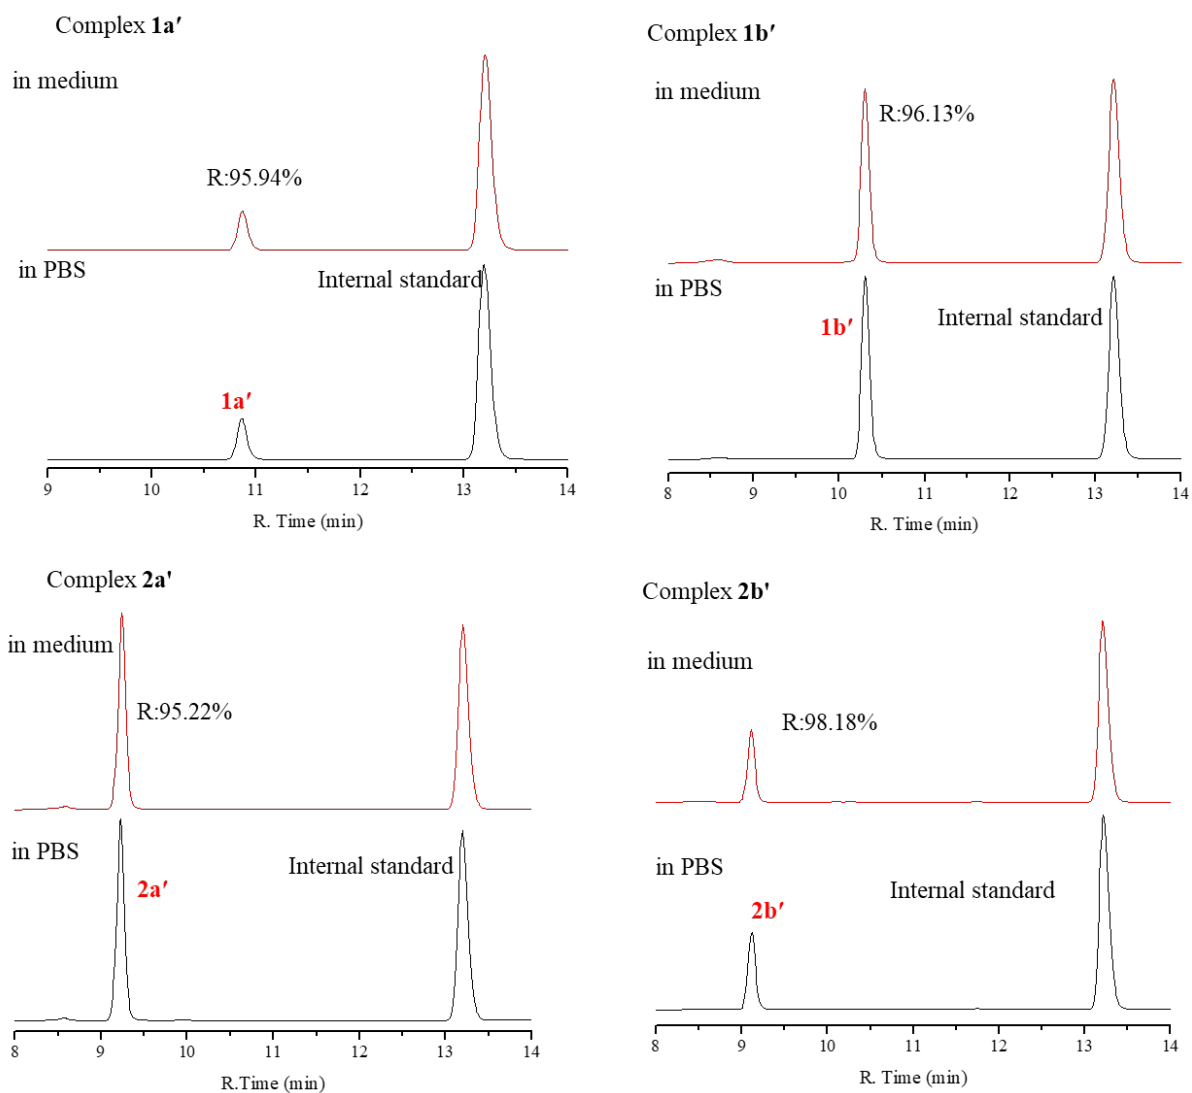

**Figure S58.** HPLC chromatograms of Pt(IV) complexes **1a'**, **1b'**, **2a'**, and **2b'** in medium and PBS. The recovery rate (R) of complex was obtained by using the following equation:  $R = (A_{\text{Pt(IV) in medium}}/A_{\text{internal standard in medium}})/(A_{\text{Pt(IV) in PBS}}/A_{\text{internal standard in PBS}})$ , where  $A_{\text{Pt(IV) in medium}}$ , and  $A_{\text{Pt(IV) in PBS}}$  are the integrated areas of HPLC peaks of Pt(IV) complexes recovered from medium and in PBS at a wavelength of 254 nm, respectively;  $A_{\text{internal standard in medium}}$ , and  $A_{\text{internal standard in PBS}}$  are the integrated area of HPLC peaks of internal standard obtained in medium and PBS at a wavelength of 254 nm, respectively.

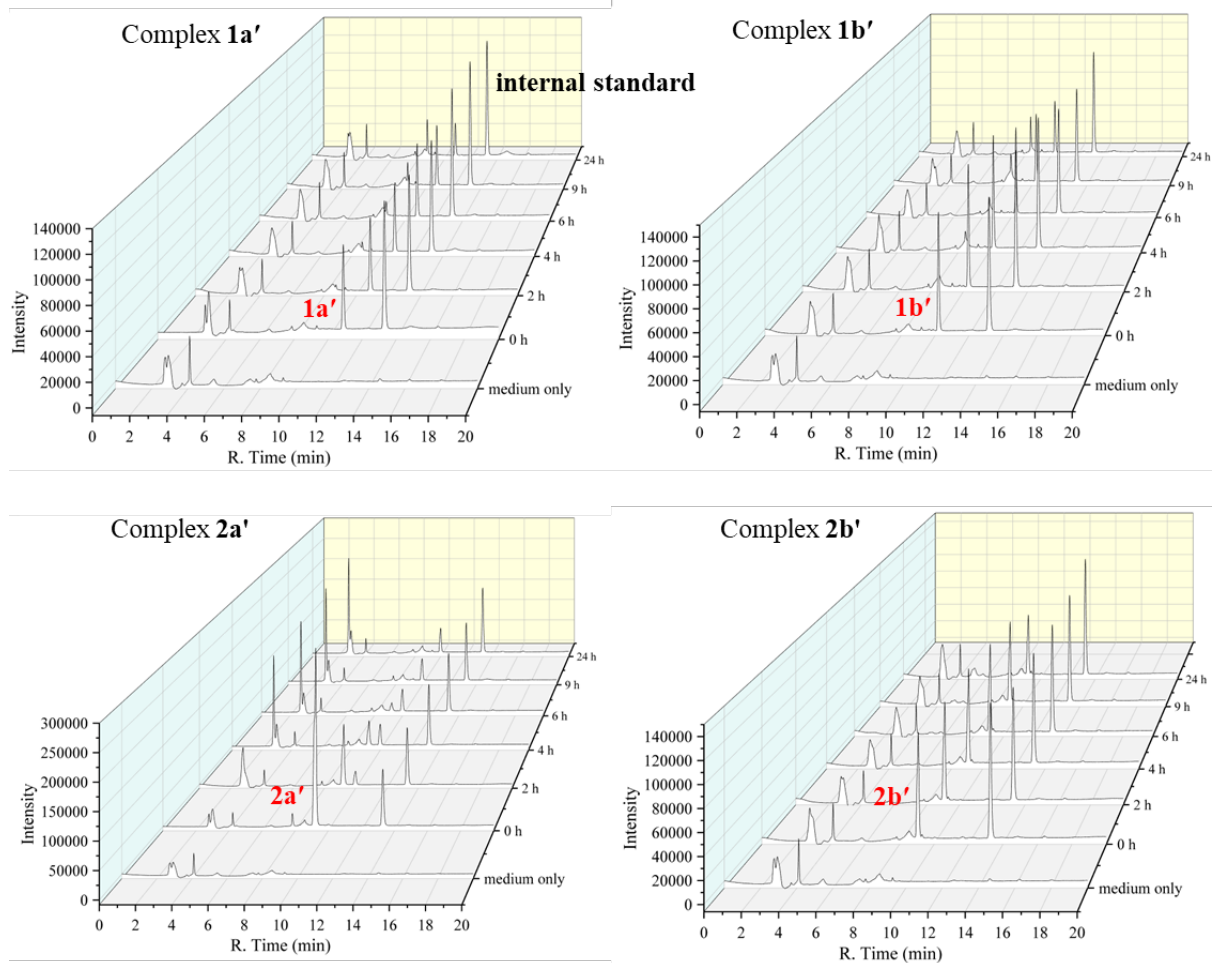

**Figure S59.** HPLC chromatograms of Pt(IV) complexes **1a'**, **1b'**, **2a'**, and **2b'** in complete medium at 37 °C from 0 to 24 h.



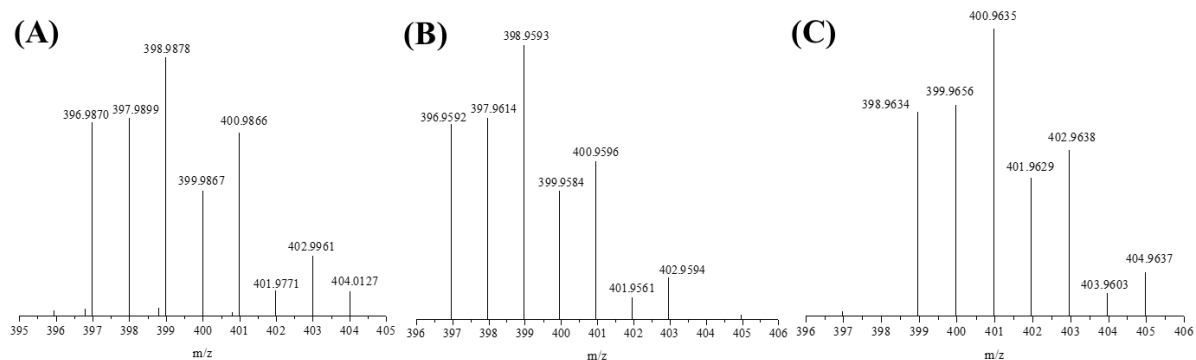

**(D) Proposed hydrolysis pathway of **3a'****

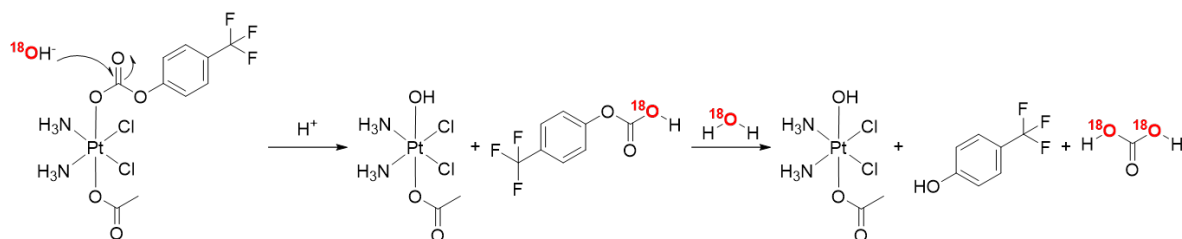

**Figure S60.** (A) HRMS spectrum of  $c,t,c$ -[Pt(NH<sub>3</sub>)<sub>2</sub>(OCOOPhCF<sub>3</sub>)(OCOCH<sub>3</sub>)(Cl)<sub>2</sub>] **3a'** in PBS-buffered H<sub>2</sub><sup>18</sup>O after 24 h, confirming that only  $\{c,t,c$ -[Pt(NH<sub>3</sub>)<sub>2</sub>(<sup>16</sup>OH)(OCOCH<sub>3</sub>)(Cl)<sub>2</sub>] + Na<sup>+</sup> was formed; (B) Simulated ESI-MS spectrum of  $\{c,t,c$ -[Pt(NH<sub>3</sub>)<sub>2</sub>(<sup>16</sup>OH)(OCOCH<sub>3</sub>)(Cl)<sub>2</sub>] + Na<sup>+</sup>; (C) simulated ESI-MS spectrum of  $\{c,t,c$ -[Pt(NH<sub>3</sub>)<sub>2</sub>(<sup>18</sup>OH)(OCOCH<sub>3</sub>)(Cl)<sub>2</sub>] + Na<sup>+</sup>; (D) the possible hydrolytic pathway of **3a'**: an attack of the <sup>18</sup>OH<sup>-</sup> on the carbonyl carbon, leading to the formation of Pt-<sup>16</sup>OH.

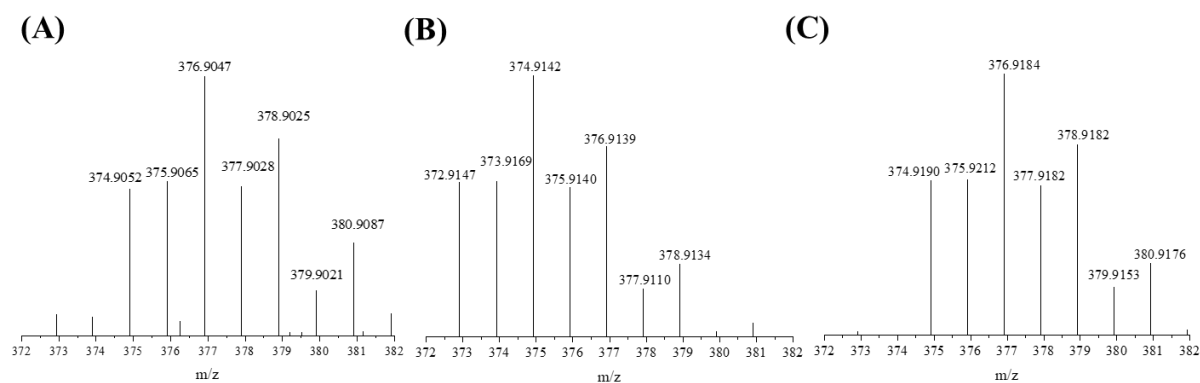

**(D) Proposed hydrolysis pathway of  $c,t,c$ -[Pt(NH<sub>3</sub>)<sub>2</sub>(acetato)Cl(Cl)<sub>2</sub>]**

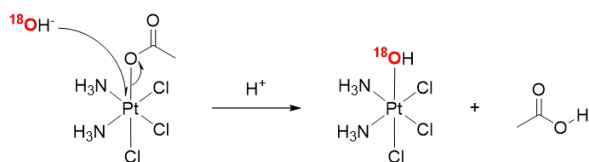

**Figure S61.** (A) HRMS spectrum of  $c,t,c$ -[Pt(NH<sub>3</sub>)<sub>2</sub>(OCOCH<sub>3</sub>)Cl(Cl)<sub>2</sub>] in PBS-buffered H<sub>2</sub><sup>18</sup>O after 24 h, confirming that only  $\{c,t,c$ -[Pt(NH<sub>3</sub>)<sub>2</sub>(<sup>18</sup>OH)Cl(Cl)<sub>2</sub>] + Na<sup>+</sup> was formed; (B) simulated ESI-MS spectrum of  $\{c,t,c$ -[Pt(NH<sub>3</sub>)<sub>2</sub>(<sup>16</sup>OH)Cl(Cl)<sub>2</sub>] + Na<sup>+</sup>; (C) simulated ESI-MS spectrum of  $\{c,t,c$ -[Pt(NH<sub>3</sub>)<sub>2</sub>(<sup>18</sup>OH)Cl(Cl)<sub>2</sub>] + Na<sup>+</sup>; (D) the possible hydrolytic pathway of  $c,t,c$ -[Pt(NH<sub>3</sub>)<sub>2</sub>(OCOCH<sub>3</sub>)Cl(Cl)<sub>2</sub>]: a direct attack from <sup>18</sup>OH<sup>-</sup> to the centre of Pt(IV) complex, resulting in the break of Pt(IV)-O(COCH<sub>3</sub>) bond and formation of the Pt-<sup>18</sup>OH bond.

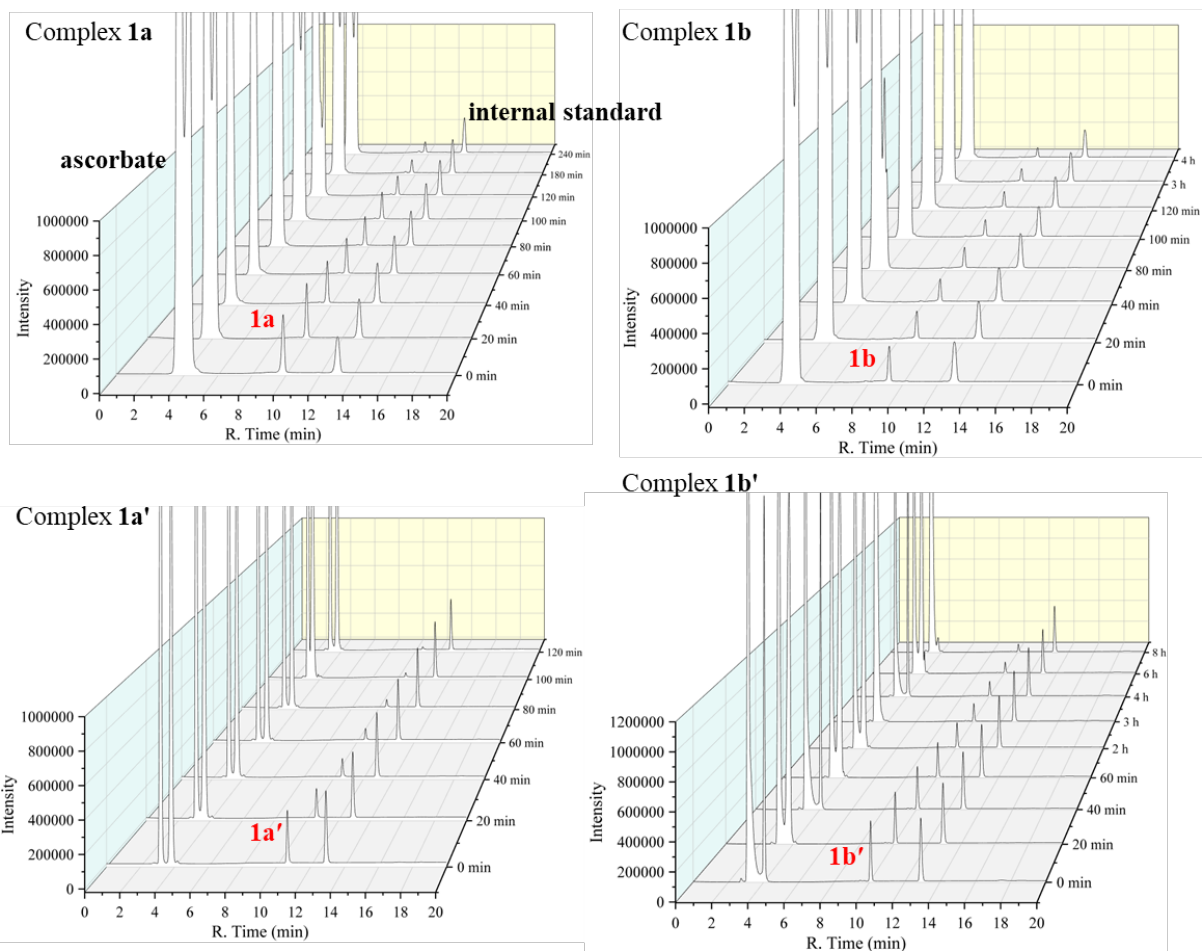

**Figure S62.** HPLC chromatograms for the reduction test of Pt(IV) complexes **1a**, **1b**, **1a'**, and **1b'** in a PBS buffer (pH = 7.4) containing 20 equiv. ascorbate.

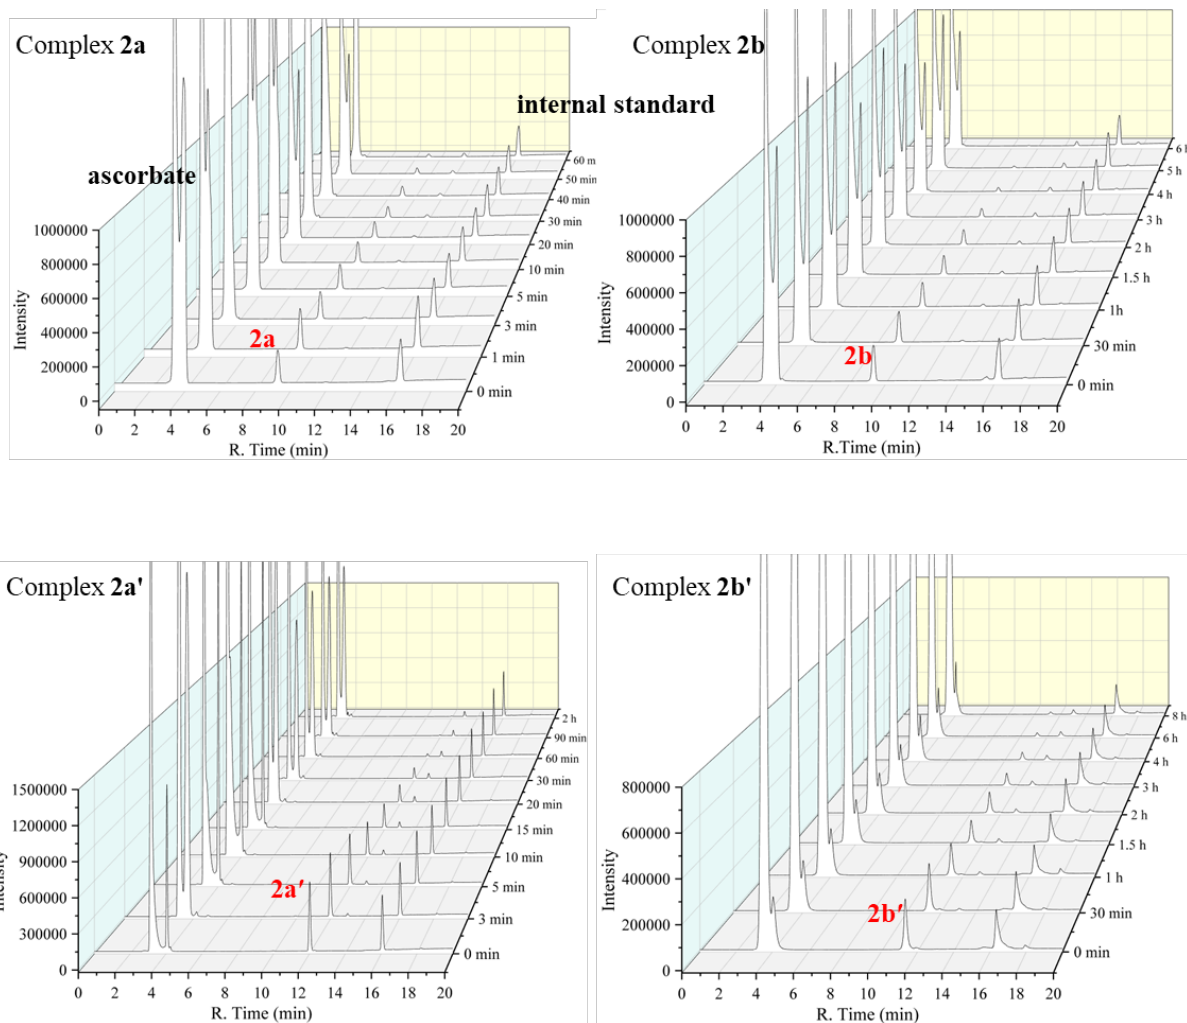

**Figure S63.** HPLC chromatograms for the reduction test of Pt(IV) complexes **2a**, **2b**, **2a'** and **2b'** in a PBS buffer (pH = 7.4) containing 20 equiv. ascorbate.

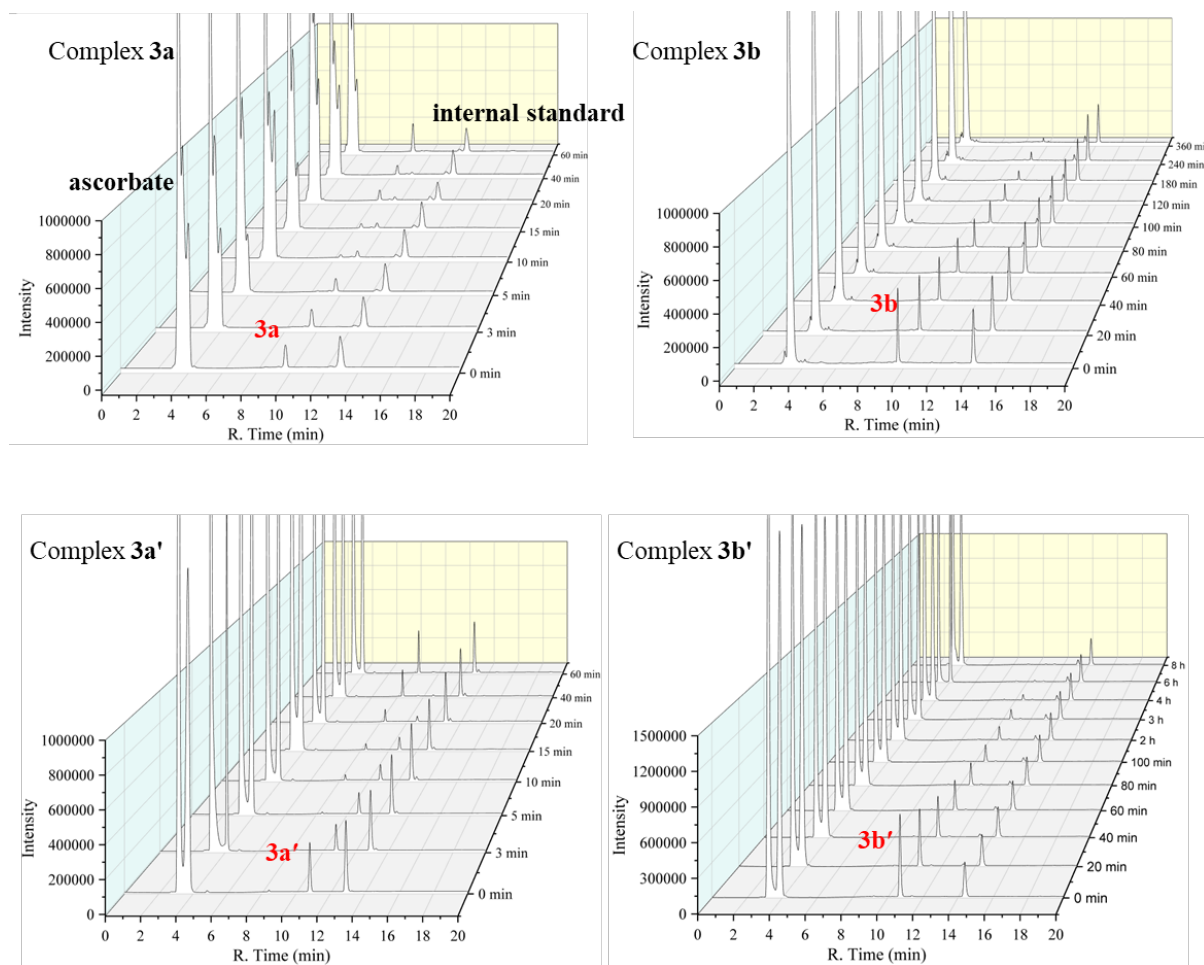

**Figure S64.** HPLC chromatograms for the reduction test of Pt(IV) complexes **3a**, **3b**, **3a'** and **3b'** in a PBS buffer (pH = 7.4) containing 20 equiv. ascorbate.

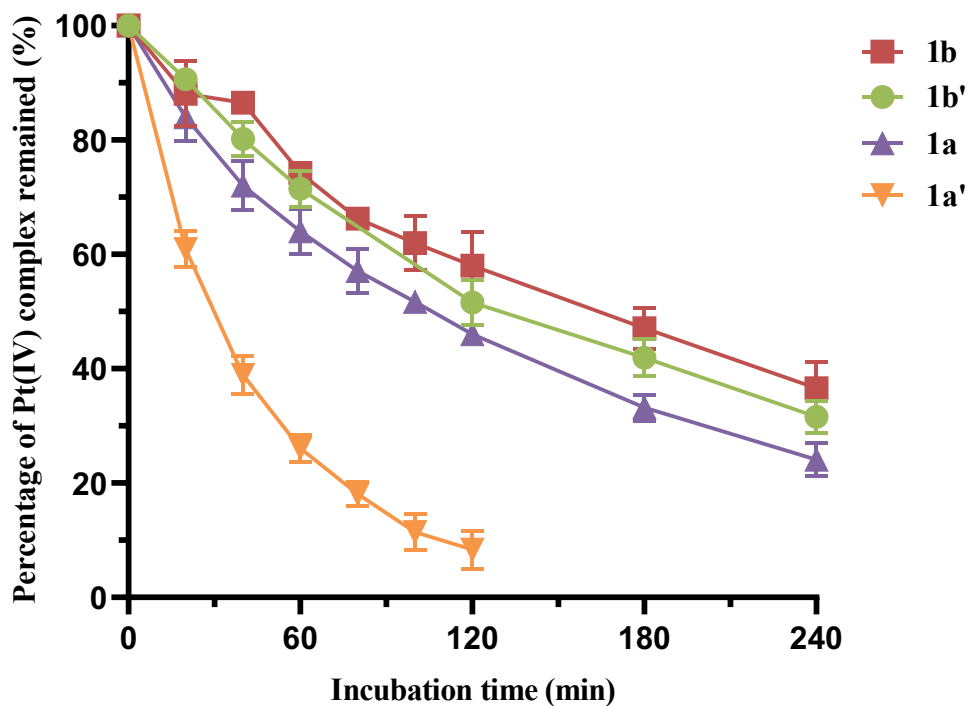

**Figure S65.** The decay profiles of the Pt(IV) complexes **1a**, **1b**, **1a'**, and **1b'** in PBS buffer (pH 7.4) at 37 °C with excess amount of sodium ascorbate.

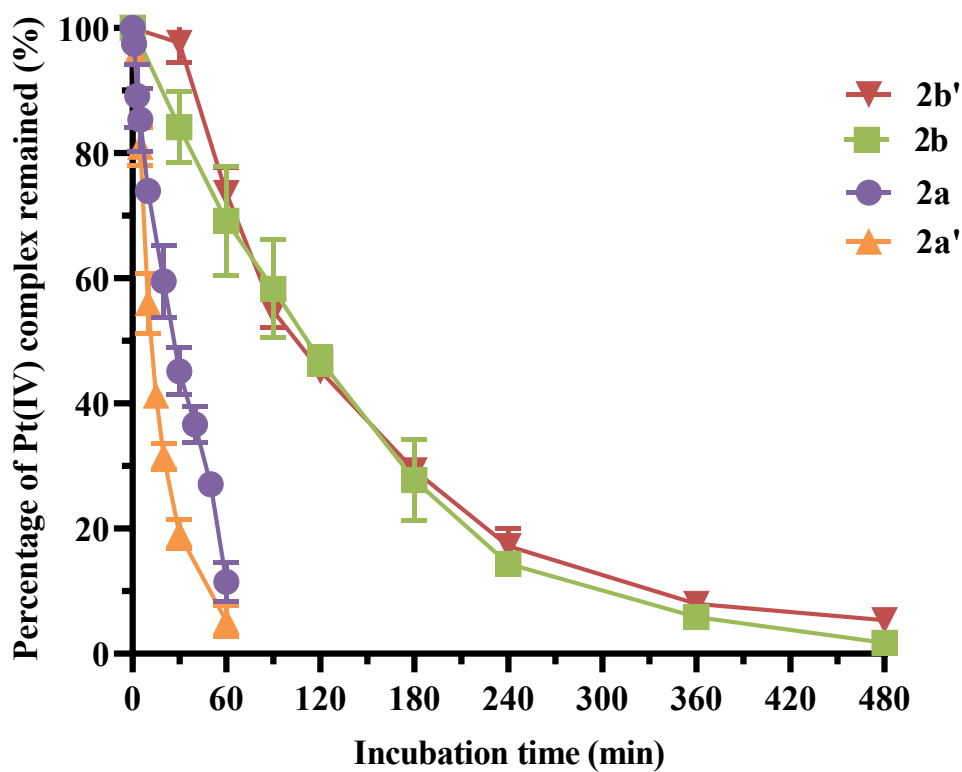

**Figure S66.** The decay profiles of the Pt(IV) complexes **2a**, **2b**, **2a'**, and **2b'** in PBS buffer (pH 7.4) at 37 °C with excess amount of sodium ascorbate.

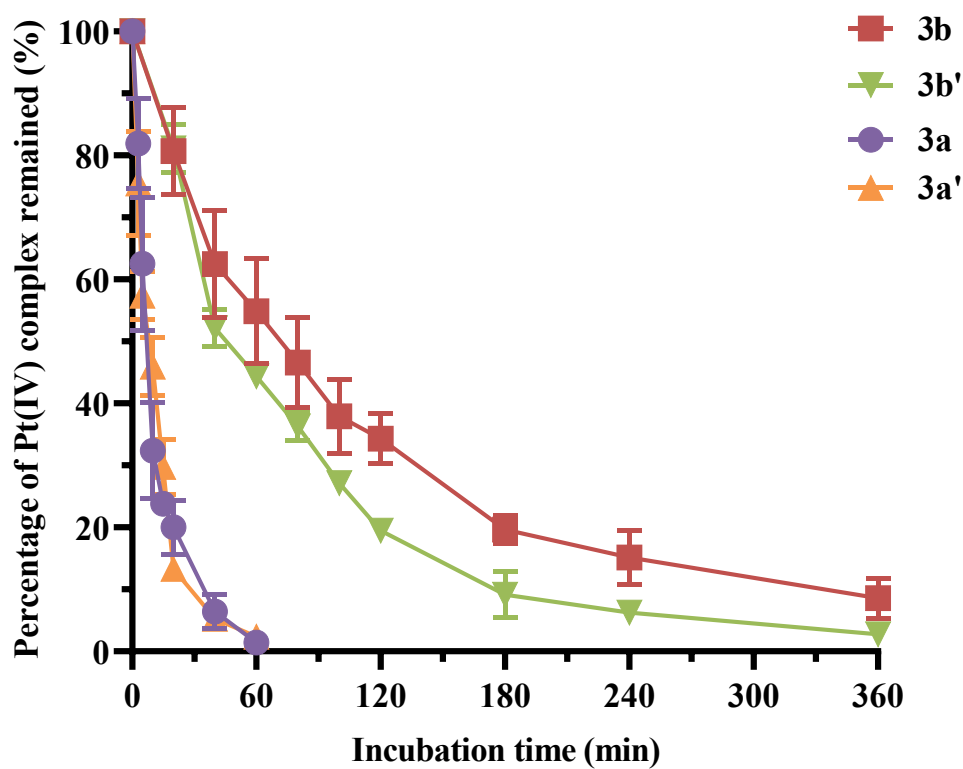

**Figure S67.** The decay profiles of the Pt(IV) complexes **3a**, **3b**, **3a'**, and **3b'** in PBS buffer (pH 7.4) at 37 °C with excess amount of sodium ascorbate.

Complex 1a

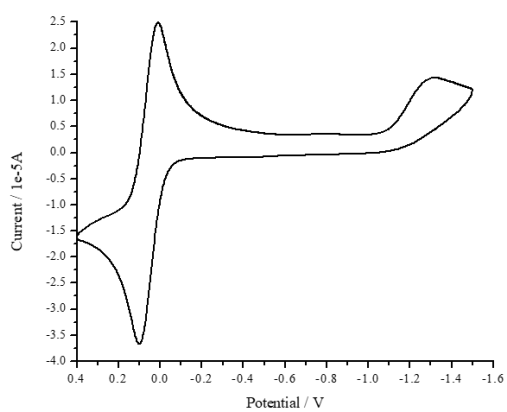

Complex 1b

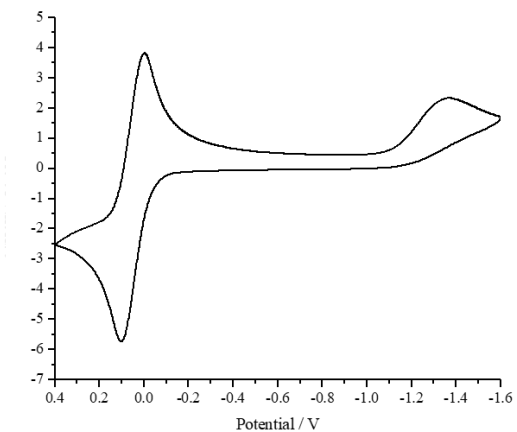

Complex 1a'

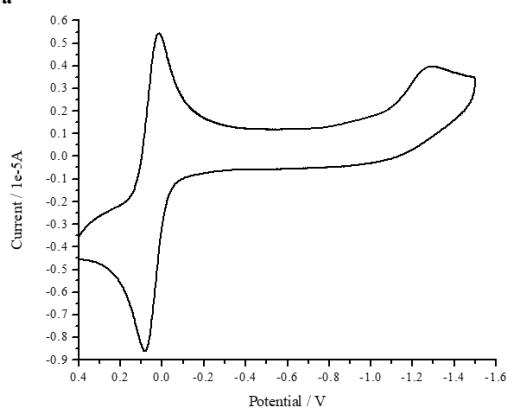

Complex 1b'

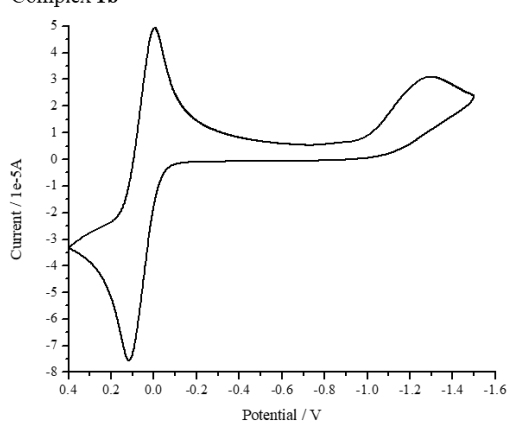

**Figure S68.** Cyclic voltammograms of complexes **1a**, **1b**, **1a'**, and **1b'** with ferrocene as internal reference.

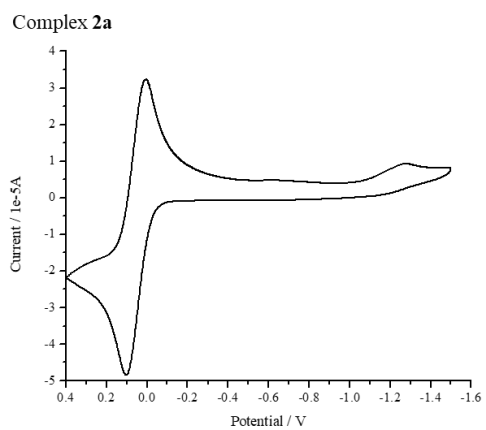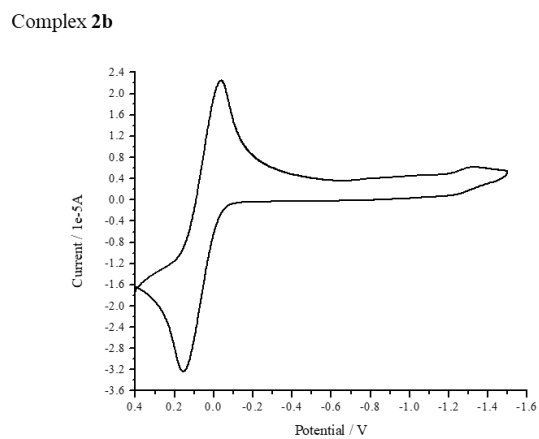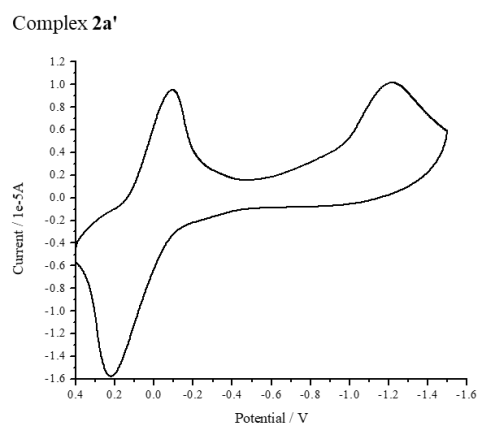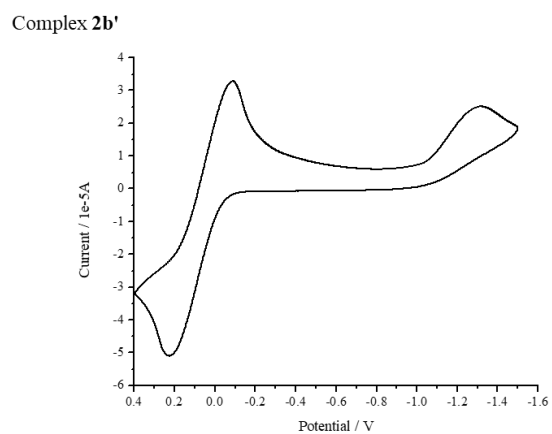

**Figure S69.** Cyclic voltammograms of complexes **2a**, **2b**, **2a'**, and **2b'** with ferrocene as internal reference.



Complex 3a

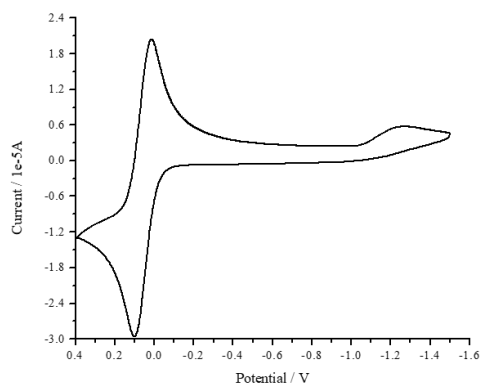

Complex 3b

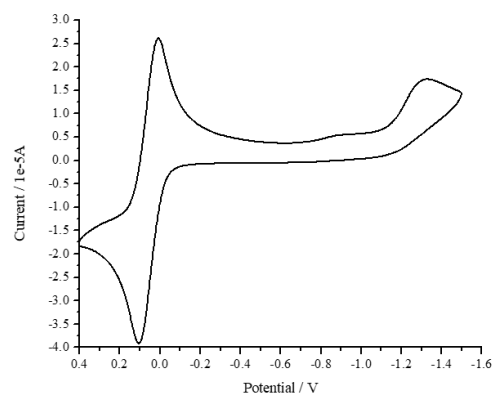

Complex 3a'

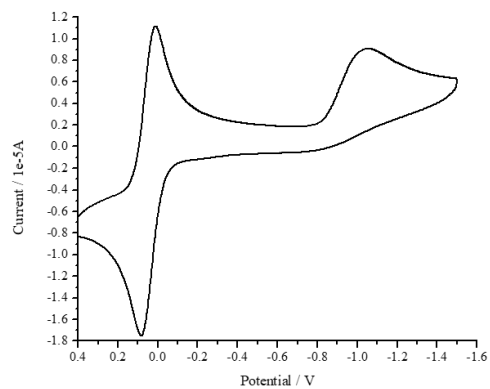

Complex 3b'

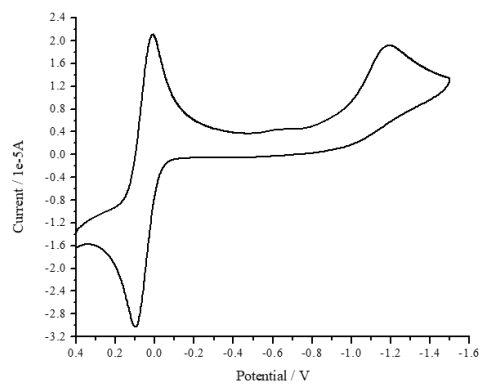

**Figure S70.** Cyclic voltammograms of complexes **3a**, **3b**, **3a'**, and **3b'** with ferrocene as internal reference.

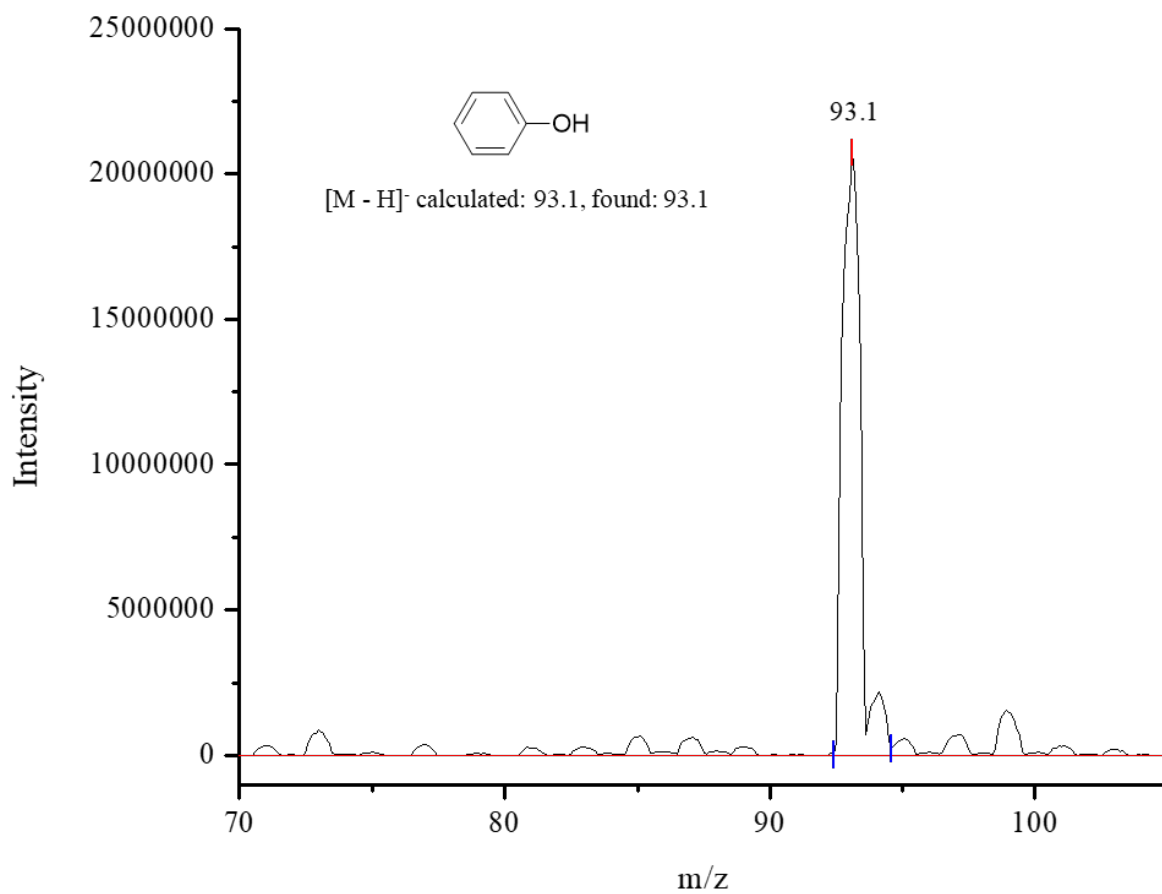

**Figure S71.** ESI-mass spectrum of the reduction products of **2a'** (negative ion mode).

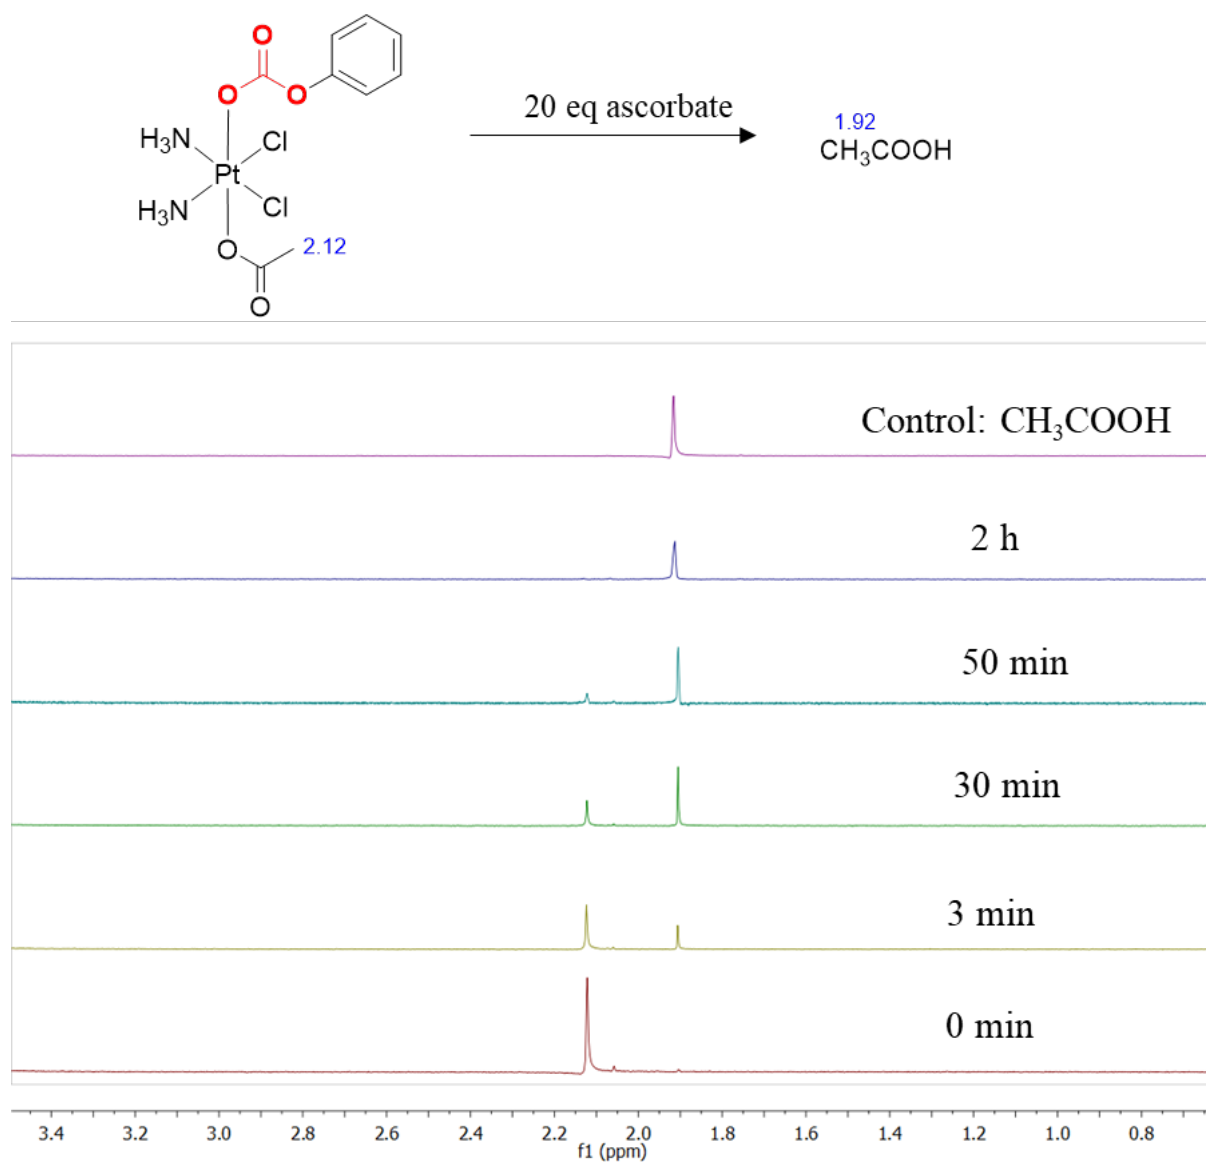

**Figure S72.** <sup>1</sup>H NMR spectra of the reduction of **2a'** with 20 equiv. of ascorbate.

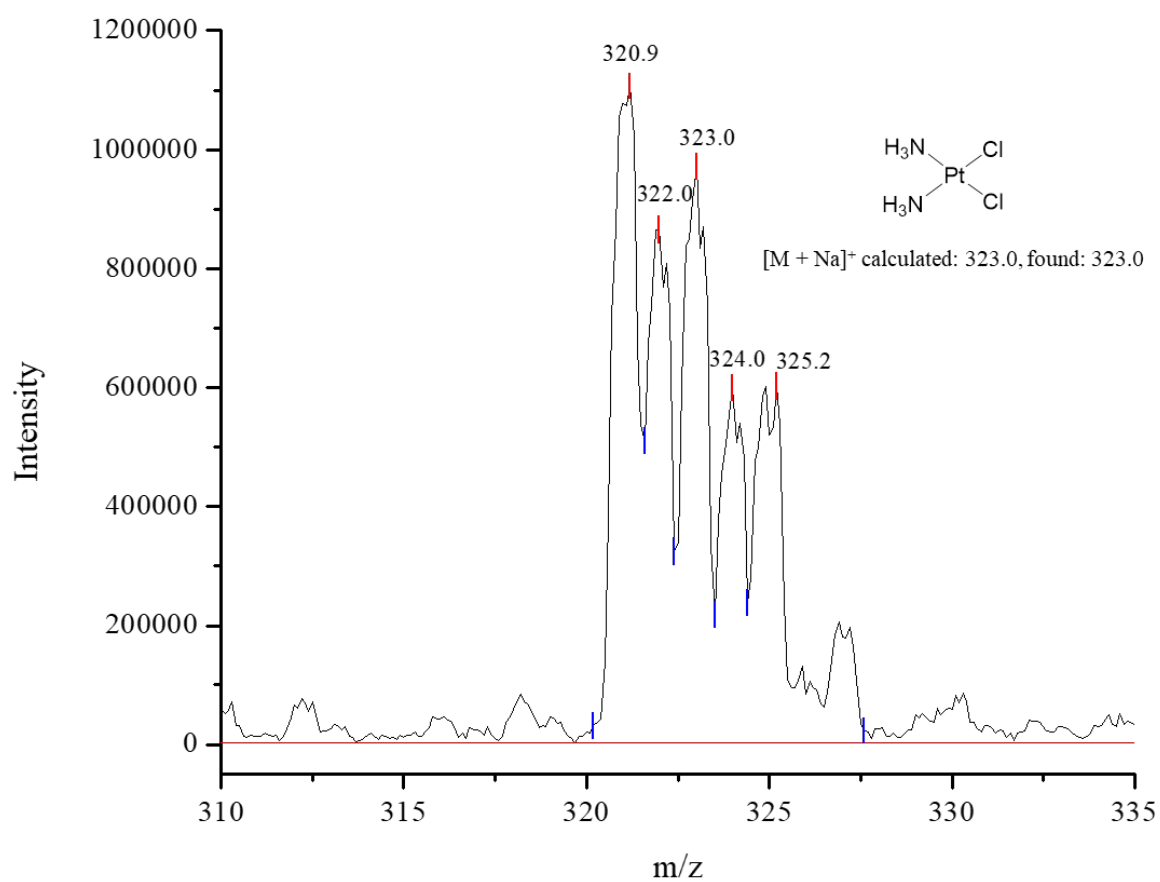

**Figure S73.** ESI-mass spectrum of the reduction product of **2a'** (positive ion mode).

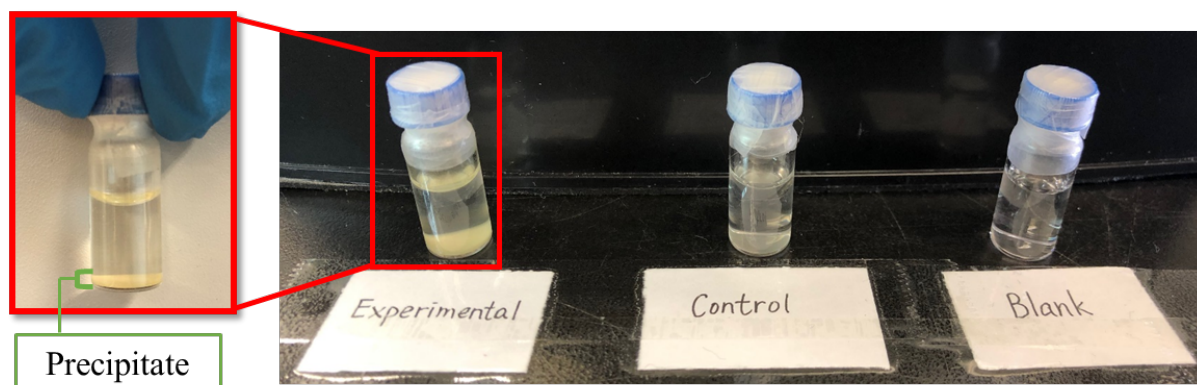

**Figure S74.** Detection of the presence of CO<sub>2</sub> with limewater. Experimental group: carbonate complex **2a'** (1 mM) in Milli-Q water containing 20 mM ascorbate was incubated with saturated limewater; control group: a solution containing everything but Pt(IV) complex was introduced as a control; blank: a solution containing the limewater only.

**Table S1.**  $^{195}\text{Pt}$  NMR and selected  $^1\text{H}$ ,  $^{13}\text{C}$  NMR chemical shifts of the carbonated and carboxylated Pt(IV) complexes in DMSO- $d_6$  (values in ppm).

| Complex    | $\text{R}_1^a$   | $\text{R}_2^a$                          | $\delta^1\text{H}, -\text{NH}_3$ | $\delta^{13}\text{C}, -\text{OCO-R}$ | $\delta^{195}\text{Pt}$ |
|------------|------------------|-----------------------------------------|----------------------------------|--------------------------------------|-------------------------|
| <b>1a</b>  | OH               | $\text{OCOO}(\text{CH}_2)_5\text{CH}_3$ | 6.04 – 5.82                      | 160.3                                | 1069.7                  |
| <b>1b</b>  | OH               | $\text{OCO}(\text{CH}_2)_5\text{CH}_3$  | 6.05 – 5.88                      | 181.2                                | 1051.6                  |
| <b>1a'</b> | $\text{OCOCH}_3$ | $\text{OCOO}(\text{CH}_2)_5\text{CH}_3$ | 6.53                             | 159.7                                | 1242.1                  |
| <b>1b'</b> | $\text{OCOCH}_3$ | $\text{OCO}(\text{CH}_2)_5\text{CH}_3$  | 6.58 – 6.46                      | 180.9                                | 1232.8                  |
| <b>2a</b>  | OH               | $\text{OCOPh}$                          | 6.14 – 5.81                      | 157.4                                | 1070.1                  |
| <b>2b</b>  | OH               | $\text{OCOPh}$                          | 6.27 – 5.85                      | 173.5                                | 1038.4                  |
| <b>2a'</b> | $\text{OCOCH}_3$ | $\text{OCOPh}$                          | 6.57                             | 157.0                                | 1248.5                  |
| <b>2b'</b> | $\text{OCOCH}_3$ | $\text{OCOPh}$                          | 6.65                             | 173.3                                | 1214.8                  |
| <b>3a</b>  | OH               | $\text{OCOPhCF}_3$                      | 6.20 – 5.81                      | 156.2                                | 1069.5                  |
| <b>3b</b>  | OH               | $\text{OCOPhCF}_3$                      | 6.20 – 5.89                      | 171.9                                | 1033.9                  |
| <b>3a'</b> | $\text{OCOCH}_3$ | $\text{OCOPhCF}_3$                      | 6.59                             | 155.8                                | 1249.0                  |
| <b>3b'</b> | $\text{OCOCH}_3$ | $\text{OCOPhCF}_3$                      | 6.64                             | 171.8                                | 1213.0                  |

<sup>a</sup> $\text{R}_1$  and  $\text{R}_2$  are the axial ligands of Pt(IV) complexes based on cisplatin.

**Table S2.** The equation for pseudo first order reaction and half-life of cisplatin-based Pt(IV) complexes.

| Compound (100 $\mu$ M) | Reducing agent (2 mM) | Linear equation                           | $k^a$  | $T_{1/2}$ (min) <sup>b</sup> |
|------------------------|-----------------------|-------------------------------------------|--------|------------------------------|
| <b>1a</b>              | ascorbate             | $y = -0.0064x - 0.0324$<br>$R^2 = 0.9928$ | 0.0064 | 108                          |
| <b>1b</b>              | ascorbate             | $y = -0.0041x - 0.0293$<br>$R^2 = 0.99$   | 0.0041 | 169                          |
| <b>1a'</b>             | ascorbate             | $y = -0.0224x - 0.0682$<br>$R^2 = 0.997$  | 0.0224 | 31                           |
| <b>1b'</b>             | ascorbate             | $y = -0.0052x - 0.0181$<br>$R^2 = 0.9907$ | 0.0052 | 135                          |
| <b>2a</b>              | ascorbate             | $y = -0.0254x - 0.0206$<br>$R^2 = 0.998$  | 0.0254 | 27                           |
| <b>2b</b>              | ascorbate             | $y = -0.0072x + 0.0423$<br>$R^2 = 0.9819$ | 0.0072 | 96                           |
| <b>2a'</b>             | ascorbate             | $y = -0.0533x - 0.1246$<br>$R^2 = 0.9925$ | 0.0533 | 13                           |
| <b>2b'</b>             | ascorbate             | $y = -0.0065x + 0.0145$<br>$R^2 = 0.9834$ | 0.0065 | 107                          |
| <b>3a</b>              | ascorbate             | $y = -0.0685x - 0.174$<br>$R^2 = 0.959$   | 0.0685 | 10                           |
| <b>3b</b>              | ascorbate             | $y = -0.0095x - 0.0297$<br>$R^2 = 0.9915$ | 0.0095 | 73                           |
| <b>3a'</b>             | ascorbate             | $y = -0.1155x - 0.0145$<br>$R^2 = 0.9414$ | 0.1155 | 6                            |
| <b>3b'</b>             | ascorbate             | $y = -0.0136x - 0.0129$<br>$R^2 = 0.9991$ | 0.0136 | 51                           |

<sup>a</sup> $k$  (slope) is the rate constant determined by a linear plot of  $\ln(A_t/A_0)$  to incubation time  $t$  according to an equation of pseudo first-order rate:  $[A] = [A_0]e^{-kt}$ .  $A_0$  and  $A_t$  are the peak areas of Pt(IV) complexes normalized with the corresponding internal standard at 0 h, and  $t$  h. <sup>b</sup> The half-life of the pseudo first-order reaction  $T_{1/2} = \ln 2 / k$  (where ' $k$ ' denotes the rate constant). 100  $\mu$ M of Pt(IV) complexes were incubated in a PBS buffer (pH = 7.4) with 2 mM ascorbate at 37 °C.
